# Supplementary material for: Transcriptomic and functional analyses of 3D placental extravillous trophoblast spheroids
Source: PubMed Central journal article supplement (PMC6717201; doi:10.1038/s41598-019-48816-8), 2019-08-30

# Transcriptomic and functional analyses of 3D placental extravillous trophoblast spheroids

## Supplementary Tables S1-S2, S4-S5, S7-S8 Supplementary Figure S1

Michael K. Wong<sup>1</sup>, Mishquatul Wahed<sup>2</sup>, Sarah A. Shawky<sup>2</sup>, Anna Dvorkin-Gheva<sup>3</sup>, Sandeep Raha<sup>1,2\*</sup>

<sup>1</sup> Graduate Program in Medical Sciences, McMaster University, Hamilton, Ontario, Canada, L8N 3Z5.

<sup>2</sup> Department of Pediatrics, McMaster University, Hamilton, Ontario, Canada, L8N 3Z5.

<sup>3</sup> McMaster Immunology Research Centre, McMaster University, Hamilton, ON, Canada, L8N 3Z5.

\* Corresponding author email: [rahas@mcmaster.ca](mailto:rahas@mcmaster.ca)

**Supplementary Table S1. Most significantly up-regulated GSEA canonical pathways in EVT<sub>s</sub> cultured as 3D spheroids.**

| <b>Module</b> | <b>Category</b>                         | <b>Canonical Pathway Term</b>           | <b>NES</b> | <b>FDR p-value</b> |
|---------------|-----------------------------------------|-----------------------------------------|------------|--------------------|
| 23            | Neuroactive ligand-receptor interaction | Olfactory Signaling Pathway             | -3.0542696 | 0                  |
| 23            | Neuroactive ligand-receptor interaction | Olfactory Transduction                  | -2.966659  | 0                  |
| 6             | Neuroactive ligand-receptor interaction | Class A1 Rhodopsin Like Receptors       | -2.5756402 | 0                  |
| 16            | Immune processes, diseases, defensins   | Defensins                               | -2.4561152 | 0                  |
| 6             | Neuroactive ligand-receptor interaction | GPCR Ligand Binding                     | -2.439125  | 0                  |
| 16            | Immune processes, diseases, defensins   | Beta Defensins                          | -2.4266376 | 0                  |
| 6             | Neuroactive ligand-receptor interaction | Neuroactive Ligand Receptor Interaction | -2.3954382 | 0                  |
| 15            | Signaling events                        | Peptide Ligand Binding Receptors        | -2.3515468 | 0                  |
| 7             | Immune processes, diseases, defensins   | Chemokine Receptors Bind Chemokines     | -2.2149904 | 0                  |
| 6             | Neuroactive ligand-receptor interaction | Amine Ligand Binding Receptors          | -2.1915238 | 9.33E-05           |
| 7             | Immune processes, diseases, defensins   | Cytokine-Cytokine Receptor Interaction  | -2.1703234 | 8.48E-05           |
| 7             | Immune processes, diseases, defensins   | Cytosolic DNA Sensing Pathway           | -2.162791  | 7.77E-05           |
| 15            | Signaling events                        | G Alpha I Signaling Events              | -2.142522  | 7.17E-05           |
| 7             | Immune processes, diseases, defensins   | Secreted Factors                        | -2.0940683 | 2.38E-04           |
| 13            | ECM                                     | ECM Regulators                          | -2.0885324 | 2.22E-04           |

**Supplementary Table S2. Most significantly down-regulated GSEA canonical pathways in EVTs cultured as 3D spheroids**

| <b>Module</b> | <b>Category</b>                  | <b>Canonical Pathway Term</b>                                                                                                | <b>NES</b> | <b>FDR p-value</b> |
|---------------|----------------------------------|------------------------------------------------------------------------------------------------------------------------------|------------|--------------------|
| 5             | Diseases                         | Respiratory Electron Transport                                                                                               | 2.80283    | 0                  |
| 5             | Diseases                         | Respiratory Electron Transport<br>ATP Synthesis by<br>Chemiosmotic Coupling and<br>Heat Production by<br>Uncoupling Proteins | 2.735257   | 0                  |
| 5             | Diseases                         | TCA Cycle and Respiratory<br>Electron Transport                                                                              | 2.715474   | 0                  |
| 2             | Transcription, HIV<br>life cycle | RNA Pol II Transcription                                                                                                     | 2.701939   | 0                  |
| 2             | Transcription, HIV<br>life cycle | Late Phase of HIV Life Cycle                                                                                                 | 2.638732   | 0                  |
| 0             | Cell cycle, apoptosis            | DNA Replication                                                                                                              | 2.581079   | 0                  |
| 2             | Transcription, HIV<br>life cycle | mRNA Processing                                                                                                              | 2.567776   | 0                  |
| 2             | Transcription, HIV<br>life cycle | RNA Pol II Pre-Transcription<br>Events                                                                                       | 2.557952   | 0                  |
| 0             | Cell cycle, apoptosis            | Mitotic M-M/G1 Phases                                                                                                        | 2.541292   | 0                  |
| 3             | Cell cycle                       | DNA Repair                                                                                                                   | 2.527595   | 0                  |
| 0             | Cell cycle, apoptosis            | Activation of ATR In<br>Response to Replication Stress                                                                       | 2.509505   | 0                  |
| 2             | Transcription, HIV<br>life cycle | Transcription Coupled<br>Nucleotide Excision Repair                                                                          | 2.504607   | 0                  |
| 3             | Cell cycle                       | Nucleotide Excision Repair                                                                                                   | 2.501146   | 0                  |
| 3             | Cell cycle                       | Nucleotide Excision Repair                                                                                                   | 2.485817   | 0                  |
| 2             | Transcription, HIV<br>life cycle | mRNA Splicing                                                                                                                | 2.484428   | 0                  |

**Supplementary Table S3. Full list of GSEA canonical pathways in EVT<sub>s</sub> cultured as 2D monolayers and 3D spheroids.**

Please see attached excel document entitled "Supplementary Table S3 - GSEA Canonical Pathway 2D and 3D"

**Supplementary Table S4. Most significantly up-regulated GSEA biological processes in EVT<sub>s</sub> cultured as 3D spheroids**

| <b>Module</b> | <b>Category</b>       | <b>Biological Process Term</b>                                          | <b>NES</b> | <b>FDR p-value</b> |
|---------------|-----------------------|-------------------------------------------------------------------------|------------|--------------------|
| <b>34</b>     | Perception            | Sensory Perception of Chemical Stimulus                                 | -2.9727    | 0                  |
| <b>9</b>      | Chemotaxis            | Chemokine Mediated Signaling Pathway                                    | -2.23976   | 3.86E-04           |
| <b>16</b>     | Immune Processes      | Positive Regulation of Inflammatory Response                            | -2.23484   | 2.58E-04           |
| <b>n/a</b>    | n/a                   | Phospholipase C Activating G Protein Coupled Receptor Signaling Pathway | -2.23057   | 1.93E-04           |
| <b>39</b>     | Peptide cross linking | Peptide Cross Linking                                                   | -2.2077    | 1.55E-04           |
| <b>11</b>     | Immune Processes      | Positive Regulation of Leukocyte Chemotaxis                             | -2.20589   | 1.29E-04           |
| <b>11</b>     | Immune Processes      | Regulation of Leukocyte Chemotaxis                                      | -2.16591   | 4.43E-04           |
| <b>11</b>     | Immune Processes      | Positive Regulation of Leukocyte Migration                              | -2.16474   | 3.88E-04           |
| <b>5</b>      | Immune Processes      | Defense Response to Bacterium                                           | -2.15508   | 4.31E-04           |
| <b>17</b>     | Systemic process      | Regulation of Neurological System Process                               | -2.12934   | 9.29E-04           |
| <b>11</b>     | Immune Processes      | Regulation of Leukocyte Migration                                       | -2.12286   | 9.85E-04           |
| <b>36</b>     | Response to zinc      | Cellular Response to Zinc Ion                                           | -2.12121   | 9.03E-04           |
| <b>16</b>     | Immune Processes      | Regulation of Heat Generation                                           | -2.10755   | 0.001011           |
| <b>16</b>     | Immune Processes      | Positive Regulation of Acute Inflammatory Response                      | -2.09269   | 0.001104           |
| <b>28</b>     | Immune Processes      | Natural Killer Cell Activation Involved in Immune Response              | -2.09089   | 0.001185           |

**Supplementary Table S5. Most significantly down-regulated GSEA biological processes in EVT<sub>s</sub> cultured as 3D spheroids**

| <b>Module</b> | <b>Category</b>                            | <b>Biological Process Term</b>                          | <b>NES</b> | <b>FDR p-value</b> |
|---------------|--------------------------------------------|---------------------------------------------------------|------------|--------------------|
| 25            | Protein complexes                          | Mitochondrial Translation                               | 3.070361   | 0                  |
| 25            | Protein complexes                          | Translational Termination                               | 2.97231    | 0                  |
| 25            | Protein complexes                          | Translational Elongation                                | 2.886832   | 0                  |
| 2             | Metabolism,<br>biosynthesis,<br>catabolism | Electron Transport Chain                                | 2.729035   | 0                  |
| 1             | Cell cycle                                 | Nucleotide Excision Repair                              | 2.713833   | 0                  |
| 2             | Metabolism,<br>biosynthesis,<br>catabolism | Oxidative Phosphorylation                               | 2.685758   | 0                  |
| 1             | Cell cycle                                 | Transcription Coupled<br>Nucleotide Excision Repair     | 2.676514   | 0                  |
| 2             | Metabolism,<br>biosynthesis,<br>catabolism | Mitochondrial Respiratory<br>Chain Complex I Biogenesis | 2.666465   | 0                  |
| 2             | Metabolism,<br>biosynthesis,<br>catabolism | Mitochondrial Respiratory<br>Chain Complex Assembly     | 2.661326   | 0                  |
| 1             | Cell cycle                                 | DNA-Dependent DNA<br>Replication                        | 2.659598   | 0                  |
| 4             | Transcription                              | DNA-Templated Transcription<br>Termination              | 2.611477   | 0                  |
| 2             | Metabolism,<br>biosynthesis,<br>catabolism | Cellular Respiration                                    | 2.577143   | 0                  |
| 25            | Protein complexes                          | Cellular Protein Complex<br>Disassembly                 | 2.53722    | 0                  |
| 0             | Metabolism,<br>biosynthesis,<br>catabolism | tRNA Metabolic Process                                  | 2.504275   | 0                  |
| 4             | Transcription                              | RNA Splicing via<br>Transesterification Reactions       | 2.479853   | 1.21E-04           |

**Supplementary Table S6. Full list of GSEA biological processes in EVT<sub>s</sub> cultured as 2D monolayers and 3D spheroids.**

Please see attached excel document entitled "Supplementary Table S6 - GSEA Biological Processes 2D and 3D"

**Supplementary Table S7. Most significantly up-regulated GO biological processes in EVT<sub>s</sub> cultured as 3D spheroids.** GO-ID may be used to cross-reference category and term to find full gene list provided in Supplementary Table S7.

| <b>Category</b>                                            | <b>GO-ID</b> | <b>Biological Process Term</b>                          | <b>FDR p-value</b> |
|------------------------------------------------------------|--------------|---------------------------------------------------------|--------------------|
| Sensory perception                                         | 7608         | Sensory Perception of Smell                             | 2.97E-65           |
| Sensory perception                                         | 7606         | Sensory Perception of Chemical Stimulus                 | 1.36E-63           |
| Sensory perception                                         | 7600         | Sensory Perception                                      | 4.10E-48           |
| Transport                                                  | 50877        | Neurological System Process                             | 5.62E-47           |
| Sensory perception                                         | 50890        | Cognition                                               | 3.54E-46           |
| Transport                                                  | 3008         | System Process                                          | 9.63E-46           |
| Response to stimulus,<br>would healing                     | 50896        | Response to Stimulus                                    | 7.50E-40           |
| Transport                                                  | 32501        | Multicellular Organismal Process                        | 1.74E-34           |
| Response to stimulus,<br>would healing                     | 6952         | Defense Response                                        | 2.11E-13           |
| Response to stimulus,<br>would healing                     | 7626         | Locomotory Behavior                                     | 1.73E-10           |
| G-protein signaling                                        | 7186         | G-Protein Coupled Receptor Protein<br>Signaling Pathway | 8.83E-10           |
| Response to stimulus,<br>would healing                     | 42330        | Taxis                                                   | 3.71E-09           |
| Response to stimulus,<br>would healing                     | 6935         | Chemotaxis                                              | 3.71E-09           |
| Transport                                                  | 40011        | Locomotion                                              | 8.68E-09           |
| Immune processes,<br>angiogenesis, response<br>to stimulus | 32101        | Regulation of Response to External<br>Stimulus          | 4.36E-08           |



**Supplementary Table S8. Most significantly down-regulated GO biological processes in EVT<sub>s</sub> cultured as 3D spheroids.** GO-ID may be used to cross-reference category and term to find full gene list provided in Supplementary Table S7.

| <b>Category</b>                              | <b>GO-ID</b> | <b>Biological Process Term</b>                                        | <b>FDR p-value</b> |
|----------------------------------------------|--------------|-----------------------------------------------------------------------|--------------------|
| Metabolic, biosynthetic, catabolic processes | 44237        | Cellular Metabolic Process                                            | 8.46E-37           |
| Metabolic, biosynthetic, catabolic processes | 8152         | Metabolic Process                                                     | 1.16E-24           |
| Transcription, translation, DNA replication  | 44260        | Cellular Macromolecule Metabolic Process                              | 3.94E-23           |
| Metabolic, biosynthetic, catabolic processes | 44238        | Primary Metabolic Process                                             | 1.19E-19           |
| Metabolic, biosynthetic, catabolic processes | 34641        | Cellular Nitrogen Compound Metabolic Process                          | 1.50E-18           |
| Cell cycle                                   | 6996         | Organelle Organization                                                | 9.17E-18           |
| Metabolic, biosynthetic, catabolic processes | 6139         | Nucleobase, Nucleoside, Nucleotide and Nucleic Acid Metabolic Process | 2.32E-17           |
| Cell cycle                                   | 9987         | Cellular Process                                                      | 4.64E-16           |
| Metabolic, biosynthetic, catabolic processes | 6807         | Nitrogen Compound Metabolic Process                                   | 5.82E-16           |
| Transcription, translation, DNA replication  | 43170        | Macromolecule Metabolic Process                                       | 1.04E-15           |
| Cell cycle                                   | 16043        | Cellular Component Organization                                       | 9.53E-15           |
| Transcription, translation, DNA replication  | 90304        | Nucleic Acid Metabolic Process                                        | 1.05E-14           |
| Metabolic, biosynthetic, catabolic processes | 44249        | Cellular Biosynthetic Process                                         | 1.27E-14           |
| Transcription, translation, DNA replication  | 44267        | Cellular Protein Metabolic Process                                    | 4.32E-13           |
| Metabolic, biosynthetic, catabolic processes | 9058         | Biosynthetic Process                                                  | 5.54E-13           |

**Supplementary Table S9. Full list of GO biological processes in EVT<sub>s</sub> cultured as 2D monolayers and 3D spheroids.**

Please see attached excel document entitled "Supplementary Table S8 - GO Biological Processes 2D and 3D"

**Supplementary Figure S1.** Whole blots for Western blots of (a) MMP9 and (b) TIMP2 protein. A single gel was run and protein transferred onto a PVDF membrane. Membrane was then cut below 63kDa and the top half used for the MMP9 blot. Same membrane was cut just above 25 kDa was used for the TIMP2 blot. Remaining, unused portion of membrane was disposed.

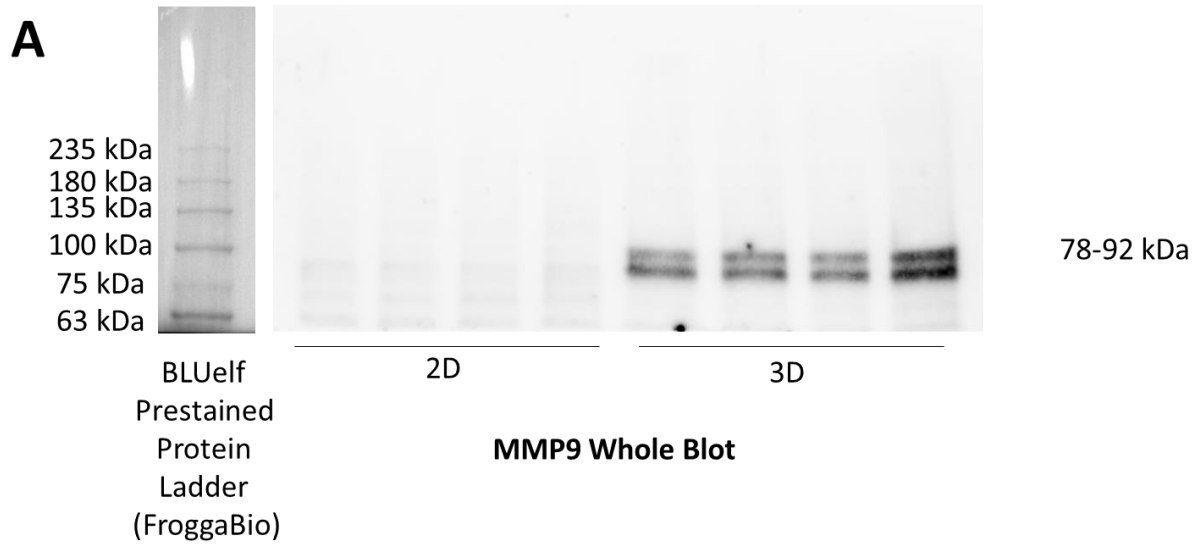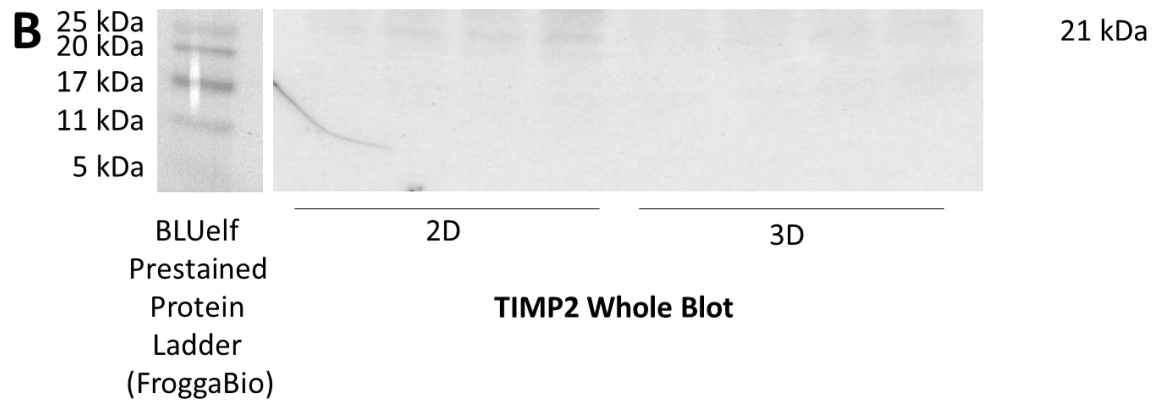

Supplement: 41598_2019_48816_MOESM1_ESM.pdf [file 41598_2019_48816_MOESM1_ESM.pdf]
