# Supplementary material for: Transcriptomic and functional analyses of 3D placental extravillous trophoblast spheroids
Source: Sci Rep. 2019 Aug 30;9:12607. doi: 10.1038/s41598-019-48816-8 (PMC6717201; doi:10.1038/s41598-019-48816-8)
Supplement: Supplementary file 2 — Supplementary Table S3 [file 41598_2019_48816_MOESM2_ESM.xlsx]

## Sheet: Up-Regulated Pathway Terms
Canonical Pathway Term	NES	FDR p-value
REACTOME_OLFACTORY_SIGNALING_PATHWAY	-3.05427	0
KEGG_OLFACTORY_TRANSDUCTION	-2.96666	0
REACTOME_CLASS_A1_RHODOPSIN_LIKE_RECEPTORS	-2.57564	0
REACTOME_DEFENSINS	-2.45612	0
REACTOME_GPCR_LIGAND_BINDING	-2.43913	0
REACTOME_BETA_DEFENSINS	-2.42664	0
KEGG_NEUROACTIVE_LIGAND_RECEPTOR_INTERACTION	-2.39544	0
REACTOME_PEPTIDE_LIGAND_BINDING_RECEPTORS	-2.35155	0
REACTOME_CHEMOKINE_RECEPTORS_BIND_CHEMOKINES	-2.21499	0
REACTOME_AMINE_LIGAND_BINDING_RECEPTORS	-2.19152	9.32656e-05
KEGG_CYTOKINE_CYTOKINE_RECEPTOR_INTERACTION	-2.17032	8.47869e-05
KEGG_CYTOSOLIC_DNA_SENSING_PATHWAY	-2.16279	7.77213e-05
REACTOME_G_ALPHA_I_SIGNALLING_EVENTS	-2.14252	7.17428e-05
NABA_SECRETED_FACTORS	-2.09407	0.000237728
NABA_ECM_REGULATORS	-2.08853	0.000221879
REACTOME_DEGRADATION_OF_THE_EXTRACELLULAR_MATRIX	-2.07243	0.000326869
REACTOME_PHASE1_FUNCTIONALIZATION_OF_COMPOUNDS	-2.07102	0.000307642
REACTOME_CYTOCHROME_P450_ARRANGED_BY_SUBSTRATE_TYPE	-2.04444	0.00036913
REACTOME_POTASSIUM_CHANNELS	-2.03782	0.000399115
KEGG_HEMATOPOIETIC_CELL_LINEAGE	-2.0315	0.00042582
KEGG_LINOLEIC_ACID_METABOLISM	-2.01001	0.000607533
REACTOME_VOLTAGE_GATED_POTASSIUM_CHANNELS	-1.94891	0.00227693
REACTOME_EXTRACELLULAR_MATRIX_ORGANIZATION	-1.94021	0.00263121
NABA_PROTEOGLYCANS	-1.89405	0.00500822
REACTOME_G_ALPHA_S_SIGNALLING_EVENTS	-1.87316	0.00641461
REACTOME_NUCLEOTIDE_LIKE_PURINERGIC_RECEPTORS	-1.86165	0.00738943
KEGG_RETINOL_METABOLISM	-1.83336	0.0111332
NABA_ECM_AFFILIATED	-1.81758	0.0133639
NABA_CORE_MATRISOME	-1.78496	0.0199652
REACTOME_REGULATION_OF_IFNA_SIGNALING	-1.78203	0.0201028
REACTOME_G_ALPHA_Q_SIGNALLING_EVENTS	-1.77411	0.0215114
KEGG_AUTOIMMUNE_THYROID_DISEASE	-1.76554	0.0230244
PID_INTEGRIN2_PATHWAY	-1.75465	0.0256253
REACTOME_METABOLISM_OF_STEROID_HORMONES_AND_VITAMINS_A_AND_D	-1.733	0.0318622
REACTOME_INFLAMMASOMES	-1.72782	0.0329625
KEGG_COMPLEMENT_AND_COAGULATION_CASCADES	-1.72266	0.0339855
PID_IL23_PATHWAY	-1.71642	0.0355203
KEGG_ALPHA_LINOLENIC_ACID_METABOLISM	-1.7113	0.0368242
REACTOME_AMINE_COMPOUND_SLC_TRANSPORTERS	-1.70657	0.0381766
KEGG_ASTHMA	-1.68886	0.0448275
REACTOME_TRANSPORT_OF_GLUCOSE_AND_OTHER_SUGARS_BILE_SALTS_AND_ORGANIC_ACIDS_METAL_IONS_AND_AMINE_COMPOUNDS	-1.68057	0.0481143
KEGG_INTESTINAL_IMMUNE_NETWORK_FOR_IGA_PRODUCTION	-1.67938	0.0473858
BIOCARTA_CYTOKINE_PATHWAY	-1.67519	0.0484018
KEGG_ARACHIDONIC_ACID_METABOLISM	-1.67434	0.0477203
REACTOME_PHOSPHORYLATION_OF_CD3_AND_TCR_ZETA_CHAINS	-1.6733	0.0471344
KEGG_ETHER_LIPID_METABOLISM	-1.66881	0.0481553
REACTOME_NA_CL_DEPENDENT_NEUROTRANSMITTER_TRANSPORTERS	-1.65799	0.052538
REACTOME_XENOBIOTICS	-1.64019	0.0615167
REACTOME_GAP_JUNCTION_ASSEMBLY	-1.63253	0.0651015
PID_INTEGRIN_A9B1_PATHWAY	-1.62677	0.0672308
REACTOME_GENERATION_OF_SECOND_MESSENGER_MOLECULES	-1.61955	0.0708919
REACTOME_GASTRIN_CREB_SIGNALLING_PATHWAY_VIA_PKC_AND_MAPK	-1.61694	0.0715546
BIOCARTA_ERYTH_PATHWAY	-1.61537	0.0712032
REACTOME_ENDOGENOUS_STEROLS	-1.61532	0.0699196
REACTOME_ACYL_CHAIN_REMODELLING_OF_PC	-1.61522	0.0687168
BIOCARTA_CTLA4_PATHWAY	-1.61468	0.0678536
NABA_COLLAGENS	-1.61254	0.0677812
REACTOME_PD1_SIGNALING	-1.60747	0.0699463
NABA_ECM_GLYCOPROTEINS	-1.60605	0.0698009
REACTOME_TRAF6_MEDIATED_IRF7_ACTIVATION	-1.60517	0.0692929
KEGG_TASTE_TRANSDUCTION	-1.59982	0.0716886
SA_MMP_CYTOKINE_CONNECTION	-1.59953	0.0707385
BIOCARTA_NKT_PATHWAY	-1.5936	0.0736486
REACTOME_ACYL_CHAIN_REMODELLING_OF_PG	-1.59353	0.0725565
KEGG_PRIMARY_BILE_ACID_BIOSYNTHESIS	-1.5924	0.0720643
REACTOME_BIOLOGICAL_OXIDATIONS	-1.58757	0.0741223
BIOCARTA_DC_PATHWAY	-1.58587	0.0740737
KEGG_LEISHMANIA_INFECTION	-1.57752	0.0788762
KEGG_TOLL_LIKE_RECEPTOR_SIGNALING_PATHWAY	-1.56901	0.0840707
KEGG_REGULATION_OF_AUTOPHAGY	-1.55966	0.0902681
REACTOME_INNATE_IMMUNE_SYSTEM	-1.55832	0.0900008
BIOCARTA_COMP_PATHWAY	-1.54885	0.0967932
REACTOME_BILE_ACID_AND_BILE_SALT_METABOLISM	-1.54819	0.0960236
PID_INTEGRIN_CS_PATHWAY	-1.54005	0.101494
PID_SYNDECAN_1_PATHWAY	-1.53928	0.100845
REACTOME_STEROID_HORMONES	-1.52756	0.109971
BIOCARTA_NO2IL12_PATHWAY	-1.5234	0.112441
REACTOME_COLLAGEN_FORMATION	-1.51847	0.116183
KEGG_CALCIUM_SIGNALING_PATHWAY	-1.51463	0.118515
PID_IL12_2PATHWAY	-1.50628	0.125068
PID_CD8_TCR_DOWNSTREAM_PATHWAY	-1.49854	0.131436
KEGG_HYPERTROPHIC_CARDIOMYOPATHY_HCM	-1.49551	0.133381
KEGG_JAK_STAT_SIGNALING_PATHWAY	-1.4932	0.134217
REACTOME_INWARDLY_RECTIFYING_K_CHANNELS	-1.48688	0.139595
BIOCARTA_TH1TH2_PATHWAY	-1.48061	0.145482
BIOCARTA_LAIR_PATHWAY	-1.46778	0.158829
REACTOME_REGULATION_OF_INSULIN_LIKE_GROWTH_FACTOR_IGF_ACTIVITY_BY_INSULIN_LIKE_GROWTH_FACTOR_BINDING_PROTEINS_IGFBPS	-1.46488	0.160658
KEGG_ECM_RECEPTOR_INTERACTION	-1.46442	0.159401
REACTOME_LIGAND_GATED_ION_CHANNEL_TRANSPORT	-1.45909	0.16427
REACTOME_IMMUNOREGULATORY_INTERACTIONS_BETWEEN_A_LYMPHOID_AND_A_NON_LYMPHOID_CELL	-1.44181	0.185154
REACTOME_PRE_NOTCH_PROCESSING_IN_GOLGI	-1.43882	0.187272
REACTOME_SYNTHESIS_SECRETION_AND_DEACYLATION_OF_GHRELIN	-1.42052	0.211721
REACTOME_CHYLOMICRON_MEDIATED_LIPID_TRANSPORT	-1.42038	0.209592
REACTOME_ACYL_CHAIN_REMODELLING_OF_PI	-1.40846	0.225943
REACTOME_SLC_MEDIATED_TRANSMEMBRANE_TRANSPORT	-1.40461	0.229765
REACTOME_TRANSPORT_OF_INORGANIC_CATIONS_ANIONS_AND_AMINO_ACIDS_OLIGOPEPTIDES	-1.40228	0.231058
REACTOME_INHIBITION_OF_VOLTAGE_GATED_CA2_CHANNELS_VIA_GBETA_GAMMA_SUBUNITS	-1.40168	0.229717
KEGG_DRUG_METABOLISM_CYTOCHROME_P450	-1.40048	0.22934
BIOCARTA_INTRINSIC_PATHWAY	-1.39913	0.229262
REACTOME_ACYL_CHAIN_REMODELLING_OF_PE	-1.39913	0.226974
REACTOME_GLUCAGON_TYPE_LIGAND_RECEPTORS	-1.39847	0.225581
KEGG_GRAFT_VERSUS_HOST_DISEASE	-1.39778	0.224342
PID_IL27_PATHWAY	-1.39547	0.225964
REACTOME_PLATELET_CALCIUM_HOMEOSTASIS	-1.39147	0.230221
REACTOME_FORMATION_OF_FIBRIN_CLOT_CLOTTING_CASCADE	-1.39143	0.228096
REACTOME_CLASS_B_2_SECRETIN_FAMILY_RECEPTORS	-1.38703	0.23293
REACTOME_COMPLEMENT_CASCADE	-1.38519	0.233666
REACTOME_HS_GAG_BIOSYNTHESIS	-1.38505	0.231704
KEGG_NOD_LIKE_RECEPTOR_SIGNALING_PATHWAY	-1.38371	0.23167
REACTOME_NEURONAL_SYSTEM	-1.3735	0.24604
REACTOME_ION_CHANNEL_TRANSPORT	-1.37326	0.244241
REACTOME_GABA_RECEPTOR_ACTIVATION	-1.37108	0.245477
BIOCARTA_INFLAM_PATHWAY	-1.36908	0.246598
KEGG_STEROID_HORMONE_BIOSYNTHESIS	-1.36481	0.251313
KEGG_DILATED_CARDIOMYOPATHY	-1.36325	0.251701
KEGG_ANTIGEN_PROCESSING_AND_PRESENTATION	-1.35746	0.259479
REACTOME_ABCA_TRANSPORTERS_IN_LIPID_HOMEOSTASIS	-1.35579	0.260117
KEGG_RENIN_ANGIOTENSIN_SYSTEM	-1.34473	0.277521
REACTOME_SYNTHESIS_OF_BILE_ACIDS_AND_BILE_SALTS	-1.34357	0.277301
REACTOME_INTERFERON_GAMMA_SIGNALING	-1.34263	0.27656
REACTOME_ACTIVATED_NOTCH1_TRANSMITS_SIGNAL_TO_THE_NUCLEUS	-1.34236	0.274829
PID_FRA_PATHWAY	-1.34231	0.272643
PID_GLYPICAN_1PATHWAY	-1.34181	0.271234
REACTOME_PLATELET_AGGREGATION_PLUG_FORMATION	-1.33142	0.287797
REACTOME_AMINE_DERIVED_HORMONES	-1.32896	0.290038
REACTOME_TRANSMEMBRANE_TRANSPORT_OF_SMALL_MOLECULES	-1.32877	0.288115
BIOCARTA_IL12_PATHWAY	-1.32813	0.287074
REACTOME_TERMINATION_OF_O_GLYCAN_BIOSYNTHESIS	-1.32516	0.290174
REACTOME_LIPID_DIGESTION_MOBILIZATION_AND_TRANSPORT	-1.31591	0.30528
REACTOME_CGMP_EFFECTS	-1.31469	0.305183
REACTOME_SIGNALING_BY_NOTCH1	-1.30796	0.315776
REACTOME_INTEGRIN_CELL_SURFACE_INTERACTIONS	-1.29922	0.330487
BIOCARTA_TOB1_PATHWAY	-1.29202	0.342544
REACTOME_RESPONSE_TO_ELEVATED_PLATELET_CYTOSOLIC_CA2_	-1.29133	0.341443
REACTOME_AMINO_ACID_AND_OLIGOPEPTIDE_SLC_TRANSPORTERS	-1.28761	0.346626
REACTOME_NITRIC_OXIDE_STIMULATES_GUANYLATE_CYCLASE	-1.28652	0.346184
REACTOME_SIGNALING_BY_NOTCH	-1.27746	0.362655
KEGG_GLYCOSAMINOGLYCAN_BIOSYNTHESIS_HEPARAN_SULFATE	-1.27425	0.366974
BIOCARTA_GSK3_PATHWAY	-1.27312	0.366735
REACTOME_LIPOPROTEIN_METABOLISM	-1.26779	0.375638
KEGG_GLYCOSPHINGOLIPID_BIOSYNTHESIS_LACTO_AND_NEOLACTO_SERIES	-1.26621	0.37632
KEGG_CELL_ADHESION_MOLECULES_CAMS	-1.26536	0.375584
ST_WNT_CA2_CYCLIC_GMP_PATHWAY	-1.26419	0.375537
PID_CD8_TCR_PATHWAY	-1.26027	0.381376
PID_TCR_PATHWAY	-1.25942	0.380556
PID_AMB2_NEUTROPHILS_PATHWAY	-1.25829	0.380433
REACTOME_TCR_SIGNALING	-1.24917	0.398109
REACTOME_PLATELET_HOMEOSTASIS	-1.23496	0.427853
KEGG_CHEMOKINE_SIGNALING_PATHWAY	-1.22941	0.438316
PID_UPA_UPAR_PATHWAY	-1.22794	0.438879
REACTOME_ACTIVATED_POINT_MUTANTS_OF_FGFR2	-1.22689	0.43852
REACTOME_NUCLEOTIDE_BINDING_DOMAIN_LEUCINE_RICH_REPEAT_CONTAINING_RECEPTOR_NLR_SIGNALING_PATHWAYS	-1.22568	0.438394
REACTOME_P130CAS_LINKAGE_TO_MAPK_SIGNALING_FOR_INTEGRINS	-1.2227	0.442772
BIOCARTA_IL1R_PATHWAY	-1.22135	0.443005
PID_HIF1_TFPATHWAY	-1.22017	0.443039
KEGG_PANTOTHENATE_AND_COA_BIOSYNTHESIS	-1.21285	0.457138
REACTOME_SYNTHESIS_OF_PA	-1.20627	0.470318
KEGG_ARRHYTHMOGENIC_RIGHT_VENTRICULAR_CARDIOMYOPATHY_ARVC	-1.20531	0.46969
BIOCARTA_AMI_PATHWAY	-1.20498	0.467457
PID_IL2_STAT5_PATHWAY	-1.19932	0.478284
REACTOME_O_LINKED_GLYCOSYLATION_OF_MUCINS	-1.19928	0.47544
PID_INTEGRIN1_PATHWAY	-1.19292	0.487906
KEGG_RIG_I_LIKE_RECEPTOR_SIGNALING_PATHWAY	-1.19159	0.4881
PID_NFAT_TFPATHWAY	-1.18794	0.493921
REACTOME_ACYL_CHAIN_REMODELLING_OF_PS	-1.1839	0.500846
REACTOME_ACETYLCHOLINE_BINDING_AND_DOWNSTREAM_EVENTS	-1.18356	0.498635
KEGG_TYROSINE_METABOLISM	-1.18333	0.496243
REACTOME_DOWNSTREAM_TCR_SIGNALING	-1.17963	0.502537
PID_DELTA_NP63_PATHWAY	-1.17883	0.501498
PID_INTEGRIN3_PATHWAY	-1.17496	0.508018
REACTOME_GABA_B_RECEPTOR_ACTIVATION	-1.1725	0.511233
REACTOME_NCAM1_INTERACTIONS	-1.16593	0.524808
REACTOME_TIE2_SIGNALING	-1.16516	0.523841
KEGG_NATURAL_KILLER_CELL_MEDIATED_CYTOTOXICITY	-1.15925	0.535903
REACTOME_NEUROTRANSMITTER_RELEASE_CYCLE	-1.1507	0.554837
REACTOME_ION_TRANSPORT_BY_P_TYPE_ATPASES	-1.14752	0.560312
KEGG_SYSTEMIC_LUPUS_ERYTHEMATOSUS	-1.14744	0.557352
KEGG_LONG_TERM_DEPRESSION	-1.14717	0.55482
KEGG_PRION_DISEASES	-1.1414	0.567034
REACTOME_NUCLEAR_SIGNALING_BY_ERBB4	-1.14083	0.565284
REACTOME_HEPARAN_SULFATE_HEPARIN_HS_GAG_METABOLISM	-1.13974	0.564849
PID_ANTHRAX_PATHWAY	-1.12772	0.593668
REACTOME_TRANSMISSION_ACROSS_CHEMICAL_SYNAPSES	-1.12716	0.591842
KEGG_METABOLISM_OF_XENOBIOTICS_BY_CYTOCHROME_P450	-1.12563	0.592568
KEGG_PHENYLALANINE_METABOLISM	-1.12539	0.590035
KEGG_GLYCOSAMINOGLYCAN_DEGRADATION	-1.11794	0.606322
REACTOME_HEMOSTASIS	-1.11321	0.615459
KEGG_GLYCEROPHOSPHOLIPID_METABOLISM	-1.10714	0.628812
REACTOME_CYTOKINE_SIGNALING_IN_IMMUNE_SYSTEM	-1.1057	0.629426
REACTOME_ABC_FAMILY_PROTEINS_MEDIATED_TRANSPORT	-1.10353	0.631961
REACTOME_CELL_SURFACE_INTERACTIONS_AT_THE_VASCULAR_WALL	-1.09977	0.638855
REACTOME_INTRINSIC_PATHWAY	-1.0958	0.646327
REACTOME_INTERFERON_ALPHA_BETA_SIGNALING	-1.09418	0.64754
PID_ER_NONGENOMIC_PATHWAY	-1.09113	0.652275
REACTOME_INTEGRIN_ALPHAIIB_BETA3_SIGNALING	-1.08219	0.673589
BIOCARTA_MTA3_PATHWAY	-1.08031	0.675298
REACTOME_TIGHT_JUNCTION_INTERACTIONS	-1.07877	0.675941
PID_SHP2_PATHWAY	-1.06881	0.699894
REACTOME_INTERFERON_SIGNALING	-1.06516	0.706749
PID_WNT_SIGNALING_PATHWAY	-1.06409	0.706149
REACTOME_ADP_SIGNALLING_THROUGH_P2RY1	-1.06214	0.707898
PID_TCR_CALCIUM_PATHWAY	-1.05857	0.714363
REACTOME_IL_RECEPTOR_SHC_SIGNALING	-1.05568	0.718763
REACTOME_GABA_SYNTHESIS_RELEASE_REUPTAKE_AND_DEGRADATION	-1.05447	0.718533
PID_LYMPH_ANGIOGENESIS_PATHWAY	-1.05254	0.720145
REACTOME_REGULATION_OF_BETA_CELL_DEVELOPMENT	-1.047	0.731843
REACTOME_GLYCOSAMINOGLYCAN_METABOLISM	-1.04473	0.734536
REACTOME_NOTCH1_INTRACELLULAR_DOMAIN_REGULATES_TRANSCRIPTION	-1.04346	0.734425
KEGG_DRUG_METABOLISM_OTHER_ENZYMES	-1.04269	0.732884
KEGG_ALLOGRAFT_REJECTION	-1.04016	0.736326
KEGG_TYPE_I_DIABETES_MELLITUS	-1.03523	0.746213
REACTOME_INTERACTION_BETWEEN_L1_AND_ANKYRINS	-1.02809	0.762213
PID_HNF3A_PATHWAY	-1.02716	0.761228
KEGG_ABC_TRANSPORTERS	-1.02509	0.763541
PID_AP1_PATHWAY	-1.02492	0.760441
REACTOME_A_TETRASACCHARIDE_LINKER_SEQUENCE_IS_REQUIRED_FOR_GAG_SYNTHESIS	-1.02481	0.757215
REACTOME_ZINC_TRANSPORTERS	-1.02291	0.758937
REACTOME_GAP_JUNCTION_TRAFFICKING	-1.01708	0.771027
KEGG_GLYCOSPHINGOLIPID_BIOSYNTHESIS_GANGLIO_SERIES	-1.0101	0.786658
PID_TNF_PATHWAY	-1.00894	0.786352
KEGG_PRIMARY_IMMUNODEFICIENCY	-0.998119	0.812351
KEGG_VASCULAR_SMOOTH_MUSCLE_CONTRACTION	-0.990167	0.830055
REACTOME_CELL_CELL_JUNCTION_ORGANIZATION	-0.987983	0.83227
ST_T_CELL_SIGNAL_TRANSDUCTION	-0.987798	0.829074
REACTOME_SIGNAL_AMPLIFICATION	-0.987653	0.825778
PID_INTEGRIN5_PATHWAY	-0.984242	0.831154
BIOCARTA_CK1_PATHWAY	-0.983963	0.82825
REACTOME_RIG_I_MDA5_MEDIATED_INDUCTION_OF_IFN_ALPHA_BETA_PATHWAYS	-0.982793	0.827812
KEGG_BASAL_CELL_CARCINOMA	-0.980022	0.831484
KEGG_LEUKOCYTE_TRANSENDOTHELIAL_MIGRATION	-0.978926	0.830709
BIOCARTA_NO1_PATHWAY	-0.977264	0.831437
KEGG_CARDIAC_MUSCLE_CONTRACTION	-0.97696	0.828748
ST_MYOCYTE_AD_PATHWAY	-0.972068	0.838383
REACTOME_NEUROTRANSMITTER_RECEPTOR_BINDING_AND_DOWNSTREAM_TRANSMISSION_IN_THE_POSTSYNAPTIC_CELL	-0.96873	0.84351
REACTOME_THROMBOXANE_SIGNALLING_THROUGH_TP_RECEPTOR	-0.96814	0.841533
REACTOME_PLATELET_ACTIVATION_SIGNALING_AND_AGGREGATION	-0.962404	0.852742
REACTOME_COSTIMULATION_BY_THE_CD28_FAMILY	-0.96075	0.853538
REACTOME_PROSTACYCLIN_SIGNALLING_THROUGH_PROSTACYCLIN_RECEPTOR	-0.958621	0.855313
REACTOME_REGULATION_OF_INSULIN_SECRETION_BY_GLUCAGON_LIKE_PEPTIDE1	-0.951006	0.87177
BIOCARTA_NFKB_PATHWAY	-0.949637	0.871579
REACTOME_TRAFFICKING_OF_AMPA_RECEPTORS	-0.948331	0.871368
REACTOME_SYNTHESIS_OF_BILE_ACIDS_AND_BILE_SALTS_VIA_7ALPHA_HYDROXYCHOLESTEROL	-0.946798	0.871673
NABA_BASEMENT_MEMBRANES	-0.946586	0.868584
PID_CMYB_PATHWAY	-0.946092	0.866322
KEGG_RIBOFLAVIN_METABOLISM	-0.937669	0.884361
PID_P53_DOWNSTREAM_PATHWAY	-0.934484	0.889033
REACTOME_GRB2_SOS_PROVIDES_LINKAGE_TO_MAPK_SIGNALING_FOR_INTERGRINS_	-0.931556	0.892946
REACTOME_AQUAPORIN_MEDIATED_TRANSPORT	-0.929434	0.894662
PID_HES_HEY_PATHWAY	-0.928748	0.892787
KEGG_BLADDER_CANCER	-0.926561	0.894771
KEGG_NICOTINATE_AND_NICOTINAMIDE_METABOLISM	-0.924974	0.895133
REACTOME_SIGNALING_BY_ILS	-0.920174	0.903272
REACTOME_SHC_MEDIATED_CASCADE	-0.918865	0.90298
PID_AVB3_OPN_PATHWAY	-0.918119	0.901289
REACTOME_IL_2_SIGNALING	-0.91703	0.900349
PID_RAS_PATHWAY	-0.916985	0.896936
REACTOME_AMINO_ACID_TRANSPORT_ACROSS_THE_PLASMA_MEMBRANE	-0.91297	0.903034
PID_ERA_GENOMIC_PATHWAY	-0.912815	0.899942
PID_SYNDECAN_4_PATHWAY	-0.907679	0.908995
KEGG_MATURITY_ONSET_DIABETES_OF_THE_YOUNG	-0.89968	0.924571
BIOCARTA_STATHMIN_PATHWAY	-0.896505	0.928469
BIOCARTA_PML_PATHWAY	-0.89647	0.925015
PID_AVB3_INTEGRIN_PATHWAY	-0.895436	0.923898
REACTOME_DOWNREGULATION_OF_TGF_BETA_RECEPTOR_SIGNALING	-0.89258	0.927036
REACTOME_ADP_SIGNALLING_THROUGH_P2RY12	-0.885836	0.938986
PID_PTP1B_PATHWAY	-0.885441	0.936396
REACTOME_STRIATED_MUSCLE_CONTRACTION	-0.885023	0.93377
REACTOME_RAS_ACTIVATION_UOPN_CA2_INFUX_THROUGH_NMDA_RECEPTOR	-0.879478	0.942847
KEGG_ALDOSTERONE_REGULATED_SODIUM_REABSORPTION	-0.873975	0.951811
PID_TOLL_ENDOGENOUS_PATHWAY	-0.870204	0.956769
BIOCARTA_CCR5_PATHWAY	-0.869528	0.954785
KEGG_PPAR_SIGNALING_PATHWAY	-0.868381	0.953837
PID_VEGFR1_PATHWAY	-0.867004	0.953411
PID_IL12_STAT4_PATHWAY	-0.86509	0.954187
REACTOME_IL_3_5_AND_GM_CSF_SIGNALING	-0.864491	0.95194
REACTOME_TGF_BETA_RECEPTOR_SIGNALING_ACTIVATES_SMADS	-0.86339	0.950927
REACTOME_GLYCEROPHOSPHOLIPID_BIOSYNTHESIS	-0.852887	0.970016
REACTOME_BMAL1_CLOCK_NPAS2_ACTIVATES_CIRCADIAN_EXPRESSION	-0.846918	0.979113
REACTOME_GROWTH_HORMONE_RECEPTOR_SIGNALING	-0.839023	0.992237
KEGG_GLYCEROLIPID_METABOLISM	-0.837888	0.991055
KEGG_O_GLYCAN_BIOSYNTHESIS	-0.836083	0.991422
REACTOME_SYNTHESIS_OF_PC	-0.834865	0.990368
BIOCARTA_IL3_PATHWAY	-0.834149	0.988399
REACTOME_BASIGIN_INTERACTIONS	-0.832975	0.987341
KEGG_FC_EPSILON_RI_SIGNALING_PATHWAY	-0.82591	0.997987
BIOCARTA_CSK_PATHWAY	-0.824653	0.996938
BIOCARTA_IL2_PATHWAY	-0.823265	0.996198
KEGG_STARCH_AND_SUCROSE_METABOLISM	-0.821551	0.996152
KEGG_NOTCH_SIGNALING_PATHWAY	-0.819711	0.996252
PID_THROMBIN_PAR4_PATHWAY	-0.813281	1
REACTOME_AMYLOIDS	-0.81301	1
KEGG_VIRAL_MYOCARDITIS	-0.812788	0.999386
REACTOME_UNBLOCKING_OF_NMDA_RECEPTOR_GLUTAMATE_BINDING_AND_ACTIVATION	-0.812519	0.99645
BIOCARTA_CASPASE_PATHWAY	-0.810349	0.997072
REACTOME_METAL_ION_SLC_TRANSPORTERS	-0.809427	0.995384
PID_CONE_PATHWAY	-0.806954	0.996635
REACTOME_CHONDROITIN_SULFATE_DERMATAN_SULFATE_METABOLISM	-0.804316	0.998232
REACTOME_GLUCAGON_SIGNALING_IN_METABOLIC_REGULATION	-0.803517	0.996465
PID_ERBB_NETWORK_PATHWAY	-0.802874	0.994316
REACTOME_THE_ROLE_OF_NEF_IN_HIV1_REPLICATION_AND_DISEASE_PATHOGENESIS	-0.802684	0.99133
REACTOME_G_BETA_GAMMA_SIGNALLING_THROUGH_PLC_BETA	-0.798598	0.995275
REACTOME_FGFR_LIGAND_BINDING_AND_ACTIVATION	-0.795285	0.997841
PID_HNF3B_PATHWAY	-0.795139	0.994775
REACTOME_REGULATION_OF_INSULIN_SECRETION	-0.795026	0.991685
REACTOME_NOD1_2_SIGNALING_PATHWAY	-0.7948	0.98884
PID_SYNDECAN_2_PATHWAY	-0.793231	0.988292
KEGG_AMYOTROPHIC_LATERAL_SCLEROSIS_ALS	-0.792957	0.985557
PID_IL4_2PATHWAY	-0.79269	0.982821
ST_INTERLEUKIN_4_PATHWAY	-0.776927	1
REACTOME_CREB_PHOSPHORYLATION_THROUGH_THE_ACTIVATION_OF_CAMKII	-0.775825	1
REACTOME_NEF_MEDIATES_DOWN_MODULATION_OF_CELL_SURFACE_RECEPTORS_BY_RECRUITING_THEM_TO_CLATHRIN_ADAPTERS	-0.774077	1
REACTOME_PRE_NOTCH_EXPRESSION_AND_PROCESSING	-0.7586	1
REACTOME_SIGNALING_BY_ROBO_RECEPTOR	-0.757254	1
BIOCARTA_NTHI_PATHWAY	-0.753967	1
PID_HIF2PATHWAY	-0.751416	1
BIOCARTA_NKCELLS_PATHWAY	-0.750118	1
PID_NOTCH_PATHWAY	-0.74144	1
BIOCARTA_CARDIACEGF_PATHWAY	-0.741261	1
BIOCARTA_LONGEVITY_PATHWAY	-0.736619	1
PID_ERBB4_PATHWAY	-0.734736	1
REACTOME_REGULATION_OF_WATER_BALANCE_BY_RENAL_AQUAPORINS	-0.733462	1
PID_HDAC_CLASSII_PATHWAY	-0.731805	1
BIOCARTA_HSP27_PATHWAY	-0.728588	1
PID_PI3KCI_PATHWAY	-0.727879	1
PID_IL1_PATHWAY	-0.726741	1
PID_FGF_PATHWAY	-0.721743	1
REACTOME_NCAM_SIGNALING_FOR_NEURITE_OUT_GROWTH	-0.717956	1
REACTOME_SHC1_EVENTS_IN_ERBB4_SIGNALING	-0.717181	1
KEGG_FOCAL_ADHESION	-0.717179	1
PID_IL2_PI3K_PATHWAY	-0.716888	1
REACTOME_MUSCLE_CONTRACTION	-0.711041	1
REACTOME_ADHERENS_JUNCTIONS_INTERACTIONS	-0.70982	1
BIOCARTA_IL7_PATHWAY	-0.707605	1
WNT_SIGNALING	-0.706436	1
PID_LPA4_PATHWAY	-0.702816	1
REACTOME_INHIBITION_OF_INSULIN_SECRETION_BY_ADRENALINE_NORADRENALINE	-0.698707	1
KEGG_AXON_GUIDANCE	-0.697818	1
REACTOME_FORMATION_OF_TUBULIN_FOLDING_INTERMEDIATES_BY_CCT_TRIC	-0.687079	1
BIOCARTA_TEL_PATHWAY	-0.686969	1
REACTOME_KERATAN_SULFATE_BIOSYNTHESIS	-0.685503	1
REACTOME_FACTORS_INVOLVED_IN_MEGAKARYOCYTE_DEVELOPMENT_AND_PLATELET_PRODUCTION	-0.681643	1
KEGG_TGF_BETA_SIGNALING_PATHWAY	-0.679833	1
REACTOME_TRANSPORT_OF_VITAMINS_NUCLEOSIDES_AND_RELATED_MOLECULES	-0.675066	1
PID_NCADHERIN_PATHWAY	-0.672794	1
ST_TUMOR_NECROSIS_FACTOR_PATHWAY	-0.672327	1
REACTOME_CHONDROITIN_SULFATE_BIOSYNTHESIS	-0.670949	1
KEGG_SPHINGOLIPID_METABOLISM	-0.664845	1
KEGG_HEDGEHOG_SIGNALING_PATHWAY	-0.66427	1
PID_HEDGEHOG_2PATHWAY	-0.663373	1
PID_ECADHERIN_STABILIZATION_PATHWAY	-0.663344	1
REACTOME_SIGNALING_BY_BMP	-0.661191	1
PID_ARF6_TRAFFICKING_PATHWAY	-0.658263	1
BIOCARTA_TNFR2_PATHWAY	-0.657072	1
REACTOME_ANTIGEN_ACTIVATES_B_CELL_RECEPTOR_LEADING_TO_GENERATION_OF_SECOND_MESSENGERS	-0.656339	1
REACTOME_LATENT_INFECTION_OF_HOMO_SAPIENS_WITH_MYCOBACTERIUM_TUBERCULOSIS	-0.651654	1
REACTOME_YAP1_AND_WWTR1_TAZ_STIMULATED_GENE_EXPRESSION	-0.645267	1
BIOCARTA_ALK_PATHWAY	-0.642675	1
BIOCARTA_CXCR4_PATHWAY	-0.641405	1
PID_CIRCADIAN_PATHWAY	-0.635582	1
REACTOME_SEMAPHORIN_INTERACTIONS	-0.630202	1
REACTOME_EFFECTS_OF_PIP2_HYDROLYSIS	-0.626243	1
REACTOME_RIP_MEDIATED_NFKB_ACTIVATION_VIA_DAI	-0.619745	1
KEGG_THYROID_CANCER	-0.614024	1
KEGG_GLYCOSAMINOGLYCAN_BIOSYNTHESIS_CHONDROITIN_SULFATE	-0.611921	1
BIOCARTA_PPARA_PATHWAY	-0.597052	1
REACTOME_KERATAN_SULFATE_KERATIN_METABOLISM	-0.594552	1
REACTOME_TAK1_ACTIVATES_NFKB_BY_PHOSPHORYLATION_AND_ACTIVATION_OF_IKKS_COMPLEX	-0.59444	1
REACTOME_HDL_MEDIATED_LIPID_TRANSPORT	-0.580656	1
BIOCARTA_SHH_PATHWAY	-0.567264	1
REACTOME_GLYCOSPHINGOLIPID_METABOLISM	-0.55547	1
REACTOME_GLUTAMATE_NEUROTRANSMITTER_RELEASE_CYCLE	-0.553727	1
REACTOME_PYRIMIDINE_METABOLISM	-0.546845	1
REACTOME_SEMA4D_IN_SEMAPHORIN_SIGNALING	-0.543875	1
PID_BMP_PATHWAY	-0.536585	1
REACTOME_IL1_SIGNALING	-0.53398	1
KEGG_PROXIMAL_TUBULE_BICARBONATE_RECLAMATION	-0.526781	1
PID_ALK1_PATHWAY	-0.469312	1
PID_NFKAPPAB_CANONICAL_PATHWAY	-0.468402	1
BIOCARTA_TALL1_PATHWAY	-0.466363	1
BIOCARTA_TGFB_PATHWAY	-0.407696	0.999494

## Sheet: Down-Regulated Pathway Terms
Canonical Pathway Term	NES	FDR p-value
REACTOME_RESPIRATORY_ELECTRON_TRANSPORT	2.80283	0
REACTOME_RESPIRATORY_ELECTRON_TRANSPORT_ATP_SYNTHESIS_BY_CHEMIOSMOTIC_COUPLING_AND_HEAT_PRODUCTION_BY_UNCOUPLING_PROTEINS_	2.73526	0
REACTOME_TCA_CYCLE_AND_RESPIRATORY_ELECTRON_TRANSPORT	2.71547	0
REACTOME_RNA_POL_II_TRANSCRIPTION	2.70194	0
REACTOME_LATE_PHASE_OF_HIV_LIFE_CYCLE	2.63873	0
REACTOME_DNA_REPLICATION	2.58108	0
REACTOME_MRNA_PROCESSING	2.56778	0
REACTOME_RNA_POL_II_PRE_TRANSCRIPTION_EVENTS	2.55795	0
REACTOME_MITOTIC_M_M_G1_PHASES	2.54129	0
REACTOME_DNA_REPAIR	2.52759	0
REACTOME_ACTIVATION_OF_ATR_IN_RESPONSE_TO_REPLICATION_STRESS	2.5095	0
REACTOME_TRANSCRIPTION_COUPLED_NER_TC_NER	2.50461	0
REACTOME_NUCLEOTIDE_EXCISION_REPAIR	2.50115	0
KEGG_NUCLEOTIDE_EXCISION_REPAIR	2.48582	0
REACTOME_MRNA_SPLICING	2.48443	0
REACTOME_G2_M_CHECKPOINTS	2.46528	0
REACTOME_PROCESSING_OF_CAPPED_INTRON_CONTAINING_PRE_MRNA	2.4609	0
REACTOME_S_PHASE	2.44663	0
REACTOME_ACTIVATION_OF_THE_PRE_REPLICATIVE_COMPLEX	2.44367	0
REACTOME_TRANSCRIPTION	2.43879	0
REACTOME_G1_S_TRANSITION	2.42405	0.000123955
REACTOME_CELL_CYCLE_MITOTIC	2.42175	0.000118321
REACTOME_MRNA_SPLICING_MINOR_PATHWAY	2.41981	0.000113176
REACTOME_RNA_POL_II_TRANSCRIPTION_PRE_INITIATION_AND_PROMOTER_OPENING	2.41809	0.000108461
REACTOME_MITOTIC_PROMETAPHASE	2.412	0.000209859
REACTOME_CELL_CYCLE_CHECKPOINTS	2.40885	0.000201787
REACTOME_TRANSLATION	2.40556	0.000194313
REACTOME_CELL_CYCLE	2.39538	0.000187374
REACTOME_FORMATION_OF_RNA_POL_II_ELONGATION_COMPLEX_	2.39326	0.000180913
REACTOME_MRNA_CAPPING	2.38087	0.000174882
KEGG_SPLICEOSOME	2.37835	0.000169241
REACTOME_FORMATION_OF_TRANSCRIPTION_COUPLED_NER_TC_NER_REPAIR_COMPLEX	2.36836	0.000163952
KEGG_HUNTINGTONS_DISEASE	2.3669	0.000158984
KEGG_DNA_REPLICATION	2.36291	0.000154308
KEGG_OXIDATIVE_PHOSPHORYLATION	2.35684	0.000149899
REACTOME_MITOCHONDRIAL_PROTEIN_IMPORT	2.34202	0.000215384
REACTOME_HIV_LIFE_CYCLE	2.33474	0.000209563
REACTOME_DNA_STRAND_ELONGATION	2.32765	0.000204048
REACTOME_SYNTHESIS_OF_DNA	2.32613	0.000198816
REACTOME_M_G1_TRANSITION	2.32203	0.000193845
PID_P53_REGULATION_PATHWAY	2.31754	0.000189117
KEGG_AMINOACYL_TRNA_BIOSYNTHESIS	2.29512	0.000240997
REACTOME_ELONGATION_ARREST_AND_RECOVERY	2.26533	0.000297106
REACTOME_CYTOSOLIC_TRNA_AMINOACYLATION	2.26531	0.000290354
REACTOME_GENERIC_TRANSCRIPTION_PATHWAY	2.26434	0.000283902
REACTOME_MITOTIC_G1_G1_S_PHASES	2.26188	0.00027773
REACTOME_METABOLISM_OF_RNA	2.25422	0.000385826
REACTOME_FORMATION_OF_THE_HIV1_EARLY_ELONGATION_COMPLEX	2.25237	0.000377788
REACTOME_FORMATION_OF_INCISION_COMPLEX_IN_GG_NER	2.24945	0.000476733
REACTOME_GLOBAL_GENOMIC_NER_GG_NER	2.23992	0.000467198
REACTOME_INFLUENZA_VIRAL_RNA_TRANSCRIPTION_AND_REPLICATION	2.23563	0.000458037
REACTOME_TRNA_AMINOACYLATION	2.23036	0.00050298
PID_NFAT_3PATHWAY	2.23005	0.00049349
BIOCARTA_PTDINS_PATHWAY	2.21709	0.000676591
KEGG_LYSINE_DEGRADATION	2.21081	0.000712166
REACTOME_3_UTR_MEDIATED_TRANSLATIONAL_REGULATION	2.20195	0.000845986
PID_ATM_PATHWAY	2.18956	0.000925253
REACTOME_CITRIC_ACID_CYCLE_TCA_CYCLE	2.18923	0.0009093
REACTOME_NONSENSE_MEDIATED_DECAY_ENHANCED_BY_THE_EXON_JUNCTION_COMPLEX	2.18607	0.000893888
REACTOME_UNFOLDED_PROTEIN_RESPONSE	2.18504	0.00087899
BIOCARTA_MCM_PATHWAY	2.18173	0.000947176
PID_S1P_S1P2_PATHWAY	2.17808	0.000973252
KEGG_BASE_EXCISION_REPAIR	2.17565	0.00100059
REACTOME_CLEAVAGE_OF_GROWING_TRANSCRIPT_IN_THE_TERMINATION_REGION_	2.17101	0.00102658
KEGG_RNA_POLYMERASE	2.16588	0.00101079
REACTOME_INFLUENZA_LIFE_CYCLE	2.16193	0.000995475
BIOCARTA_BCELLSURVIVAL_PATHWAY	2.16036	0.00101888
REACTOME_METABOLISM_OF_MRNA	2.15262	0.0011659
KEGG_VALINE_LEUCINE_AND_ISOLEUCINE_DEGRADATION	2.15195	0.001149
REACTOME_ABORTIVE_ELONGATION_OF_HIV1_TRANSCRIPT_IN_THE_ABSENCE_OF_TAT	2.14222	0.00128638
PID_ERBB2_ERBB3_PATHWAY	2.13302	0.00145313
REACTOME_LAGGING_STRAND_SYNTHESIS	2.12398	0.00154442
REACTOME_ORC1_REMOVAL_FROM_CHROMATIN	2.11965	0.00159665
REACTOME_PYRUVATE_METABOLISM_AND_CITRIC_ACID_TCA_CYCLE	2.11311	0.00160871
REACTOME_PROCESSIVE_SYNTHESIS_ON_THE_LAGGING_STRAND	2.10809	0.00169166
BIOCARTA_ARAP_PATHWAY	2.10307	0.00180761
BIOCARTA_RACCYCD_PATHWAY	2.10086	0.00182058
BIOCARTA_CERAMIDE_PATHWAY	2.09551	0.00190037
REACTOME_PROCESSING_OF_CAPPED_INTRONLESS_PRE_MRNA	2.09183	0.00191043
REACTOME_ASSEMBLY_OF_THE_PRE_REPLICATIVE_COMPLEX	2.09005	0.00198499
REACTOME_METABOLISM_OF_NON_CODING_RNA	2.08472	0.00209659
PID_CDC42_PATHWAY	2.08134	0.00213851
REACTOME_SRP_DEPENDENT_COTRANSLATIONAL_PROTEIN_TARGETING_TO_MEMBRANE	2.08078	0.00214423
KEGG_RIBOSOME	2.07744	0.00224952
BIOCARTA_IGF1R_PATHWAY	2.06903	0.0023493
KEGG_BASAL_TRANSCRIPTION_FACTORS	2.06681	0.00232199
REACTOME_HIV_INFECTION	2.06146	0.00241495
REACTOME_GAB1_SIGNALOSOME	2.04779	0.00281056
BIOCARTA_RAS_PATHWAY	2.02529	0.00368458
REACTOME_INTRINSIC_PATHWAY_FOR_APOPTOSIS	2.02202	0.00376247
REACTOME_PEPTIDE_CHAIN_ELONGATION	2.01846	0.0038171
REACTOME_SYNTHESIS_AND_INTERCONVERSION_OF_NUCLEOTIDE_DI_AND_TRIPHOSPHATES	2.01824	0.00377561
REACTOME_PERK_REGULATED_GENE_EXPRESSION	2.01623	0.00376311
REACTOME_E2F_MEDIATED_REGULATION_OF_DNA_REPLICATION	1.99872	0.00477988
BIOCARTA_NDKDYNAMIN_PATHWAY	1.99789	0.00478857
REACTOME_DESTABILIZATION_OF_MRNA_BY_KSRP	1.99509	0.00488136
BIOCARTA_EIF4_PATHWAY	1.99282	0.0049103
PID_FANCONI_PATHWAY	1.99074	0.00499872
PID_CDC42_REG_PATHWAY	1.98868	0.00499993
PID_RETINOIC_ACID_PATHWAY	1.98489	0.00519488
REACTOME_RECYCLING_PATHWAY_OF_L1	1.97898	0.00553559
KEGG_ENDOCYTOSIS	1.97538	0.0057177
REACTOME_ACTIVATION_OF_GENES_BY_ATF4	1.97469	0.00573801
BIOCARTA_P53_PATHWAY	1.97419	0.0057336
KEGG_CELL_CYCLE	1.97292	0.005679
BIOCARTA_GPCR_PATHWAY	1.97271	0.00562542
REACTOME_BRANCHED_CHAIN_AMINO_ACID_CATABOLISM	1.97036	0.00579161
PID_NEPHRIN_NEPH1_PATHWAY	1.96764	0.00580995
REACTOME_DEADENYLATION_DEPENDENT_MRNA_DECAY	1.9604	0.00609626
REACTOME_SIGNALING_BY_EGFR_IN_CANCER	1.95839	0.00608719
REACTOME_MRNA_3_END_PROCESSING	1.94271	0.00711205
REACTOME_CHROMOSOME_MAINTENANCE	1.9394	0.00726637
PID_E2F_PATHWAY	1.9371	0.0072961
REACTOME_DOUBLE_STRAND_BREAK_REPAIR	1.93272	0.00763086
REACTOME_PI3K_AKT_ACTIVATION	1.93148	0.00763311
KEGG_RNA_DEGRADATION	1.9302	0.00770489
REACTOME_MEIOSIS	1.92374	0.00818216
KEGG_AMINO_SUGAR_AND_NUCLEOTIDE_SUGAR_METABOLISM	1.92365	0.00811282
PID_IGF1_PATHWAY	1.92291	0.00804464
KEGG_CITRATE_CYCLE_TCA_CYCLE	1.92179	0.0080447
BIOCARTA_FCER1_PATHWAY	1.91937	0.00821646
REACTOME_ACTIVATION_OF_THE_MRNA_UPON_BINDING_OF_THE_CAP_BINDING_COMPLEX_AND_EIFS_AND_SUBSEQUENT_BINDING_TO_43S	1.91552	0.00841328
REACTOME_FATTY_ACYL_COA_BIOSYNTHESIS	1.91066	0.00879259
BIOCARTA_CHEMICAL_PATHWAY	1.90505	0.00908887
REACTOME_REGULATION_OF_MITOTIC_CELL_CYCLE	1.90282	0.00918137
REACTOME_PIP3_ACTIVATES_AKT_SIGNALING	1.90271	0.0091085
REACTOME_ACTIVATION_OF_CHAPERONE_GENES_BY_XBP1S	1.9019	0.00910259
KEGG_PARKINSONS_DISEASE	1.90189	0.00903147
REACTOME_VIF_MEDIATED_DEGRADATION_OF_APOBEC3G	1.89852	0.00916428
REACTOME_NGF_SIGNALLING_VIA_TRKA_FROM_THE_PLASMA_MEMBRANE	1.89457	0.00946193
PID_HEDGEHOG_GLI_PATHWAY	1.88866	0.00993613
REACTOME_PROTEOLYTIC_CLEAVAGE_OF_SNARE_COMPLEX_PROTEINS	1.88834	0.00988103
PID_ATR_PATHWAY	1.88829	0.00980674
BIOCARTA_GLEEVEC_PATHWAY	1.88791	0.0098333
REACTOME_DOWNSTREAM_SIGNAL_TRANSDUCTION	1.8875	0.00977974
REACTOME_BASE_EXCISION_REPAIR	1.88277	0.0100069
REACTOME_CDT1_ASSOCIATION_WITH_THE_CDC6_ORC_ORIGIN_COMPLEX	1.87666	0.0104782
PID_SMAD2_3PATHWAY	1.87087	0.0113099
REACTOME_EXTENSION_OF_TELOMERES	1.8692	0.0113049
REACTOME_G1_S_SPECIFIC_TRANSCRIPTION	1.86914	0.0112421
REACTOME_RESOLUTION_OF_AP_SITES_VIA_THE_MULTIPLE_NUCLEOTIDE_PATCH_REPLACEMENT_PATHWAY	1.86283	0.0118001
REACTOME_RNA_POL_I_TRANSCRIPTION	1.85803	0.0121882
REACTOME_RNA_POL_I_RNA_POL_III_AND_MITOCHONDRIAL_TRANSCRIPTION	1.85532	0.0124185
KEGG_MISMATCH_REPAIR	1.85274	0.0125595
BIOCARTA_MITOCHONDRIA_PATHWAY	1.84666	0.0131806
REACTOME_EGFR_DOWNREGULATION	1.83577	0.0143413
REACTOME_MEIOTIC_RECOMBINATION	1.8356	0.0142438
REACTOME_APC_CDC20_MEDIATED_DEGRADATION_OF_NEK2A	1.83559	0.0141475
KEGG_ACUTE_MYELOID_LEUKEMIA	1.83506	0.0140895
REACTOME_AUTODEGRADATION_OF_CDH1_BY_CDH1_APC_C	1.83307	0.0142422
PID_ERBB1_DOWNSTREAM_PATHWAY	1.83278	0.0141667
REACTOME_APC_C_CDC20_MEDIATED_DEGRADATION_OF_MITOTIC_PROTEINS	1.83239	0.0140735
REACTOME_INHIBITION_OF_THE_PROTEOLYTIC_ACTIVITY_OF_APC_C_REQUIRED_FOR_THE_ONSET_OF_ANAPHASE_BY_MITOTIC_SPINDLE_CHECKPOINT_COMPONENTS	1.83186	0.0139975
REACTOME_SYNTHESIS_OF_PIPS_AT_THE_GOLGI_MEMBRANE	1.82647	0.0144107
BIOCARTA_CHREBP2_PATHWAY	1.8245	0.0144668
PID_ARF_3PATHWAY	1.82039	0.0148885
REACTOME_CYCLIN_E_ASSOCIATED_EVENTS_DURING_G1_S_TRANSITION_	1.81426	0.0157409
REACTOME_RNA_POL_I_TRANSCRIPTION_INITIATION	1.80991	0.0161942
REACTOME_HOMOLOGOUS_RECOMBINATION_REPAIR_OF_REPLICATION_INDEPENDENT_DOUBLE_STRAND_BREAKS	1.80789	0.0163577
REACTOME_SCFSKP2_MEDIATED_DEGRADATION_OF_P27_P21	1.80479	0.016771
REACTOME_ER_PHAGOSOME_PATHWAY	1.80342	0.0168841
REACTOME_APC_C_CDH1_MEDIATED_DEGRADATION_OF_CDC20_AND_OTHER_APC_C_CDH1_TARGETED_PROTEINS_IN_LATE_MITOSIS_EARLY_G1	1.80031	0.0170907
REACTOME_SYNTHESIS_OF_GLYCOSYLPHOSPHATIDYLINOSITOL_GPI	1.79892	0.0173095
REACTOME_MITOCHONDRIAL_TRNA_AMINOACYLATION	1.79835	0.0172382
BIOCARTA_PYK2_PATHWAY	1.79347	0.0178112
PID_THROMBIN_PAR1_PATHWAY	1.79324	0.0177186
BIOCARTA_TFF_PATHWAY	1.78606	0.0186293
SIG_IL4RECEPTOR_IN_B_LYPHOCYTES	1.77733	0.0197437
REACTOME_APOPTOSIS	1.77704	0.0196732
REACTOME_PEROXISOMAL_LIPID_METABOLISM	1.77564	0.0197748
REACTOME_GLYCOGEN_BREAKDOWN_GLYCOGENOLYSIS	1.77434	0.0197367
PID_ECADHERIN_NASCENT_AJ_PATHWAY	1.77323	0.0197778
REACTOME_TRANS_GOLGI_NETWORK_VESICLE_BUDDING	1.76219	0.0211887
REACTOME_SIGNALING_BY_ERBB2	1.75993	0.021574
REACTOME_RNA_POL_I_TRANSCRIPTION_TERMINATION	1.75513	0.0222923
KEGG_ALZHEIMERS_DISEASE	1.74238	0.0247151
PID_PI3K_PLC_TRK_PATHWAY	1.73712	0.0255028
REACTOME_FORMATION_OF_THE_TERNARY_COMPLEX_AND_SUBSEQUENTLY_THE_43S_COMPLEX	1.73612	0.0254653
PID_TRAIL_PATHWAY	1.73296	0.0258941
REACTOME_TELOMERE_MAINTENANCE	1.73121	0.0261409
BIOCARTA_IGF1MTOR_PATHWAY	1.73121	0.0259965
REACTOME_BOTULINUM_NEUROTOXICITY	1.72996	0.0261134
KEGG_COLORECTAL_CANCER	1.72972	0.0260131
BIOCARTA_ERK_PATHWAY	1.7293	0.0259585
REACTOME_RNA_POL_III_TRANSCRIPTION_INITIATION_FROM_TYPE_2_PROMOTER	1.72884	0.0258911
REACTOME_REGULATION_OF_MRNA_STABILITY_BY_PROTEINS_THAT_BIND_AU_RICH_ELEMENTS	1.72637	0.0261327
REACTOME_RNA_POL_III_CHAIN_ELONGATION	1.72346	0.026459
KEGG_PROTEIN_EXPORT	1.71935	0.0271189
PID_EPHA2_FWD_PATHWAY	1.7172	0.027384
PID_MTOR_4PATHWAY	1.71664	0.0273792
KEGG_INOSITOL_PHOSPHATE_METABOLISM	1.71596	0.0273891
PID_BARD1_PATHWAY	1.71528	0.0273454
REACTOME_APC_C_CDC20_MEDIATED_DEGRADATION_OF_CYCLIN_B	1.71317	0.0275753
KEGG_SNARE_INTERACTIONS_IN_VESICULAR_TRANSPORT	1.7129	0.0274877
KEGG_OOCYTE_MEIOSIS	1.71091	0.0277029
PID_TXA2PATHWAY	1.70871	0.0280857
REACTOME_TRANSPORT_OF_MATURE_TRANSCRIPT_TO_CYTOPLASM	1.70774	0.0281486
BIOCARTA_CREB_PATHWAY	1.70687	0.0282325
REACTOME_DESTABILIZATION_OF_MRNA_BY_BRF1	1.70643	0.0281715
REACTOME_G0_AND_EARLY_G1	1.70567	0.0280704
PID_MET_PATHWAY	1.70351	0.0284257
BIOCARTA_EGF_PATHWAY	1.70034	0.0290726
KEGG_SELENOAMINO_ACID_METABOLISM	1.69981	0.0289939
REACTOME_APOPTOTIC_CLEAVAGE_OF_CELLULAR_PROTEINS	1.69332	0.0301591
BIOCARTA_BARRESTIN_SRC_PATHWAY	1.693	0.0300891
PID_AURORA_A_PATHWAY	1.69209	0.0301353
PID_TELOMERASE_PATHWAY	1.69086	0.0302572
REACTOME_PHOSPHORYLATION_OF_THE_APC_C	1.69009	0.0302757
BIOCARTA_BIOPEPTIDES_PATHWAY	1.68942	0.0302691
REACTOME_SULFUR_AMINO_ACID_METABOLISM	1.68929	0.0301394
REACTOME_PI3K_EVENTS_IN_ERBB2_SIGNALING	1.68893	0.0300214
REACTOME_MEMBRANE_TRAFFICKING	1.68707	0.0303511
REACTOME_KINESINS	1.6869	0.0302456
REACTOME_PLC_BETA_MEDIATED_EVENTS	1.6842	0.0307237
PID_LKB1_PATHWAY	1.68243	0.031053
KEGG_ERBB_SIGNALING_PATHWAY	1.67884	0.0316771
REACTOME_METABOLISM_OF_PROTEINS	1.67457	0.0325732
PID_P73PATHWAY	1.67154	0.0330142
BIOCARTA_BAD_PATHWAY	1.67036	0.0330706
PID_RXR_VDR_PATHWAY	1.66824	0.0331965
ST_PHOSPHOINOSITIDE_3_KINASE_PATHWAY	1.66823	0.0330463
REACTOME_SIGNALING_BY_FGFR_IN_DISEASE	1.668	0.0329683
KEGG_PROGESTERONE_MEDIATED_OOCYTE_MATURATION	1.6597	0.0349846
BIOCARTA_RARRXR_PATHWAY	1.65511	0.0360135
KEGG_PROPANOATE_METABOLISM	1.6549	0.0358899
ST_GA12_PATHWAY	1.65429	0.0359543
REACTOME_DESTABILIZATION_OF_MRNA_BY_TRISTETRAPROLIN_TTP	1.64941	0.0367504
REACTOME_P53_DEPENDENT_G1_DNA_DAMAGE_RESPONSE	1.64882	0.036754
REACTOME_P53_INDEPENDENT_G1_S_DNA_DAMAGE_CHECKPOINT	1.6481	0.0367693
PID_PI3KCI_AKT_PATHWAY	1.64627	0.0370355
KEGG_PHOSPHATIDYLINOSITOL_SIGNALING_SYSTEM	1.64457	0.0373155
REACTOME_DARPP_32_EVENTS	1.63907	0.0387632
BIOCARTA_ATRBRCA_PATHWAY	1.63799	0.0388414
REACTOME_ACTIVATION_OF_BH3_ONLY_PROTEINS	1.63725	0.0388009
PID_AR_NONGENOMIC_PATHWAY	1.63573	0.0390082
REACTOME_SIGNALING_BY_FGFR1_FUSION_MUTANTS	1.63111	0.040078
REACTOME_SIGNALLING_BY_NGF	1.63046	0.0400519
BIOCARTA_PDGF_PATHWAY	1.62968	0.0400685
KEGG_GLIOMA	1.62766	0.040424
BIOCARTA_AKT_PATHWAY	1.62389	0.0412855
REACTOME_SIGNALING_BY_HIPPO	1.62309	0.0413096
BIOCARTA_DEATH_PATHWAY	1.6208	0.0418403
REACTOME_CDK_MEDIATED_PHOSPHORYLATION_AND_REMOVAL_OF_CDC6	1.61966	0.0420858
REACTOME_METABOLISM_OF_VITAMINS_AND_COFACTORS	1.61695	0.0426203
REACTOME_FATTY_ACID_TRIACYLGLYCEROL_AND_KETONE_BODY_METABOLISM	1.61674	0.0425214
PID_RB_1PATHWAY	1.61634	0.0424142
PID_WNT_NONCANONICAL_PATHWAY	1.61098	0.043933
REACTOME_CLASS_I_MHC_MEDIATED_ANTIGEN_PROCESSING_PRESENTATION	1.61068	0.0438511
KEGG_UBIQUITIN_MEDIATED_PROTEOLYSIS	1.60868	0.0441597
ST_FAS_SIGNALING_PATHWAY	1.60818	0.0441442
REACTOME_SCF_BETA_TRCP_MEDIATED_DEGRADATION_OF_EMI1	1.6079	0.0440318
PID_FOXM1_PATHWAY	1.60675	0.0442525
PID_CERAMIDE_PATHWAY	1.60666	0.0440883
REACTOME_DESTABILIZATION_OF_MRNA_BY_AUF1_HNRNP_D0	1.60557	0.0442192
REACTOME_DOWNSTREAM_SIGNALING_EVENTS_OF_B_CELL_RECEPTOR_BCR	1.59856	0.0460875
REACTOME_SIGNALING_BY_FGFR	1.59773	0.046127
REACTOME_TRANSPORT_OF_MATURE_MRNA_DERIVED_FROM_AN_INTRONLESS_TRANSCRIPT	1.59406	0.0471272
PID_VEGFR1_2_PATHWAY	1.59071	0.0481511
REACTOME_AMINO_ACID_SYNTHESIS_AND_INTERCONVERSION_TRANSAMINATION	1.58869	0.0484187
BIOCARTA_MTOR_PATHWAY	1.58605	0.0490463
REACTOME_ANTIGEN_PRESENTATION_FOLDING_ASSEMBLY_AND_PEPTIDE_LOADING_OF_CLASS_I_MHC	1.58165	0.0502225
KEGG_P53_SIGNALING_PATHWAY	1.57887	0.0508436
REACTOME_ANTIGEN_PROCESSING_UBIQUITINATION_PROTEASOME_DEGRADATION	1.57676	0.0512753
KEGG_GLYCOSYLPHOSPHATIDYLINOSITOL_GPI_ANCHOR_BIOSYNTHESIS	1.57372	0.052109
KEGG_INSULIN_SIGNALING_PATHWAY	1.57344	0.0520026
REACTOME_GOLGI_ASSOCIATED_VESICLE_BIOGENESIS	1.5721	0.0522488
PID_ECADHERIN_KERATINOCYTE_PATHWAY	1.57103	0.0524835
REACTOME_DEADENYLATION_OF_MRNA	1.56498	0.0546641
BIOCARTA_AT1R_PATHWAY	1.56471	0.0545855
BIOCARTA_BCR_PATHWAY	1.56459	0.0544028
KEGG_FRUCTOSE_AND_MANNOSE_METABOLISM	1.55906	0.0563147
REACTOME_SIGNALING_BY_SCF_KIT	1.55901	0.0561163
PID_PLK1_PATHWAY	1.55772	0.0563658
KEGG_FATTY_ACID_METABOLISM	1.55607	0.0567379
REACTOME_PI_METABOLISM	1.55584	0.0566075
BIOCARTA_MAPK_PATHWAY	1.55379	0.0570699
KEGG_PORPHYRIN_AND_CHLOROPHYLL_METABOLISM	1.55291	0.0571244
REACTOME_SIGNALING_BY_WNT	1.55261	0.0570438
REACTOME_ENDOSOMAL_SORTING_COMPLEX_REQUIRED_FOR_TRANSPORT_ESCRT	1.55155	0.0572722
KEGG_ALANINE_ASPARTATE_AND_GLUTAMATE_METABOLISM	1.55086	0.0573414
REACTOME_DOWNSTREAM_SIGNALING_OF_ACTIVATED_FGFR	1.55038	0.0572608
KEGG_NON_SMALL_CELL_LUNG_CANCER	1.54502	0.0591247
BIOCARTA_NGF_PATHWAY	1.54091	0.0604586
REACTOME_METABOLISM_OF_AMINO_ACIDS_AND_DERIVATIVES	1.53872	0.0609616
BIOCARTA_FAS_PATHWAY	1.53463	0.0625487
PID_ARF6_DOWNSTREAM_PATHWAY	1.53379	0.0626113
SA_B_CELL_RECEPTOR_COMPLEXES	1.53369	0.0624101
REACTOME_POST_TRANSLATIONAL_MODIFICATION_SYNTHESIS_OF_GPI_ANCHORED_PROTEINS	1.5311	0.0631736
REACTOME_RNA_POL_III_TRANSCRIPTION_TERMINATION	1.53094	0.0631014
KEGG_PYRIMIDINE_METABOLISM	1.53019	0.0631842
REACTOME_GLUCOSE_METABOLISM	1.52947	0.0632583
KEGG_HOMOLOGOUS_RECOMBINATION	1.5271	0.0640095
PID_S1P_META_PATHWAY	1.52394	0.0648739
REACTOME_PI_3K_CASCADE	1.52378	0.064734
SA_PTEN_PATHWAY	1.52134	0.0654331
REACTOME_CONVERSION_FROM_APC_C_CDC20_TO_APC_C_CDH1_IN_LATE_ANAPHASE	1.51735	0.0669563
KEGG_APOPTOSIS	1.51337	0.0684952
REACTOME_PKB_MEDIATED_EVENTS	1.51099	0.0693369
PID_RET_PATHWAY	1.50836	0.0703926
REACTOME_PI3K_EVENTS_IN_ERBB4_SIGNALING	1.50677	0.0708127
PID_ILK_PATHWAY	1.50631	0.0707548
REACTOME_ASPARAGINE_N_LINKED_GLYCOSYLATION	1.50412	0.0716294
REACTOME_SIGNALING_BY_PDGF	1.50341	0.0717848
BIOCARTA_G1_PATHWAY	1.5033	0.0715748
SIG_INSULIN_RECEPTOR_PATHWAY_IN_CARDIAC_MYOCYTES	1.49993	0.0730787
KEGG_GLYCINE_SERINE_AND_THREONINE_METABOLISM	1.49752	0.0740049
REACTOME_RNA_POL_III_TRANSCRIPTION	1.49632	0.0744467
REACTOME_NEP_NS2_INTERACTS_WITH_THE_CELLULAR_EXPORT_MACHINERY	1.4958	0.0744473
PID_RAC1_REG_PATHWAY	1.49556	0.0742845
REACTOME_APOPTOTIC_EXECUTION_PHASE	1.49499	0.074267
REACTOME_INTERACTIONS_OF_VPR_WITH_HOST_CELLULAR_PROTEINS	1.49185	0.0753847
PID_DNA_PK_PATHWAY	1.48986	0.0761216
PID_TRKR_PATHWAY	1.48632	0.0776931
KEGG_ENDOMETRIAL_CANCER	1.48553	0.0777579
REACTOME_MICRORNA_MIRNA_BIOGENESIS	1.48546	0.0775448
REACTOME_HOST_INTERACTIONS_OF_HIV_FACTORS	1.48473	0.077734
BIOCARTA_CALCINEURIN_PATHWAY	1.48417	0.0777366
REACTOME_TRANSPORT_TO_THE_GOLGI_AND_SUBSEQUENT_MODIFICATION	1.48189	0.0786892
PID_PDGFRB_PATHWAY	1.48107	0.0788907
PID_FAK_PATHWAY	1.47862	0.0799061
PID_ATF2_PATHWAY	1.47841	0.0798118
PID_FAS_PATHWAY	1.47802	0.0797417
BIOCARTA_SPRY_PATHWAY	1.47783	0.0795927
REACTOME_SIGNALING_BY_TGF_BETA_RECEPTOR_COMPLEX	1.47752	0.0795237
REACTOME_NRAGE_SIGNALS_DEATH_THROUGH_JNK	1.47583	0.0799697
KEGG_VIBRIO_CHOLERAE_INFECTION	1.47017	0.0827694
PID_ERBB1_INTERNALIZATION_PATHWAY	1.46897	0.0830681
KEGG_PANCREATIC_CANCER	1.46742	0.0835117
REACTOME_OPIOID_SIGNALLING	1.4672	0.0833787
KEGG_GLUTATHIONE_METABOLISM	1.46654	0.083383
REACTOME_NEPHRIN_INTERACTIONS	1.4658	0.0835355
BIOCARTA_PAR1_PATHWAY	1.46571	0.0833159
REACTOME_RNA_POL_I_PROMOTER_OPENING	1.4652	0.0833441
PID_FOXO_PATHWAY	1.4646	0.0834277
KEGG_PROSTATE_CANCER	1.46239	0.0843012
REACTOME_GLYCOLYSIS	1.46087	0.0847713
REACTOME_SIGNALING_BY_THE_B_CELL_RECEPTOR_BCR	1.45693	0.0865195
REACTOME_RNA_POL_III_TRANSCRIPTION_INITIATION_FROM_TYPE_3_PROMOTER	1.4511	0.0896214
REACTOME_FANCONI_ANEMIA_PATHWAY	1.45107	0.0893653
KEGG_BUTANOATE_METABOLISM	1.45088	0.089218
REACTOME_DEPOSITION_OF_NEW_CENPA_CONTAINING_NUCLEOSOMES_AT_THE_CENTROMERE	1.44815	0.0903833
REACTOME_METABOLISM_OF_NUCLEOTIDES	1.44657	0.0909902
REACTOME_REGULATION_OF_ORNITHINE_DECARBOXYLASE_ODC	1.44616	0.0909414
REACTOME_SIGNALING_BY_RHO_GTPASES	1.43917	0.0947142
BIOCARTA_MET_PATHWAY	1.43575	0.0963157
SA_TRKA_RECEPTOR	1.43502	0.0965545
ST_JNK_MAPK_PATHWAY	1.43352	0.0971903
REACTOME_AUTODEGRADATION_OF_THE_E3_UBIQUITIN_LIGASE_COP1	1.43231	0.0975185
BIOCARTA_ATM_PATHWAY	1.43122	0.0979039
BIOCARTA_HCMV_PATHWAY	1.42649	0.100222
SIG_BCR_SIGNALING_PATHWAY	1.4193	0.10442
KEGG_NEUROTROPHIN_SIGNALING_PATHWAY	1.41528	0.106881
BIOCARTA_41BB_PATHWAY	1.41444	0.107143
REACTOME_POST_NMDA_RECEPTOR_ACTIVATION_EVENTS	1.41254	0.10806
PID_INSULIN_GLUCOSE_PATHWAY	1.41165	0.108302
KEGG_PENTOSE_PHOSPHATE_PATHWAY	1.41124	0.108185
BIOCARTA_G2_PATHWAY	1.40515	0.11194
KEGG_CYSTEINE_AND_METHIONINE_METABOLISM	1.40392	0.11234
BIOCARTA_PROTEASOME_PATHWAY	1.40364	0.112218
PID_S1P_S1P3_PATHWAY	1.40089	0.113634
REACTOME_MEIOTIC_SYNAPSIS	1.40015	0.113784
PID_RAC1_PATHWAY	1.39839	0.114632
REACTOME_ANTIVIRAL_MECHANISM_BY_IFN_STIMULATED_GENES	1.39799	0.114591
PID_P38_MK2_PATHWAY	1.39781	0.114377
PID_IL8_CXCR1_PATHWAY	1.39709	0.114485
REACTOME_ACTIVATION_OF_NMDA_RECEPTOR_UPON_GLUTAMATE_BINDING_AND_POSTSYNAPTIC_EVENTS	1.39651	0.114573
REACTOME_PACKAGING_OF_TELOMERE_ENDS	1.39201	0.117314
BIOCARTA_FMLP_PATHWAY	1.3898	0.118483
REACTOME_REGULATION_OF_GLUCOKINASE_BY_GLUCOKINASE_REGULATORY_PROTEIN	1.38397	0.121938
BIOCARTA_ERK5_PATHWAY	1.37719	0.126255
REACTOME_G1_PHASE	1.3766	0.126397
REACTOME_ACTIVATION_OF_NF_KAPPAB_IN_B_CELLS	1.37509	0.127001
PID_INTEGRIN_A4B1_PATHWAY	1.37336	0.127978
KEGG_CHRONIC_MYELOID_LEUKEMIA	1.37322	0.127761
BIOCARTA_INTEGRIN_PATHWAY	1.36822	0.131021
PID_MYC_PATHWAY	1.36218	0.135212
PID_AURORA_B_PATHWAY	1.35698	0.138861
REACTOME_SIGNAL_TRANSDUCTION_BY_L1	1.35559	0.139594
REACTOME_ASSOCIATION_OF_TRIC_CCT_WITH_TARGET_PROTEINS_DURING_BIOSYNTHESIS	1.35296	0.141299
BIOCARTA_P53HYPOXIA_PATHWAY	1.35144	0.141961
PID_ENDOTHELIN_PATHWAY	1.34597	0.146143
REACTOME_SIGNALING_BY_FGFR1_MUTANTS	1.34487	0.146735
REACTOME_SIGNALLING_TO_ERKS	1.34468	0.146517
BIOCARTA_ECM_PATHWAY	1.34389	0.146815
REACTOME_ANTIGEN_PROCESSING_CROSS_PRESENTATION	1.343	0.147026
ST_G_ALPHA_I_PATHWAY	1.3408	0.148701
PID_LYSOPHOSPHOLIPID_PATHWAY	1.34012	0.148849
SA_CASPASE_CASCADE	1.33999	0.148562
BIOCARTA_TNFR1_PATHWAY	1.33946	0.148537
REACTOME_CTLA4_INHIBITORY_SIGNALING	1.33692	0.150298
KEGG_LYSOSOME	1.33572	0.15107
ST_GA13_PATHWAY	1.33391	0.152288
REACTOME_THROMBIN_SIGNALLING_THROUGH_PROTEINASE_ACTIVATED_RECEPTORS_PARS	1.33348	0.152175
PID_ARF6_PATHWAY	1.33027	0.154675
KEGG_LONG_TERM_POTENTIATION	1.32873	0.155325
ST_INTEGRIN_SIGNALING_PATHWAY	1.32811	0.155538
REACTOME_SIGNALLING_TO_RAS	1.32725	0.155919
BIOCARTA_WNT_PATHWAY	1.3264	0.156317
BIOCARTA_HER2_PATHWAY	1.3211	0.160348
PID_MYC_ACTIV_PATHWAY	1.32061	0.160317
ST_WNT_BETA_CATENIN_PATHWAY	1.3202	0.160283
REACTOME_SIGNALING_BY_CONSTITUTIVELY_ACTIVE_EGFR	1.31752	0.162343
BIOCARTA_KERATINOCYTE_PATHWAY	1.31606	0.163272
PID_AR_TF_PATHWAY	1.31495	0.163758
BIOCARTA_MPR_PATHWAY	1.312	0.165933
REACTOME_CA_DEPENDENT_EVENTS	1.3098	0.167622
REACTOME_CD28_CO_STIMULATION	1.30897	0.167991
REACTOME_CELL_DEATH_SIGNALLING_VIA_NRAGE_NRIF_AND_NADE	1.30839	0.168155
PID_IL8_CXCR2_PATHWAY	1.30614	0.169919
REACTOME_MITOTIC_G2_G2_M_PHASES	1.30515	0.170394
REACTOME_DAG_AND_IP3_SIGNALING	1.30439	0.170661
KEGG_EPITHELIAL_CELL_SIGNALING_IN_HELICOBACTER_PYLORI_INFECTION	1.30292	0.171647
REACTOME_RAP1_SIGNALLING	1.30276	0.171408
REACTOME_BIOSYNTHESIS_OF_THE_N_GLYCAN_PRECURSOR_DOLICHOL_LIPID_LINKED_OLIGOSACCHARIDE_LLO_AND_TRANSFER_TO_A_NASCENT_PROTEIN	1.298	0.175357
REACTOME_CYCLIN_A_B1_ASSOCIATED_EVENTS_DURING_G2_M_TRANSITION	1.29683	0.176008
BIOCARTA_VEGF_PATHWAY	1.29532	0.176841
PID_HDAC_CLASSI_PATHWAY	1.29205	0.179524
BIOCARTA_CELLCYCLE_PATHWAY	1.29195	0.17922
REACTOME_DOWNREGULATION_OF_SMAD2_3_SMAD4_TRANSCRIPTIONAL_ACTIVITY	1.2878	0.182937
REACTOME_REGULATORY_RNA_PATHWAYS	1.28498	0.185366
REACTOME_ENOS_ACTIVATION_AND_REGULATION	1.27986	0.190301
PID_IFNG_PATHWAY	1.27841	0.191299
REACTOME_CREB_PHOSPHORYLATION_THROUGH_THE_ACTIVATION_OF_RAS	1.27096	0.198492
BIOCARTA_TPO_PATHWAY	1.26799	0.201327
REACTOME_TRANSPORT_OF_RIBONUCLEOPROTEINS_INTO_THE_HOST_NUCLEUS	1.26781	0.201006
PID_CXCR3_PATHWAY	1.26431	0.204309
REACTOME_CROSS_PRESENTATION_OF_SOLUBLE_EXOGENOUS_ANTIGENS_ENDOSOMES	1.2642	0.204044
BIOCARTA_EPO_PATHWAY	1.25924	0.209257
REACTOME_SPHINGOLIPID_DE_NOVO_BIOSYNTHESIS	1.25893	0.209117
PID_FCER1_PATHWAY	1.25792	0.209832
PID_P38_MKK3_6PATHWAY	1.25668	0.210713
BIOCARTA_INSULIN_PATHWAY	1.25579	0.211209
BIOCARTA_RAC1_PATHWAY	1.25476	0.211733
REACTOME_TRANSCRIPTIONAL_REGULATION_OF_WHITE_ADIPOCYTE_DIFFERENTIATION	1.25302	0.213026
PID_INSULIN_PATHWAY	1.25297	0.212561
ST_B_CELL_ANTIGEN_RECEPTOR	1.25174	0.213497
PID_EPHB_FWD_PATHWAY	1.25017	0.214925
KEGG_ADHERENS_JUNCTION	1.24872	0.215975
REACTOME_SHC1_EVENTS_IN_EGFR_SIGNALING	1.24589	0.21864
REACTOME_PROTEIN_FOLDING	1.2444	0.219838
PID_KIT_PATHWAY	1.24184	0.222267
REACTOME_ACTIVATED_AMPK_STIMULATES_FATTY_ACID_OXIDATION_IN_MUSCLE	1.24113	0.222575
KEGG_RENAL_CELL_CARCINOMA	1.24049	0.222658
PID_LIS1_PATHWAY	1.23993	0.222653
PID_TAP63_PATHWAY	1.23689	0.225842
BIOCARTA_IGF1_PATHWAY	1.23555	0.227009
REACTOME_TRIGLYCERIDE_BIOSYNTHESIS	1.23524	0.226792
REACTOME_GLUCONEOGENESIS	1.23499	0.226582
REACTOME_TRANSCRIPTIONAL_ACTIVITY_OF_SMAD2_SMAD3_SMAD4_HETEROTRIMER	1.23364	0.227659
BIOCARTA_IL2RB_PATHWAY	1.2336	0.2272
KEGG_PROTEASOME	1.23102	0.229788
KEGG_PURINE_METABOLISM	1.22337	0.238451
REACTOME_SIGNALING_BY_ERBB4	1.21775	0.244738
BIOCARTA_PITX2_PATHWAY	1.2162	0.246054
BIOCARTA_AKAPCENTROSOME_PATHWAY	1.21525	0.246793
BIOCARTA_CARM_ER_PATHWAY	1.21296	0.249217
KEGG_GAP_JUNCTION	1.21177	0.250185
PID_ERBB1_RECEPTOR_PROXIMAL_PATHWAY	1.21014	0.251582
REACTOME_DIABETES_PATHWAYS	1.20932	0.25221
PID_MAPK_TRK_PATHWAY	1.20754	0.254038
REACTOME_SYNTHESIS_OF_PIPS_AT_THE_PLASMA_MEMBRANE	1.20516	0.256617
BIOCARTA_MEF2D_PATHWAY	1.20488	0.256404
BIOCARTA_CDC42RAC_PATHWAY	1.20467	0.256134
REACTOME_REGULATION_OF_SIGNALING_BY_CBL	1.19788	0.264581
BIOCARTA_EIF_PATHWAY	1.19294	0.270771
BIOCARTA_MYOSIN_PATHWAY	1.1921	0.271319
REACTOME_L1CAM_INTERACTIONS	1.19053	0.272908
BIOCARTA_HIVNEF_PATHWAY	1.18927	0.27389
PID_CASPASE_PATHWAY	1.18387	0.280547
REACTOME_RECRUITMENT_OF_MITOTIC_CENTROSOME_PROTEINS_AND_COMPLEXES	1.18373	0.280159
KEGG_PEROXISOME	1.18283	0.280765
BIOCARTA_EDG1_PATHWAY	1.18139	0.282321
REACTOME_REGULATION_OF_APOPTOSIS	1.17921	0.284719
REACTOME_MAP_KINASE_ACTIVATION_IN_TLR_CASCADE	1.17899	0.284438
REACTOME_SMAD2_SMAD3_SMAD4_HETEROTRIMER_REGULATES_TRANSCRIPTION	1.17866	0.28426
PID_PRL_SIGNALING_EVENTS_PATHWAY	1.17827	0.284258
KEGG_ONE_CARBON_POOL_BY_FOLATE	1.17817	0.28379
REACTOME_G_ALPHA1213_SIGNALLING_EVENTS	1.17788	0.283586
PID_SMAD2_3NUCLEAR_PATHWAY	1.176	0.285962
REACTOME_PURINE_METABOLISM	1.17519	0.286585
BIOCARTA_IL10_PATHWAY	1.17378	0.28802
REACTOME_JNK_C_JUN_KINASES_PHOSPHORYLATION_AND_ACTIVATION_MEDIATED_BY_ACTIVATED_HUMAN_TAK1	1.17168	0.29049
ST_GAQ_PATHWAY	1.17158	0.290047
REACTOME_N_GLYCAN_ANTENNAE_ELONGATION_IN_THE_MEDIAL_TRANS_GOLGI	1.17151	0.289583
PID_CXCR4_PATHWAY	1.16868	0.292734
SIG_CD40PATHWAYMAP	1.16723	0.294151
REACTOME_MAPK_TARGETS_NUCLEAR_EVENTS_MEDIATED_BY_MAP_KINASES	1.16404	0.297951
REACTOME_SIGNALING_BY_INSULIN_RECEPTOR	1.15522	0.310587
REACTOME_OXYGEN_DEPENDENT_PROLINE_HYDROXYLATION_OF_HYPOXIA_INDUCIBLE_FACTOR_ALPHA	1.15124	0.316013
SIG_PIP3_SIGNALING_IN_CARDIAC_MYOCTES	1.15086	0.315963
BIOCARTA_HDAC_PATHWAY	1.15037	0.316065
PID_BETA_CATENIN_DEG_PATHWAY	1.15019	0.315715
PID_RHOA_REG_PATHWAY	1.14907	0.316814
KEGG_WNT_SIGNALING_PATHWAY	1.14526	0.322185
BIOCARTA_GCR_PATHWAY	1.14204	0.32653
PID_TCPTP_PATHWAY	1.14088	0.327693
REACTOME_TRAFFICKING_OF_GLUR2_CONTAINING_AMPA_RECEPTORS	1.14029	0.328009
KEGG_MELANOMA	1.13981	0.328023
REACTOME_PHOSPHOLIPASE_C_MEDIATED_CASCADE	1.13832	0.329665
PID_A6B1_A6B4_INTEGRIN_PATHWAY	1.13823	0.329127
KEGG_TIGHT_JUNCTION	1.13099	0.339947
PID_P75_NTR_PATHWAY	1.13095	0.339343
KEGG_GNRH_SIGNALING_PATHWAY	1.12807	0.343369
KEGG_PYRUVATE_METABOLISM	1.12647	0.345143
BIOCARTA_VIP_PATHWAY	1.12585	0.345451
PID_ALPHA_SYNUCLEIN_PATHWAY	1.12409	0.347854
PID_P38_ALPHA_BETA_DOWNSTREAM_PATHWAY	1.12324	0.348724
REACTOME_NEGATIVE_REGULATORS_OF_RIG_I_MDA5_SIGNALING	1.11395	0.363807
KEGG_MTOR_SIGNALING_PATHWAY	1.11066	0.368914
ST_DIFFERENTIATION_PATHWAY_IN_PC12_CELLS	1.10915	0.37075
BIOCARTA_NFAT_PATHWAY	1.10289	0.380835
KEGG_FC_GAMMA_R_MEDIATED_PHAGOCYTOSIS	1.10081	0.383893
BIOCARTA_ACH_PATHWAY	1.09336	0.396899
PID_SYNDECAN_3_PATHWAY	1.09232	0.398113
KEGG_MELANOGENESIS	1.08753	0.406153
KEGG_N_GLYCAN_BIOSYNTHESIS	1.08559	0.408641
ST_GRANULE_CELL_SURVIVAL_PATHWAY	1.08237	0.413842
REACTOME_LYSOSOME_VESICLE_BIOGENESIS	1.08023	0.416975
REACTOME_TRAF6_MEDIATED_INDUCTION_OF_NFKB_AND_MAP_KINASES_UPON_TLR7_8_OR_9_ACTIVATION	1.0792	0.418141
PID_REELIN_PATHWAY	1.07879	0.418176
REACTOME_PYRUVATE_METABOLISM	1.07307	0.428498
REACTOME_PPARA_ACTIVATES_GENE_EXPRESSION	1.07199	0.429769
REACTOME_PROLONGED_ERK_ACTIVATION_EVENTS	1.07194	0.429063
PID_NETRIN_PATHWAY	1.07122	0.429586
BIOCARTA_UCALPAIN_PATHWAY	1.06965	0.431847
PID_WNT_CANONICAL_PATHWAY	1.06907	0.432306
KEGG_TYPE_II_DIABETES_MELLITUS	1.06668	0.43613
PID_HIF1A_PATHWAY	1.06567	0.437304
REACTOME_PHOSPHOLIPID_METABOLISM	1.06244	0.44311
REACTOME_GLUTATHIONE_CONJUGATION	1.06175	0.44359
REACTOME_G_PROTEIN_ACTIVATION	1.0592	0.447456
REACTOME_REGULATION_OF_KIT_SIGNALING	1.0586	0.44769
REACTOME_METABOLISM_OF_LIPIDS_AND_LIPOPROTEINS	1.05667	0.450863
BIOCARTA_CDMAC_PATHWAY	1.05618	0.450974
REACTOME_INSULIN_RECEPTOR_RECYCLING	1.05544	0.45166
REACTOME_NETRIN1_SIGNALING	1.05439	0.453001
PID_P38_ALPHA_BETA_PATHWAY	1.05321	0.454632
BIOCARTA_GH_PATHWAY	1.0525	0.455214
PID_IL2_1PATHWAY	1.04773	0.463691
REACTOME_CD28_DEPENDENT_PI3K_AKT_SIGNALING	1.04516	0.467877
REACTOME_G_ALPHA_Z_SIGNALLING_EVENTS	1.04438	0.468596
REACTOME_PI3K_CASCADE	1.04338	0.469728
REACTOME_INSULIN_RECEPTOR_SIGNALLING_CASCADE	1.04212	0.471685
BIOCARTA_TCR_PATHWAY	1.04082	0.473467
PID_IL6_7_PATHWAY	1.03883	0.476517
PID_EPO_PATHWAY	1.03747	0.478478
KEGG_T_CELL_RECEPTOR_SIGNALING_PATHWAY	1.03641	0.479775
REACTOME_ENERGY_DEPENDENT_REGULATION_OF_MTOR_BY_LKB1_AMPK	1.03264	0.487079
REACTOME_SHC_RELATED_EVENTS	1.03204	0.48737
PID_REG_GR_PATHWAY	1.03132	0.488065
PID_RHOA_PATHWAY	1.02764	0.494755
ST_G_ALPHA_S_PATHWAY	1.02753	0.494087
KEGG_MAPK_SIGNALING_PATHWAY	1.02595	0.496591
REACTOME_MYOGENESIS	1.02353	0.501163
KEGG_BIOSYNTHESIS_OF_UNSATURATED_FATTY_ACIDS	1.02144	0.504585
BIOCARTA_P38MAPK_PATHWAY	1.0196	0.507757
PID_S1P_S1P1_PATHWAY	1.01886	0.508339
KEGG_ASCORBATE_AND_ALDARATE_METABOLISM	1.01401	0.517624
KEGG_ADIPOCYTOKINE_SIGNALING_PATHWAY	1.01252	0.519814
REACTOME_IRON_UPTAKE_AND_TRANSPORT	1.00881	0.52681
KEGG_PATHWAYS_IN_CANCER	1.00881	0.525871
SIG_REGULATION_OF_THE_ACTIN_CYTOSKELETON_BY_RHO_GTPASES	1.00506	0.532825
REACTOME_RORA_ACTIVATES_CIRCADIAN_EXPRESSION	1.00412	0.533905
PID_EPHRINB_REV_PATHWAY	1.00163	0.538373
ST_ADRENERGIC	0.997348	0.546744
REACTOME_DEVELOPMENTAL_BIOLOGY	0.997152	0.546204
REACTOME_LOSS_OF_NLP_FROM_MITOTIC_CENTROSOMES	0.994018	0.552157
REACTOME_NFKB_AND_MAP_KINASES_ACTIVATION_MEDIATED_BY_TLR4_SIGNALING_REPERTOIRE	0.993573	0.552087
REACTOME_ACTIVATION_OF_KAINATE_RECEPTORS_UPON_GLUTAMATE_BINDING	0.993017	0.55225
BIOCARTA_RHO_PATHWAY	0.992613	0.552253
PID_EPHA_FWDPATHWAY	0.989058	0.559468
BIOCARTA_CD40_PATHWAY	0.986736	0.563689
KEGG_ARGININE_AND_PROLINE_METABOLISM	0.985888	0.564548
BIOCARTA_AGR_PATHWAY	0.985362	0.564629
REACTOME_P75_NTR_RECEPTOR_MEDIATED_SIGNALLING	0.983511	0.567741
BIOCARTA_ARF_PATHWAY	0.982009	0.570013
KEGG_HISTIDINE_METABOLISM	0.981974	0.569076
REACTOME_SHC_MEDIATED_SIGNALLING	0.976725	0.579446
KEGG_B_CELL_RECEPTOR_SIGNALING_PATHWAY	0.9755	0.581357
REACTOME_GPVI_MEDIATED_ACTIVATION_CASCADE	0.974696	0.582006
REACTOME_CELL_CELL_COMMUNICATION	0.97466	0.581049
REACTOME_MHC_CLASS_II_ANTIGEN_PRESENTATION	0.973252	0.583124
KEGG_GLYCOLYSIS_GLUCONEOGENESIS	0.971383	0.586057
REACTOME_REGULATION_OF_HYPOXIA_INDUCIBLE_FACTOR_HIF_BY_OXYGEN	0.967251	0.594422
KEGG_GLYOXYLATE_AND_DICARBOXYLATE_METABOLISM	0.965647	0.597158
REACTOME_POST_TRANSLATIONAL_PROTEIN_MODIFICATION	0.964749	0.598161
REACTOME_PREFOLDIN_MEDIATED_TRANSFER_OF_SUBSTRATE_TO_CCT_TRIC	0.964521	0.597666
PID_GMCSF_PATHWAY	0.96344	0.599103
REACTOME_MYD88_MAL_CASCADE_INITIATED_ON_PLASMA_MEMBRANE	0.961709	0.601853
PID_BCR_5PATHWAY	0.957623	0.609857
BIOCARTA_ETS_PATHWAY	0.956582	0.611155
BIOCARTA_MAL_PATHWAY	0.954538	0.614586
KEGG_VEGF_SIGNALING_PATHWAY	0.953743	0.615237
PID_HDAC_CLASSIII_PATHWAY	0.952567	0.616676
BIOCARTA_GATA3_PATHWAY	0.951831	0.617264
PID_BETA_CATENIN_NUC_PATHWAY	0.951279	0.617461
REACTOME_PKA_MEDIATED_PHOSPHORYLATION_OF_CREB	0.949942	0.619359
REACTOME_PHASE_II_CONJUGATION	0.946802	0.625193
PID_MYC_REPRESS_PATHWAY	0.94573	0.626504
REACTOME_AXON_GUIDANCE	0.945629	0.625695
PID_AR_PATHWAY	0.940056	0.636824
REACTOME_SYNTHESIS_SECRETION_AND_INACTIVATION_OF_GLP1	0.938879	0.63844
REACTOME_POST_CHAPERONIN_TUBULIN_FOLDING_PATHWAY	0.935058	0.645722
KEGG_VASOPRESSIN_REGULATED_WATER_REABSORPTION	0.933395	0.648223
REACTOME_ERK_MAPK_TARGETS	0.931621	0.651059
KEGG_TRYPTOPHAN_METABOLISM	0.926436	0.661702
PID_AJDISS_2PATHWAY	0.926339	0.66083
BIOCARTA_MCALPAIN_PATHWAY	0.926316	0.659792
PID_CD40_PATHWAY	0.925626	0.660267
REACTOME_SIGNALLING_TO_P38_VIA_RIT_AND_RIN	0.923696	0.663388
BIOCARTA_CCR3_PATHWAY	0.922158	0.665622
ST_ERK1_ERK2_MAPK_PATHWAY	0.918873	0.671604
REACTOME_HS_GAG_DEGRADATION	0.917407	0.673605
REACTOME_INTEGRATION_OF_ENERGY_METABOLISM	0.91712	0.673089
REACTOME_NUCLEAR_EVENTS_KINASE_AND_TRANSCRIPTION_FACTOR_ACTIVATION	0.916672	0.672893
REACTOME_CELL_JUNCTION_ORGANIZATION	0.913758	0.678238
REACTOME_REGULATION_OF_GENE_EXPRESSION_IN_BETA_CELLS	0.909986	0.685206
PID_ANGIOPOIETIN_RECEPTOR_PATHWAY	0.908428	0.687554
BIOCARTA_PGC1A_PATHWAY	0.90489	0.69381
KEGG_BETA_ALANINE_METABOLISM	0.904461	0.6936
REACTOME_TOLL_RECEPTOR_CASCADES	0.900803	0.700301
KEGG_TERPENOID_BACKBONE_BIOSYNTHESIS	0.897868	0.705291
BIOCARTA_ACTINY_PATHWAY	0.896292	0.707494
REACTOME_TRIF_MEDIATED_TLR3_SIGNALING	0.895834	0.707316
REACTOME_CTNNB1_PHOSPHORYLATION_CASCADE	0.889806	0.718662
REACTOME_ARMS_MEDIATED_ACTIVATION	0.88948	0.718172
REACTOME_PLATELET_SENSITIZATION_BY_LDL	0.886601	0.7232
REACTOME_G_PROTEIN_BETA_GAMMA_SIGNALLING	0.884607	0.726119
REACTOME_GLUCOSE_TRANSPORT	0.883002	0.728423
BIOCARTA_IL22BP_PATHWAY	0.873224	0.746922
REACTOME_INSULIN_SYNTHESIS_AND_PROCESSING	0.869246	0.753357
BIOCARTA_IL6_PATHWAY	0.867447	0.755643
KEGG_OTHER_GLYCAN_DEGRADATION	0.86696	0.755382
BIOCARTA_TOLL_PATHWAY	0.864868	0.758233
KEGG_SMALL_CELL_LUNG_CANCER	0.864325	0.758077
REACTOME_SPHINGOLIPID_METABOLISM	0.859824	0.765544
PID_TGFBR_PATHWAY	0.856484	0.770683
REACTOME_ACTIVATED_TLR4_SIGNALLING	0.856392	0.769664
BIOCARTA_STRESS_PATHWAY	0.854241	0.772666
REACTOME_NEGATIVE_REGULATION_OF_FGFR_SIGNALING	0.849195	0.781003
PID_PS1_PATHWAY	0.848867	0.780332
SIG_CHEMOTAXIS	0.834013	0.80614
KEGG_REGULATION_OF_ACTIN_CYTOSKELETON	0.831997	0.808559
REACTOME_SIGNALING_BY_FGFR_MUTANTS	0.829445	0.811606
ST_P38_MAPK_PATHWAY	0.827431	0.814047
REACTOME_G_BETA_GAMMA_SIGNALLING_THROUGH_PI3KGAMMA	0.826357	0.814884
KEGG_NITROGEN_METABOLISM	0.822874	0.81932
REACTOME_GRB2_EVENTS_IN_ERBB2_SIGNALING	0.816275	0.828972
BIOCARTA_NOS1_PATHWAY	0.811785	0.834905
REACTOME_FRS2_MEDIATED_CASCADE	0.811103	0.834717
REACTOME_METABOLISM_OF_CARBOHYDRATES	0.805319	0.842491
PID_PDGFRA_PATHWAY	0.799795	0.849804
BIOCARTA_PTEN_PATHWAY	0.789689	0.863667
PID_NECTIN_PATHWAY	0.78639	0.86731
KEGG_GALACTOSE_METABOLISM	0.774937	0.882289
BIOCARTA_RELA_PATHWAY	0.763753	0.895433
KEGG_PATHOGENIC_ESCHERICHIA_COLI_INFECTION	0.762529	0.895609
REACTOME_INCRETIN_SYNTHESIS_SECRETION_AND_INACTIVATION	0.758874	0.898675
BIOCARTA_HIF_PATHWAY	0.758366	0.897943
REACTOME_NUCLEAR_RECEPTOR_TRANSCRIPTION_PATHWAY	0.757084	0.898061
BIOCARTA_TID_PATHWAY	0.754956	0.899204
REACTOME_CHOLESTEROL_BIOSYNTHESIS	0.750482	0.90323
REACTOME_TRANSFERRIN_ENDOCYTOSIS_AND_RECYCLING	0.736857	0.917767
PID_RHODOPSIN_PATHWAY	0.734003	0.919444
PID_HIV_NEF_PATHWAY	0.733066	0.919006
REACTOME_TRAF6_MEDIATED_NFKB_ACTIVATION	0.726095	0.924638
REACTOME_PTM_GAMMA_CARBOXYLATION_HYPUSINE_FORMATION_AND_ARYLSULFATASE_ACTIVATION	0.720373	0.928622
SIG_PIP3_SIGNALING_IN_B_LYMPHOCYTES	0.717318	0.930192
REACTOME_ACTIVATED_TAK1_MEDIATES_P38_MAPK_ACTIVATION	0.704286	0.940052
KEGG_DORSO_VENTRAL_AXIS_FORMATION	0.70122	0.941128
KEGG_PENTOSE_AND_GLUCURONATE_INTERCONVERSIONS	0.691011	0.948208
PID_IL3_PATHWAY	0.687142	0.949656
REACTOME_SMOOTH_MUSCLE_CONTRACTION	0.687068	0.948309
REACTOME_CIRCADIAN_CLOCK	0.684436	0.948718
REACTOME_PRE_NOTCH_TRANSCRIPTION_AND_TRANSLATION	0.669836	0.957393
PID_NFKAPPAB_ATYPICAL_PATHWAY	0.659716	0.962152
BIOCARTA_SPPA_PATHWAY	0.632632	0.974685
REACTOME_CIRCADIAN_REPRESSION_OF_EXPRESSION_BY_REV_ERBA	0.631863	0.973567
REACTOME_SIGNALING_BY_NODAL	0.625725	0.974695
KEGG_STEROID_BIOSYNTHESIS	0.619014	0.975743
REACTOME_SEMA4D_INDUCED_CELL_MIGRATION_AND_GROWTH_CONE_COLLAPSE	0.601999	0.980527
BIOCARTA_CTCF_PATHWAY	0.537812	0.993258

## Sheet: Modules and Categories
Module Number	0	1	2	3	4	5	6	7	8	9	10	11	12	13	14	15	16	17	18	19	20	21	22	23	24
# Nodes	42	35	27	21	20	10	7	5	3	3	3	3	3	3	2	2	2	2	2	2	2	2	2	2	2
Percentage	0.2029	0.1691	0.1304	0.1014	0.0966	0.0483	0.0338	0.0242	0.0145	0.0145	0.0145	0.0145	0.0145	0.0145	0.0097	0.0097	0.0097	0.0097	0.0097	0.0097	0.0097	0.0097	0.0097	0.0097	0.0097
Category	Cell cycle, apoptosis	Oncogenic	Transcription, HIV life cycle	Cell cycle	Cell cycle, proteins, Influenza life cycle	Diseases	Neuroactive ligand-receptor interaction	Immune processes	Apoptosis	Apoptosis	Immune diseases	Metabolism, biosynthesis	Metabolism, biosynthesis	ECM	Cell cycle	Signaling events	Defensins, immune processes	ECM	Cytochrome P450	Apoptosis	Metabolism, biosynthesis	Catabolism	Complex proteins, transport	Olfactory transduction	Potassium channels
Terms	BIOCARTA_MCM_PATHWAY	BIOCARTA_BIOPEPTIDES_PATHWAY	KEGG_BASAL_TRANSCRIPTION_FACTORS	KEGG_BASE_EXCISION_REPAIR	KEGG_RIBOSOME	KEGG_ALZHEIMERS_DISEASE	KEGG_NEUROACTIVE_LIGAND_RECEPTOR_INTERACTION	KEGG_CYTOKINE_CYTOKINE_RECEPTOR_INTERACTION	BIOCARTA_CHEMICAL_PATHWAY	BIOCARTA_CERAMIDE_PATHWAY	KEGG_ASTHMA	KEGG_ALPHA_LINOLENIC_ACID_METABOLISM	KEGG_AMINOACYL_TRNA_BIOSYNTHESIS	NABA_ECM_REGULATORS	KEGG_OOCYTE_MEIOSIS	REACTOME_G_ALPHA_I_SIGNALLING_EVENTS	REACTOME_BETA_DEFENSINS	NABA_CORE_MATRISOME	REACTOME_CYTOCHROME_P450_ARRANGED_BY_SUBSTRATE_TYPE	PID_S1P_S1P2_PATHWAY	REACTOME_FATTY_ACID_TRIACYLGLYCEROL_AND_KETONE_BODY_METABOLISM	KEGG_VALINE_LEUCINE_AND_ISOLEUCINE_DEGRADATION	KEGG_SNARE_INTERACTIONS_IN_VESICULAR_TRANSPORT	KEGG_OLFACTORY_TRANSDUCTION	REACTOME_POTASSIUM_CHANNELS
	BIOCARTA_P53_PATHWAY	BIOCARTA_EGF_PATHWAY	KEGG_RNA_POLYMERASE	KEGG_DNA_REPLICATION	KEGG_RNA_DEGRADATION	KEGG_CITRATE_CYCLE_TCA_CYCLE	REACTOME_AMINE_LIGAND_BINDING_RECEPTORS	KEGG_CYTOSOLIC_DNA_SENSING_PATHWAY	BIOCARTA_MITOCHONDRIA_PATHWAY	PID_TRAIL_PATHWAY	KEGG_AUTOIMMUNE_THYROID_DISEASE	KEGG_ARACHIDONIC_ACID_METABOLISM	REACTOME_CYTOSOLIC_TRNA_AMINOACYLATION	REACTOME_DEGRADATION_OF_THE_EXTRACELLULAR_MATRIX	KEGG_PROGESTERONE_MEDIATED_OOCYTE_MATURATION	REACTOME_PEPTIDE_LIGAND_BINDING_RECEPTORS	REACTOME_DEFENSINS	NABA_PROTEOGLYCANS	REACTOME_PHASE1_FUNCTIONALIZATION_OF_COMPOUNDS	PID_THROMBIN_PAR1_PATHWAY	REACTOME_FATTY_ACYL_COA_BIOSYNTHESIS	REACTOME_BRANCHED_CHAIN_AMINO_ACID_CATABOLISM	REACTOME_PROTEOLYTIC_CLEAVAGE_OF_SNARE_COMPLEX_PROTEINS	REACTOME_OLFACTORY_SIGNALING_PATHWAY	REACTOME_VOLTAGE_GATED_POTASSIUM_CHANNELS
	KEGG_CELL_CYCLE	BIOCARTA_ERK_PATHWAY	KEGG_SPLICEOSOME	KEGG_MISMATCH_REPAIR	REACTOME_3_UTR_MEDIATED_TRANSLATIONAL_REGULATION	KEGG_HUNTINGTONS_DISEASE	REACTOME_CLASS_A1_RHODOPSIN_LIKE_RECEPTORS	NABA_SECRETED_FACTORS	REACTOME_INTRINSIC_PATHWAY_FOR_APOPTOSIS	ST_FAS_SIGNALING_PATHWAY	KEGG_INTESTINAL_IMMUNE_NETWORK_FOR_IGA_PRODUCTION	KEGG_LINOLEIC_ACID_METABOLISM	REACTOME_TRNA_AMINOACYLATION	REACTOME_EXTRACELLULAR_MATRIX_ORGANIZATION
	KEGG_UBIQUITIN_MEDIATED_PROTEOLYSIS	BIOCARTA_FCER1_PATHWAY	REACTOME_ABORTIVE_ELONGATION_OF_HIV1_TRANSCRIPT_IN_THE_ABSENCE_OF_TAT	KEGG_NUCLEOTIDE_EXCISION_REPAIR	REACTOME_ACTIVATION_OF_CHAPERONE_GENES_BY_XBP1S	KEGG_OXIDATIVE_PHOSPHORYLATION	REACTOME_GPCR_LIGAND_BINDING	REACTOME_CHEMOKINE_RECEPTORS_BIND_CHEMOKINES
	PID_ATR_PATHWAY	BIOCARTA_GLEEVEC_PATHWAY	REACTOME_CLEAVAGE_OF_GROWING_TRANSCRIPT_IN_THE_TERMINATION_REGION_	PID_FANCONI_PATHWAY	REACTOME_ACTIVATION_OF_THE_MRNA_UPON_BINDING_OF_THE_CAP_BINDING_COMPLEX_AND_EIFS_AND_SUBSEQUENT_BINDING_TO_43S	KEGG_PARKINSONS_DISEASE	REACTOME_G_ALPHA_Q_SIGNALLING_EVENTS	REACTOME_REGULATION_OF_IFNA_SIGNALING
	PID_E2F_PATHWAY	BIOCARTA_GPCR_PATHWAY	REACTOME_ELONGATION_ARREST_AND_RECOVERY	REACTOME_BASE_EXCISION_REPAIR	REACTOME_DEADENYLATION_DEPENDENT_MRNA_DECAY	REACTOME_CITRIC_ACID_CYCLE_TCA_CYCLE	REACTOME_G_ALPHA_S_SIGNALLING_EVENTS
	PID_FOXM1_PATHWAY	BIOCARTA_IGF1R_PATHWAY	REACTOME_FORMATION_OF_RNA_POL_II_ELONGATION_COMPLEX_	REACTOME_CHROMOSOME_MAINTENANCE	REACTOME_DESTABILIZATION_OF_MRNA_BY_KSRP	REACTOME_PYRUVATE_METABOLISM_AND_CITRIC_ACID_TCA_CYCLE	REACTOME_NUCLEOTIDE_LIKE_PURINERGIC_RECEPTORS
	REACTOME_ACTIVATION_OF_ATR_IN_RESPONSE_TO_REPLICATION_STRESS	BIOCARTA_PYK2_PATHWAY	REACTOME_FORMATION_OF_THE_HIV1_EARLY_ELONGATION_COMPLEX	REACTOME_DNA_REPAIR	REACTOME_FORMATION_OF_THE_TERNARY_COMPLEX_AND_SUBSEQUENTLY_THE_43S_COMPLEX	REACTOME_RESPIRATORY_ELECTRON_TRANSPORT
	REACTOME_ACTIVATION_OF_THE_PRE_REPLICATIVE_COMPLEX	BIOCARTA_RACCYCD_PATHWAY	REACTOME_FORMATION_OF_TRANSCRIPTION_COUPLED_NER_TC_NER_REPAIR_COMPLEX	REACTOME_DOUBLE_STRAND_BREAK_REPAIR	REACTOME_INFLUENZA_LIFE_CYCLE	REACTOME_RESPIRATORY_ELECTRON_TRANSPORT_ATP_SYNTHESIS_BY_CHEMIOSMOTIC_COUPLING_AND_HEAT_PRODUCTION_BY_UNCOUPLING_PROTEINS_
	REACTOME_APC_CDC20_MEDIATED_DEGRADATION_OF_NEK2A	BIOCARTA_RAS_PATHWAY	REACTOME_HIV_INFECTION	REACTOME_EXTENSION_OF_TELOMERES	REACTOME_INFLUENZA_VIRAL_RNA_TRANSCRIPTION_AND_REPLICATION	REACTOME_TCA_CYCLE_AND_RESPIRATORY_ELECTRON_TRANSPORT
	REACTOME_APC_C_CDC20_MEDIATED_DEGRADATION_OF_MITOTIC_PROTEINS	KEGG_ACUTE_MYELOID_LEUKEMIA	REACTOME_HIV_LIFE_CYCLE	REACTOME_FORMATION_OF_INCISION_COMPLEX_IN_GG_NER	REACTOME_METABOLISM_OF_MRNA
	REACTOME_APC_C_CDH1_MEDIATED_DEGRADATION_OF_CDC20_AND_OTHER_APC_C_CDH1_TARGETED_PROTEINS_IN_LATE_MITOSIS_EARLY_G1	KEGG_COLORECTAL_CANCER	REACTOME_LATE_PHASE_OF_HIV_LIFE_CYCLE	REACTOME_GLOBAL_GENOMIC_NER_GG_NER	REACTOME_METABOLISM_OF_PROTEINS
	REACTOME_APOPTOSIS	KEGG_ENDOCYTOSIS	REACTOME_METABOLISM_OF_NON_CODING_RNA	REACTOME_HOMOLOGOUS_RECOMBINATION_REPAIR_OF_REPLICATION_INDEPENDENT_DOUBLE_STRAND_BREAKS	REACTOME_METABOLISM_OF_RNA
	REACTOME_ASSEMBLY_OF_THE_PRE_REPLICATIVE_COMPLEX	KEGG_ERBB_SIGNALING_PATHWAY	REACTOME_MRNA_3_END_PROCESSING	REACTOME_LAGGING_STRAND_SYNTHESIS	REACTOME_MITOCHONDRIAL_PROTEIN_IMPORT
	REACTOME_AUTODEGRADATION_OF_CDH1_BY_CDH1_APC_C	KEGG_GLIOMA	REACTOME_MRNA_CAPPING	REACTOME_MEIOSIS	REACTOME_NONSENSE_MEDIATED_DECAY_ENHANCED_BY_THE_EXON_JUNCTION_COMPLEX
	REACTOME_CDT1_ASSOCIATION_WITH_THE_CDC6_ORC_ORIGIN_COMPLEX	PID_ERBB1_DOWNSTREAM_PATHWAY	REACTOME_MRNA_PROCESSING	REACTOME_MEIOTIC_RECOMBINATION	REACTOME_PEPTIDE_CHAIN_ELONGATION
	REACTOME_CELL_CYCLE	PID_ERBB2_ERBB3_PATHWAY	REACTOME_MRNA_SPLICING	REACTOME_NUCLEOTIDE_EXCISION_REPAIR	REACTOME_PERK_REGULATED_GENE_EXPRESSION
	REACTOME_CELL_CYCLE_CHECKPOINTS	PID_IGF1_PATHWAY	REACTOME_MRNA_SPLICING_MINOR_PATHWAY	REACTOME_PROCESSIVE_SYNTHESIS_ON_THE_LAGGING_STRAND	REACTOME_SRP_DEPENDENT_COTRANSLATIONAL_PROTEIN_TARGETING_TO_MEMBRANE
	REACTOME_CELL_CYCLE_MITOTIC	PID_MET_PATHWAY	REACTOME_PROCESSING_OF_CAPPED_INTRONLESS_PRE_MRNA	REACTOME_RESOLUTION_OF_AP_SITES_VIA_THE_MULTIPLE_NUCLEOTIDE_PATCH_REPLACEMENT_PATHWAY	REACTOME_TRANSLATION
	REACTOME_CLASS_I_MHC_MEDIATED_ANTIGEN_PROCESSING_PRESENTATION	PID_NEPHRIN_NEPH1_PATHWAY	REACTOME_PROCESSING_OF_CAPPED_INTRON_CONTAINING_PRE_MRNA	REACTOME_RNA_POL_I_TRANSCRIPTION	REACTOME_UNFOLDED_PROTEIN_RESPONSE
	REACTOME_CYCLIN_E_ASSOCIATED_EVENTS_DURING_G1_S_TRANSITION_	PID_PI3KCI_AKT_PATHWAY	REACTOME_RNA_POL_II_PRE_TRANSCRIPTION_EVENTS	REACTOME_TELOMERE_MAINTENANCE
	REACTOME_DNA_REPLICATION	PID_PI3K_PLC_TRK_PATHWAY	REACTOME_RNA_POL_II_TRANSCRIPTION
	REACTOME_DNA_STRAND_ELONGATION	REACTOME_DARPP_32_EVENTS	REACTOME_RNA_POL_II_TRANSCRIPTION_PRE_INITIATION_AND_PROMOTER_OPENING
	REACTOME_E2F_MEDIATED_REGULATION_OF_DNA_REPLICATION	REACTOME_DOWNSTREAM_SIGNAL_TRANSDUCTION	REACTOME_RNA_POL_I_RNA_POL_III_AND_MITOCHONDRIAL_TRANSCRIPTION
	REACTOME_ER_PHAGOSOME_PATHWAY	REACTOME_EGFR_DOWNREGULATION	REACTOME_RNA_POL_I_TRANSCRIPTION_INITIATION
	REACTOME_G1_S_SPECIFIC_TRANSCRIPTION	REACTOME_GAB1_SIGNALOSOME	REACTOME_TRANSCRIPTION
	REACTOME_G1_S_TRANSITION	REACTOME_NGF_SIGNALLING_VIA_TRKA_FROM_THE_PLASMA_MEMBRANE	REACTOME_TRANSCRIPTION_COUPLED_NER_TC_NER
	REACTOME_G2_M_CHECKPOINTS	REACTOME_PI3K_AKT_ACTIVATION
	REACTOME_INHIBITION_OF_THE_PROTEOLYTIC_ACTIVITY_OF_APC_C_REQUIRED_FOR_THE_ONSET_OF_ANAPHASE_BY_MITOTIC_SPINDLE_CHECKPOINT_COMPONENTS	REACTOME_PIP3_ACTIVATES_AKT_SIGNALING
	REACTOME_MITOTIC_G1_G1_S_PHASES	REACTOME_RECYCLING_PATHWAY_OF_L1
	REACTOME_MITOTIC_M_M_G1_PHASES	REACTOME_SIGNALING_BY_EGFR_IN_CANCER
	REACTOME_MITOTIC_PROMETAPHASE	REACTOME_SIGNALING_BY_ERBB2
	REACTOME_M_G1_TRANSITION	REACTOME_SIGNALING_BY_FGFR
	REACTOME_ORC1_REMOVAL_FROM_CHROMATIN	REACTOME_SIGNALING_BY_FGFR_IN_DISEASE
	REACTOME_P53_DEPENDENT_G1_DNA_DAMAGE_RESPONSE	REACTOME_SIGNALLING_BY_NGF
	REACTOME_P53_INDEPENDENT_G1_S_DNA_DAMAGE_CHECKPOINT
	REACTOME_REGULATION_OF_MITOTIC_CELL_CYCLE
	REACTOME_REGULATION_OF_MRNA_STABILITY_BY_PROTEINS_THAT_BIND_AU_RICH_ELEMENTS
	REACTOME_SCFSKP2_MEDIATED_DEGRADATION_OF_P27_P21
	REACTOME_SYNTHESIS_OF_DNA
	REACTOME_S_PHASE
	REACTOME_VIF_MEDIATED_DEGRADATION_OF_APOBEC3G

## Sheet: Summary
Canonical Pathway Category	Module Number
Apoptosis	8	9	19
Immune processes, diseases, defensins	10	7	16
Catabolism	21
Cell cycle	3	14
Cell cycle, apoptosis	0
Cell cycle, proteins, Influenza life cycle	4
Complex proteins, transport	22
Cytochrome P450	18
Diseases	5
ECM	13	17
Metabolism, biosynthesis	11	12	20
Neuroactive ligand-receptor interaction	6	23
Oncogenic	1
Potassium channels	24
Signaling events	15
Transcription, HIV life cycle	2

## Sheet: Manuscript and Author Info
Transcriptomic and functional analyses of 3D placental extravillous trophoblast spheroids
Supplementary Table S3
Michael K. Wong1, Mishquatul Wahed2, Sarah A. Shawky2, Anna Dvorkin-Gheva3, Sandeep Raha1,2*
1Graduate Program in Medical Sciences, McMaster University, Hamilton, Ontario, Canada, L8N 3Z5.
2Department of Pediatrics, McMaster University, Hamilton, Ontario, Canada, L8N 3Z5.
3McMaster Immunology Research Centre, McMaster University, Hamilton, ON, Canada, L8N 3Z5.
* Corresponding author email: rahas@mcmaster.ca
