# Supplementary material for: Transcriptomic and functional analyses of 3D placental extravillous trophoblast spheroids
Source: Sci Rep. 2019 Aug 30;9:12607. doi: 10.1038/s41598-019-48816-8 (PMC6717201; doi:10.1038/s41598-019-48816-8)
Supplement: Supplementary file 4 — Supplementary Table S9 [file 41598_2019_48816_MOESM4_ESM.xlsx]

## Sheet: Up-Regulated Process Terms
GO-ID	Biological Process Term	FDR p-value	Genes in test set
7608	sensory perception of smell	2.9659e-65	OR7G1|OR9K2|OR11H1|OR2M7|OR51D1|OR5K1|OR52N1|OR2M5|OR2M2|OR1K1|OR4Q3|OR2T12|OR52N4|OR2T10|OR52N2|OR5D18|OR5H14|OR1S2|OR1S1|OR10W1|OR11H6|OR2A42|OR5D16|OR5D14|OR8H3|OR1B1|OR2D2|OR14C36|OR52E4|OR5AS1|OR2L5|OR11G2|OR2L3|OR2L2|OR1J1|OR2T6|OR5R1|OR52M1|OR2T5|OR2T2|OMP|OR2T1|OR4X2|OR4X1|OR51T1|OR4C12|OR5A2|OR4C16|OR6C3|OR5A1|OR4C15|OR6C1|OR9I1|OR2C1|OR5I1|OR6K2|OR52D1|OR9Q2|OR1I1|OR5M10|OR51B6|OR51B4|O…
7606	sensory perception of chemical stimulus	1.3581e-63	OR7G1|OR9K2|OR11H1|OR2M7|OR51D1|OR5K1|OR52N1|OR2M5|OR2M2|OR1K1|OR4Q3|OR2T12|OR52N4|OR2T10|OR52N2|OR5D18|OR5H14|OR1S2|OR1S1|OR10W1|OR11H6|OR2A42|OR5D16|OR5D14|OR8H3|OR1B1|OR2D2|OR14C36|OR52E4|OR5AS1|OR2L5|OR11G2|OR2L3|OR2L2|OR1J1|OR2T6|OR5R1|OR52M1|OR2T5|SCNN1G|OR2T2|OMP|OR2T1|OR4X2|OR4X1|SCNN1B|OR51T1|OR4C12|OR5A2|OR4C16|OR6C3|OR5A1|OR4C15|OR6C1|OR9I1|OR2C1|TAS2R41|OR5I1|OR6K2|OR52D1|C5AR1|OR9Q2|…
7600	sensory perception	4.1022e-48	OR7G1|OR9K2|OR11H1|OR2M7|OR52N1|OR2M5|OR2M2|OR1K1|OR4Q3|OR52N4|OR52N2|OR5D18|OR10W1|OR11H6|PROK2|OR2A42|OR5D16|OR5D14|OR8H3|OR2L5|OR11G2|OR2L3|OR2L2|OR1J1|OR5R1|OR52M1|OMP|RBP3|KCNQ1|OR4C12|OR5A2|OR4C16|OR6C3|OR5A1|OR4C15|OR6C1|OR9I1|TAS2R41|EPAS1|OR1I1|OR5M10|GJC3|RDH10|OTOF|OR7D4|PROM1|OR6B2|OR7D2|TAS2R31|OR4N5|OR4N4|OR2J2|OR2J1|OR10S1|OR4N2|OR5P3|TAS2R38|OR52K1|OCLM|STRC|PNOC|OR4D10|OR10C1|OR2…
50877	neurological system process	5.6225e-47	OR7G1|OR9K2|OR11H1|OR2M7|OR52N1|OR2M5|OR2M2|OR1K1|OR4Q3|GRPR|OR52N4|CLDN1|OR52N2|OR5D18|OR10W1|OR11H6|PROK2|OR2A42|BSN|OR5D16|OR5D14|OR8H3|SDS|OR2L5|OR11G2|TAAR5|OR2L3|OR2L2|OR1J1|OR5R1|OR52M1|OMP|RBP3|KCNQ1|KCNQ2|OR4C12|KCNQ5|OR5A2|OR4C16|OR6C3|OR5A1|OR4C15|OR6C1|OR9I1|TAS2R41|EPAS1|PDE1B|OR1I1|KLK6|OR5M10|GJC3|GALR3|NPBWR1|RDH10|KCNMB1|KCNN1|OTOF|OR7D4|PROM1|OR6B2|OR7D2|NTSR1|EGR3|TAS2R31|OR4N5…
50890	cognition	3.5417e-46	OR7G1|OR9K2|OR11H1|OR2M7|OR52N1|OR2M5|OR2M2|OR1K1|OR4Q3|GRPR|OR52N4|OR52N2|OR5D18|OR10W1|OR11H6|PROK2|OR2A42|OR5D16|OR5D14|OR8H3|SDS|OR2L5|OR11G2|OR2L3|OR2L2|OR1J1|OR5R1|OR52M1|OMP|RBP3|KCNQ1|OR4C12|OR5A2|OR4C16|OR6C3|OR5A1|OR4C15|OR6C1|OR9I1|TAS2R41|EPAS1|PDE1B|OR1I1|OR5M10|GJC3|GALR3|RDH10|OTOF|OR7D4|PROM1|OR6B2|OR7D2|TAS2R31|OR4N5|OR4N4|OR2J2|OR2J1|OR10S1|OR4N2|OR5P3|TAS2R38|OR52K1|FOSL1|OCLM|…
3008	system process	9.6268e-46	OR7G1|OR9K2|OR11H1|OR2M7|OR52N1|OR2M5|AQP7|AQP5|OR2M2|OR1K1|OR4Q3|GRPR|AQP2|OR52N4|CLDN1|OR52N2|GJA1|OR5D18|OR10W1|OR11H6|PROK2|OR2A42|BSN|OR5D16|OR5D14|OR8H3|SDS|OR2L5|OR11G2|TAAR5|OR2L3|OR2L2|OR1J1|OR5R1|OR52M1|MYL6|OMP|MYL7|RBP3|KCNQ1|KCNQ2|AGTR1|OR4C12|KCNQ5|OR5A2|OR4C16|OR6C3|OR5A1|MYL9|OR4C15|OR6C1|OR9I1|TAS2R41|EPAS1|EPB41|PDE1B|CLCNKB|OR1I1|KLK6|OR5M10|GJC3|GALR3|NPBWR1|RDH10|KCNMB1|KCNN1…
50896	response to stimulus	7.4978e-40	HCP5|MAPKBP1|TFRC|OR11H1|OR2M7|SERPINE1|OR2M5|XYLT1|SMC6|FZD10|OR2M2|OR1K1|OR4Q3|GRPR|GJA1|VPREB1|OR11H6|PROK2|CMKLR1|DAXX|SDS|GML|OR2L5|OR11G2|RNASE6|OR2L3|OR2L2|OR1J1|RNASE3|RNASE2|OR5R1|CLPS|RBP3|AGTR1|TXNIP|FPR1|OR1I1|GATA3|PLA2G5|FPR2|LY9|HIF1A|C3|OR5M10|LDHA|ADAMTS13|GALR3|KCNMB1|PROM1|HLA-DQA2|HLA-DQA1|OR4N5|OR4N4|OR2J2|OR2J1|OR4N2|OR5P3|GP5|SOX30|TREML1|FOSL1|IL22RA1|GPR182|SNAI2|OR10C1|H…
32501	multicellular organismal process	1.7359e-34	ROPN1B|PRSS1|EHF|SERPINE2|MYT1L|OR11H1|OR2M7|SERPINE1|OR2M5|XYLT1|FZD10|OR2M2|OR1K1|OR4Q3|GRPR|CLDN1|GLDN|LCE1B|GJA1|ZMIZ1|OR11H6|PROK2|PRSS3|PRSS2|CMKLR1|MEF2A|SDS|ZNF160|OR2L5|OR11G2|TAAR5|OR2L3|OR2L2|OR1J1|HSPG2|OR5R1|LCE2B|LCE2C|MYL6|MYL7|CLPS|LCE2A|RBP3|AGTR1|TXNIP|HOXB3|MYL9|CRABP1|CLCNKB|OR1I1|EDDM3B|HIF1A|OR5M10|GJC3|ADAMTS13|GALR3|NPBWR1|RDH10|KCNMB1|GALR1|ALX3|PROM1|HOXC9|TIPARP|OR4N5|O…
6952	defense response	2.1081e-13	HCP5|FCMR|FCN3|CD84|TFRC|CLEC4M|SERPINE1|CLEC5A|ADORA1|PROK2|IFNA13|IFNA14|IFNA16|IGFBP4|IFNA17|WNT5A|RNASE6|RNASE3|DEFB110|CLEC4A|TYROBP|MAL|PTPRCAP|CD300C|PFN1|SCG2|S100A8|IFNA10|REG3A|CCL3L3|C5AR1|GATA3|REG3G|FPR2|MST1R|HIF1A|C3|CLEC7A|UBD|GAGE2D|SLAMF7|DRD1|IFNA21|XCR1|DEFB104A|CYP4F11|SELE|TREML1|FOSL1|CXCL10|IL6|VNN1|CD209|IL9|HAMP|ITGB1|IFNA7|CXCL9|CXCL8|TNFAIP6|IL27|CXCL1|C8B|CXCL3|IFNA8|…
7626	locomotory behavior	1.7287e-10	NRP2|CXCL9|ITGAM|CXCL8|LECT2|CXCL17|CXCL1|CXCL3|CXCL2|SLC6A3|CX3CL1|CXCL5|SPN|PLAU|CCRL2|ENPP2|PROK2|CCR7|LBP|FEZF2|CCR5|CMKLR1|CCR2|EPHA4|CHRNB4|SDS|BSX|OPRM1|RNASE2|IL1B|KCNMA1|AGTR1|DEFB4A|SCG2|S100A8|CCL13|CALCA|PDE1B|CCL3L3|CHAT|C5AR1|FPR1|CACNA1A|FPR2|TNFRSF11A|NPAS2|CLN6|GNG7|CCL5|CCL3|SLIT2|DRD1|CCL18|NTSR1|CMTM8|OR1D2|XCR1|CCL20|LGI4|CMTM5|SOD2|VEGFA|HIPK2|FOSL1|NR4A2|CXCL10|IL6|CXCL12|M…
7186	G-protein coupled receptor protein signaling pathway	8.8275e-10	CHRM3|CHRM1|GPR65|GRPR|RGS1|CCRL2|ADORA1|ENPP2|PROK2|OXER1|CMKLR1|PTGDR|GHSR|TAAR8|TAAR5|GPR75|TAAR1|MTNR1A|MTNR1B|AGTR1|APLNR|CALCA|LPAR1|FPR1|CACNA1A|FPR2|MCHR1|CRHR1|C3|GRK5|GALR3|HRH2|NPBWR1|GALR1|TAC4|DRD1|NTSR1|XCR1|GPR15|GPR12|GNG11|IL2|CXCL12|PNOC|NMUR2|GABRB2|CXCL9|GPR26|CXCL8|HTR2B|CXCL1|CD3E|ADRA1A|LTB4R|GABRR1|BDKRB1|TAS2R1|GPR139|CCR5|GPR39|AVPR1B|GPR35|GPR32|AVPR2|GLP2R|GPR31|OPRM1|…
42330	taxis	3.7111e-09	NRP2|CXCL9|ITGAM|CXCL8|LECT2|CXCL17|CXCL1|CXCL3|CXCL2|CX3CL1|CXCL5|SPN|PLAU|CCRL2|ENPP2|PROK2|CCR7|LBP|CCR5|CMKLR1|CCR2|SDS|RNASE2|IL1B|AGTR1|DEFB4A|SCG2|S100A8|CCL13|CALCA|CCL3L3|C5AR1|FPR1|FPR2|TNFRSF11A|CCL5|CCL3|SLIT2|CCL18|CMTM8|OR1D2|XCR1|CCL20|CMTM5|VEGFA|FOSL1|CXCL10|IL6|CXCL12
6935	chemotaxis	3.7111e-09	NRP2|CXCL9|ITGAM|CXCL8|LECT2|CXCL17|CXCL1|CXCL3|CXCL2|CX3CL1|CXCL5|SPN|PLAU|CCRL2|ENPP2|PROK2|CCR7|LBP|CCR5|CMKLR1|CCR2|SDS|RNASE2|IL1B|AGTR1|DEFB4A|SCG2|S100A8|CCL13|CALCA|CCL3L3|C5AR1|FPR1|FPR2|TNFRSF11A|CCL5|CCL3|SLIT2|CCL18|CMTM8|OR1D2|XCR1|CCL20|CMTM5|VEGFA|FOSL1|CXCL10|IL6|CXCL12
40011	locomotion	8.6823e-09	ITGB1|ROPN1B|NRP1|NRP2|CXCL9|ITGAM|BTG1|CXCL8|CLEC4M|LECT2|HTR2B|CXCL17|CXCL1|PTPRK|CXCL3|ETS1|CXCL2|CX3CL1|CXCL5|SPN|GJA1|PLAU|CFL1|DNER|CCRL2|ENPP2|TEKT2|PROK2|CCR7|LBP|PRSS3|CCR5|CD34|CMKLR1|CCR2|SDS|NAV1|RNASE2|SCNN1G|CEACAM1|IL1B|SCNN1B|PPAP2B|AGTR1|CDH13|DEFB4A|SCG2|GAS8|S100A8|CD44|CCL13|CALCA|SEMA3C|SRF|DNAH5|CCL3L3|C5AR1|ATP1A4|FPR1|FPR2|TNFRSF11A|ASCL1|AKAP4|CLN6|FUT8|CCL5|CCL3|SLIT2|DR…
32101	regulation of response to external stimulus	4.3636e-08	CXCL8|SERPINE2|SERPINE1|XYLT1|SLC6A3|CX3CL1|SPN|PLAU|ADORA1|LBP|GHSR|GPX2|ITGA2|WNT5A|GP1BA|OPRM1|TNFRSF1B|TNFRSF1A|GREM1|NPC1|IL1B|AGTR1|CDH13|IL6ST|TLR4|SCG2|SERPINC1|C5AR1|CXCR4|TNFRSF11A|PTGS2|RTN4|C3|NT5E|CNR1|CCL5|SLIT2|DRD1|CD276|CMA1|PLA2G2A|VEGFC|SELE|IL2|AGT|VEGFA|CXCL10|IL6|CXCL12|PROC|F2RL1
9611	response to wounding	8.9562e-08	FCN3|TFRC|SERPINE1|GJA1|CDH3|PLAU|ADORA1|PROK2|IGFBP4|WNT5A|TM4SF4|SCNN1G|LOX|NINJ2|SCNN1B|MAL|SCG2|S100A8|REG3A|CCL3L3|REG3G|FPR2|HOXB13|HIF1A|KLK6|C3|ADAMTS13|CLEC7A|XCR1|FOXF1|TFPI2|CYP4F11|GP5|POU2F3|SELE|TREML1|IL22RA1|CXCL10|IL6|VNN1|IL9|ID3|ACHE|NRP1|CXCL9|CXCL8|TNFAIP6|IL27|CXCL1|C8B|CXCL3|ORM2|CXCL2|LTB4R|CX3CL1|MMP20|NFKBIZ|BDKRB1|CCR7|ITGB6|LBP|CCR5|MBL2|CCR2|SERPINB2|MME|ITGA2|IFNGR2|…
7166	cell surface receptor linked signaling pathway	1.392e-07	EPHB6|CBLB|FZD10|GRPR|PROK2|OXER1|CMKLR1|PTGDR|EPHA4|TAAR8|TAAR5|TAAR1|SFRP1|AGTR1|TXNIP|CD101|LPAR1|FPR1|STC1|FPR2|MST1R|CRHR1|C3|CD79A|ADAMTS13|GALR3|NPBWR1|GALR1|NTSR1|XCR1|GPR15|GPR12|TIPARP|FOXF1|LIF|GNG11|PTK2|GDF7|COL1A2|GPR182|PNOC|GABRB2|GPR26|PRL|PTPRK|CD3E|CD3D|CX3CL1|GABRR1|HEY1|DNER|GPR139|CCR5|CCR2|GPR39|AVPR1B|GPR35|FSHB|GPR32|IFNGR2|WNT9B|GPR31|GP1BA|ITPKB|IL1A|MC3R|CEACAM1|OPN1MW…
7610	behavior	1.8858e-07	NRP2|CXCL9|ITGAM|CXCL8|CTNND2|LECT2|CXCL17|CXCL1|GRPR|COMT|CXCL3|CXCL2|SLC6A3|CX3CL1|CXCL5|SPN|PLAU|OBP2B|CCRL2|ENPP2|CASP1|PROK2|CCR7|TAS2R1|LBP|FEZF2|CCR5|CMKLR1|CCR2|EPHA4|GHSR|CHRNB4|SDS|BSX|OPRM1|CYP7B1|RNASE2|MTNR1A|IL1B|KCNMA1|AGTR1|DEFB4A|PLCB1|SCG2|S100A8|CCL13|CALCA|PDE1B|NPY4R|CCL3L3|CHAT|ASIP|C5AR1|FPR1|CACNA1A|FPR2|TNFRSF11A|PTGS2|MCHR1|NPAS2|CLN6|GALR3|CNR1|GNG7|CCL5|CCL3|SLIT2|DRD1…
32103	positive regulation of response to external stimulus	3.1727e-07	CXCL8|SERPINE1|C5AR1|TNFRSF11A|PTGS2|CX3CL1|C3|CNR1|CCL5|SLIT2|LBP|GHSR|ITGA2|WNT5A|PLA2G2A|VEGFC|OPRM1|AGT|TNFRSF1A|VEGFA|CXCL10|IL6|CXCL12|IL1B|AGTR1|F2RL1|CDH13|IL6ST|TLR4|SCG2
9617	response to bacterium	3.1788e-07	SERPINE1|AQP2|COMT|SPN|CASP1|BDKRB1|LBP|MBL2|DEFB106B|GPX2|WNT5A|DIO2|RNASE3|OPRM1|DEFB110|DEFB106A|DCN|HIST2H2BE|TNFRSF1A|CHIT1|IL1A|HCK|IL1B|IRF8|TRIB1|DEFB4A|TLR4|DEFB129|HIST1H2BK|C5AR1|DEFB125|DEFB124|DEFB123|TNFRSF11A|CD1D|PTGS2|DEFB107A|DEFB107B|THPO|CNR1|CCL5|RNASE7|DEFB104A|CCL20|PLA2G2A|FMO1|DEFB133|DEFB108B|DEFB132|SELE|ASS1|NFKBIA|CXCL10|IL6|TG|HAMP
51707	response to other organism	1.2378e-06	IFNA7|SERPINE1|AQP2|COMT|IFNA8|SPN|CFL1|CASP1|BDKRB1|LBP|TRIM22|MBL2|IFNA13|DEFB106B|GPX2|IFNA14|IFNA16|GPX3|IFNA17|IFNGR2|WNT5A|DIO2|RNASE3|OPRM1|DEFB110|DEFB106A|DCN|HIST2H2BE|TNFRSF1A|CHIT1|IL1A|HCK|IL1B|IRF8|TRIB1|DEFB4A|TLR4|IFNA10|DEFB129|ODC1|HIST1H2BK|C5AR1|DEFB125|DEFB124|CXCR4|DEFB123|TNFRSF11A|CD1D|MST1R|PTGS2|DEFB107A|DEFB107B|THPO|CNR1|CLEC7A|CCL5|RNASE7|IFNA21|DEFB104A|CCL20|PLA2G2A…
9605	response to external stimulus	2.5213e-06	TFRC|CXCL17|FZD10|AQP2|FADS6|PLAU|CCRL2|ENPP2|PROK2|CMKLR1|SLC34A3|GHSR|SDS|WNT5B|WNT5A|RNASE2|CLPS|AGTR1|TXNIP|IL6ST|SCG2|S100A8|CALCA|CCL3L3|C5AR1|FPR1|CACNA1A|STC1|TNFRSF11B|FPR2|TNFRSF11A|CD1D|RASGRP4|LDHA|CLEC7A|IGFBP7|DRD1|WNT3|XCR1|FOXF1|SLC10A3|FOSL1|NR4A2|CXCL10|IL6|CXCL12|BHLHE40|NRP2|CXCL9|ITGAM|CXCL8|LECT2|CXCL1|CXCL3|CXCL2|SLC6A3|CX3CL1|CXCL5|SPN|KYNU|CCR7|LBP|CCR5|CCR2|ITGA2|WNT9B|O…
50727	regulation of inflammatory response	1.1866e-05	SERPINC1|SERPINE1|TNFRSF11A|PTGS2|CX3CL1|SPN|C3|NT5E|CNR1|CCL5|ADORA1|LBP|CD276|GHSR|GPX2|CMA1|ITGA2|PLA2G2A|TNFRSF1B|SELE|IL2|AGT|TNFRSF1A|IL6|IL1B|AGTR1|IL6ST|TLR4
51704	multi-organism process	2.8646e-05	TFRC|CLEC4M|CD80|SERPINE1|GRPR|AQP2|COMT|CLDN1|PLAU|ANPEP|CFL1|TRIM22|MAP3K5|KPNA1|GHSR|IFNA13|DAXX|IFNA14|IFNA16|IL11RA|IFNA17|WNT5A|DIO2|KRT7|RNASE3|DEFB110|CHIT1|MTNR1A|PAPPA|PSG7|NUP98|TRIB1|SCG2|IFNA10|CALCA|CSH2|CSH1|C5AR1|TNFRSF11A|CD1D|MST1R|CRHR1|THPO|CLEC7A|TNFRSF14|IGFBP7|DRD1|PI3|IFNA21|DEFB104A|AMBP|LIF|POU2F3|SELE|FOSL1|NFKBIA|CXCL10|IL6|CXCL12|TG|CD209|HAMP|ITGB1|IFNA7|PZP|PRL|IFNA…
50729	positive regulation of inflammatory response	4.2352e-05	ITGA2|PLA2G2A|SERPINE1|TNFRSF11A|PTGS2|AGT|CX3CL1|TNFRSF1A|C3|IL6|CNR1|IL1B|CCL5|AGTR1|LBP|IL6ST|TLR4
6954	inflammatory response	4.2378e-05	FCN3|CXCL9|CXCL8|TFRC|TNFAIP6|IL27|CXCL1|C8B|CXCL3|ORM2|CXCL2|LTB4R|MMP20|NFKBIZ|ADORA1|PROK2|BDKRB1|CCR7|ITGB6|LBP|CCR5|MBL2|CCR2|IGFBP4|OPRM1|TNFRSF1A|IL1A|IL1B|MAL|MS4A2|CD46|MS4A1|TLR4|SCG2|S100A8|CD44|HDAC4|C1QB|APCS|REG3A|CCL13|CCL3L3|CXCR4|REG3G|FPR2|HIF1A|C3|CLEC7A|CCL5|CCL3|CCL18|PLA2G2D|XCR1|CCL20|CYP4F11|SELE|ASS1|CXCL10|IL6|VNN1|IL9|CFHR5|C1QC
2376	immune system process	4.7932e-05	FCN3|CLEC4M|GPR65|CD80|CBLB|ETS1|PREX1|VPREB1|CYSLTR2|RGS1|ARHGDIB|ENPP2|TRIM22|CMKLR1|KIRREL3|SDS|ZNF160|WNT5A|ZBTB32|RUNX1|CLEC4A|CHIT1|MAL|HOXB3|SCG2|SKAP2|CALCA|EPAS1|CCL3L3|C5AR1|TNFRSF11A|CD1D|CD1C|LY9|NDRG1|CRHR1|RASGRP4|C3|CD79A|THPO|HRH2|CLEC7A|UBD|SLAMF7|TNFRSF14|HLA-DQA2|HLA-DQA1|CD276|TIPARP|LIF|PRG4|SELE|PBX1|IL2|TREML1|NFKBIA|CXCL10|IL3|IL6|VNN1|CXCL12|SP2|CD209|ID2|TREML2|IL9|RAET1…
6950	response to stress	6.0523e-05	HCP5|MAPKBP1|ERRFI1|TFRC|SLC23A1|SERPINE1|XYLT1|SMC6|AQP2|GJA1|LONP1|PROK2|TP63|DAXX|SLC6A18|GML|RNASE6|RNASE3|TM4SF4|RBP3|NINJ2|TXNIP|TRIB1|PFN1|EPAS1|GATA3|FPR2|MST1R|HIF1A|KLK6|C3|ADAMTS13|SLAMF7|XCR1|DEFB104A|FOXF1|ST8SIA1|CIDEA|GP5|TREML1|FOSL1|IL22RA1|VNN1|CD209|GPR182|ID3|HYOU1|HAMP|RYR1|ACHE|NRP1|SMG1|IFNA7|BTG1|IL27|PTPRK|HIF3A|C8B|IFNA8|ORM2|CX3CL1|MMP20|GPR132|CCR7|CCR5|CCR2|DEFB106B|S…
6955	immune response	6.6612e-05	FCN3|CLEC4M|GPR65|CBLB|ETS1|VPREB1|CYSLTR2|RGS1|ARHGDIB|ENPP2|TRIM22|CMKLR1|WNT5A|CLEC4A|CHIT1|MAL|CCL3L3|C5AR1|TNFRSF11A|CD1C|LY9|CRHR1|C3|HRH2|CLEC7A|UBD|SLAMF7|TNFRSF14|HLA-DQA2|HLA-DQA1|CD276|LIF|PRG4|IL2|TREML1|CXCL10|IL3|IL6|VNN1|CXCL12|SP2|CD209|IL9|RAET1L|IL7R|HAMP|LAT|CXCL9|CXCL8|IL27|TREM2|CXCL1|C8B|CXCL3|CXCL2|LTB4R|CX3CL1|CXCL5|SPN|KYNU|CCR7|LBP|CCR5|PF4V1|MBL2|HLA-DPA1|CCR2|IL19|OPRM…
42221	response to chemical stimulus	0.00012561	TFRC|SLC23A1|SERPINE1|XYLT1|AQP7|MT1X|FZD10|AQP2|MT2A|GJA1|LONP1|PROK2|CMKLR1|SLC34A3|SDS|SLC34A1|RNASE2|CLPS|RBP3|KCNQ1|AGTR1|TXNIP|TRIB1|PFN1|EPAS1|FPR1|STC1|GATA3|PLA2G5|FPR2|HIF1A|KCNMB1|XCR1|FOXF1|SLC10A3|GNG11|SOX30|FOSL1|VNN1|TG|NCEH1|ID2|GPR182|ID3|HYOU1|RYR1|NRP2|BTG1|PTPRK|HIF3A|SLC6A3|CX3CL1|CCR7|CCR5|CCR2|MME|WNT9B|CYP7B1|DUSP6|IL1A|ANGPTL7|IL1B|KCNMA1|VN1R1|VN1R3|TFF1|VN1R4|TLR4|CD44…
42742	defense response to bacterium	0.00021805	DEFB129|HIST1H2BK|SERPINE1|C5AR1|DEFB125|DEFB124|DEFB123|DEFB107A|DEFB107B|SPN|RNASE7|LBP|MBL2|DEFB106B|DEFB104A|CCL20|PLA2G2A|RNASE3|DEFB133|DEFB108B|DEFB132|DEFB110|DEFB106A|HIST2H2BE|TNFRSF1A|HCK|IL6|IRF8|DEFB4A|TLR4|HAMP
6968	cellular defense response	0.00025637	ITGB1|FCMR|CXCL9|CD5L|C5AR1|LILRB2|SPN|FOSL1|NCR1|NCR2|TYROBP|CCL5|GAGE2D|CLEC5A|LBP|CD300C|CCR5|PFN1|GAGE1|CCR2
9607	response to biotic stimulus	0.00025879	IFNA7|SERPINE1|AQP2|COMT|IFNA8|SPN|CFL1|CASP1|BDKRB1|LBP|TP63|TRIM22|MBL2|IFNA13|DEFB106B|GPX2|IFNA14|IFNA16|GPX3|IFNA17|IFNGR2|WNT5A|DIO2|RNASE3|OPRM1|DEFB110|DEFB106A|DCN|HIST2H2BE|TNFRSF1A|CHIT1|IL1A|HCK|IL1B|IRF8|TRIB1|DEFB4A|TLR4|IFNA10|DEFB129|DERL3|ODC1|HIST1H2BK|C5AR1|DEFB125|DEFB124|CXCR4|DEFB123|TNFRSF11A|CD1D|MST1R|PTGS2|DEFB107A|DEFB107B|DNAJB2|THPO|CNR1|CLEC7A|CCL5|RNASE7|CCL18|IFNA2…
23052	signaling	0.00026026	ROPN1B|MAPKBP1|FZD10|GRPR|CLDN1|GJA1|NAMPT|PROK2|PROK1|CMKLR1|DAXX|TAAR8|DAPK1|GML|TAAR5|TAAR1|AGTR1|TXNIP|SKAP2|CRABP1|FPR1|FPR2|HIF1A|C3|GJC3|ADAMTS13|GALR3|NPBWR1|KCNMB1|GALR1|RHBDL3|S100A11|GPR15|GPR12|TIPARP|NR2F2|TREML1|COL1A2|GPR182|PNOC|PCDHB6|SNAI2|ARHGAP9|ACHE|GABRB2|GPR26|MED16|MED12|SMPD3|HEY1|DLGAP1|GPR139|DLGAP2|GPR39|GPR35|GPR32|IFNGR2|WNT9B|GPR31|DUSP6|GCHFR|ITPKB|ANGPTL7|OPN1MW|C…
7155	cell adhesion	0.00026026	ROPN1B|CD84|CLEC4M|CLSTN2|CTNND2|PCDH11X|ICAM2|CLDN1|ANTXR1|ISLR|CDH3|TECTA|POSTN|CD300A|OMG|CASK|HSPG2|CLEC4A|CLDN4|MAG|ADAM15|NINJ2|CBLL1|REG3A|CALCA|TTYH1|FPR2|LY9|ADAMTS13|CLEC7A|SLAMF7|IGFBP7|CDH26|AMELX|SIGLEC16|CDSN|MUC16|AMBP|FOXF1|SIGLEC10|GP5|SELE|IL2|IGSF11|VNN1|CXCL12|CD209|CNTN1|PCDHB6|DCHS1|ESAM|ITGB1|ACHE|NRP1|NRP2|ITGAM|TNFAIP6|LAMC2|PTPRK|CX3CL1|WISP2|HYAL1|ITGAX|FLOT2|ME3|ITGB6|…
22610	biological adhesion	0.00027113	ROPN1B|CD84|CLEC4M|CLSTN2|CTNND2|PCDH11X|ICAM2|CLDN1|ANTXR1|ISLR|CDH3|TECTA|POSTN|CD300A|OMG|CASK|HSPG2|CLEC4A|CLDN4|MAG|ADAM15|NINJ2|CBLL1|REG3A|CALCA|TTYH1|FPR2|LY9|ADAMTS13|CLEC7A|SLAMF7|IGFBP7|CDH26|AMELX|SIGLEC16|CDSN|MUC16|AMBP|FOXF1|SIGLEC10|GP5|SELE|IL2|IGSF11|VNN1|CXCL12|CD209|CNTN1|PCDHB6|DCHS1|ESAM|ITGB1|ACHE|NRP1|NRP2|ITGAM|TNFAIP6|LAMC2|PTPRK|CX3CL1|WISP2|HYAL1|ITGAX|FLOT2|ME3|ITGB6|…
30855	epithelial cell differentiation	0.0003577	SPRR2E|SPRR4|SPRR3|KCNE1|SPRR2G|EHF|UPK2|DLX6|HOXB13|ASCL1|LCE1B|GJA1|UPK1B|LCE3B|SPRR2A|SPRR2B|TP63|SPRR2D|CDSN|KRT4|FOXF1|NR2F2|POU2F3|PAX2|AGT|VEGFA|GDF7|LCE2B|LCE2C|LCE2A|DHRS9|WT1|LCE4A|TXNIP|ID3|SPRR1A|SPRR1B|NEUROG3
2685	regulation of leukocyte migration	0.00061938	ITGA2|WNT5A|SERPINE1|C5AR1|VEGFC|SELE|VEGFA|GREM1|CXCL10|IL6|CXCL12|ADORA1|F2RL1|BDKRB1|SLIT2
10863	positive regulation of phospholipase C activity	0.00061938	CALCA|GPR26|CHRM1|AVPR1B|GPR55|C5AR1|LPAR1|SELE|ADRA1A|LTB4R|RASGRP4|AGT|MC3R|P2RY4|AGTR1|NMUR2|DRD1|GPR139|MS4A2|MS4A1
7202	activation of phospholipase C activity	0.00061938	CALCA|GPR26|CHRM1|AVPR1B|GPR55|C5AR1|LPAR1|SELE|ADRA1A|LTB4R|RASGRP4|AGT|MC3R|P2RY4|AGTR1|NMUR2|DRD1|GPR139|MS4A2|MS4A1
31424	keratinization	0.0008438	SPRR2E|SPRR4|SPRR3|SPRR2G|LCE2B|LCE1B|LCE2C|LCE2A|LCE3B|LCE4A|SPRR2A|SPRR2B|SPRR1A|SPRR1B|SPRR2D
6875	cellular metal ion homeostasis	0.0010315	CCL14|RYR1|CCL13|CALCA|GPR26|C5AR1|HTR2B|LPAR1|CACNA1A|STC1|CXCR4|ATP2A1|CACNA1C|MCHR1|ADRA1A|P2RY4|CCL5|CCL3|PROK2|BDKRB1|CCR7|DRD1|CCR5|CCR2|CD52|XCR1|GPR12|AVPR1B|SYPL2|MT4|MT3|IL2|AGT|CXCL12|IL1B|FXYD1|KCNMA1|AGTR1|F2RL1|NMUR2|IL6ST
60429	epithelium development	0.0011819	NRP1|ERRFI1|EHF|UPK2|ARHGAP35|SPN|LCE1B|GJA1|UPK1B|CFL1|TP63|KRT4|WNT5A|CYP7B1|PAX2|TGFBR2|GREM1|LCE2B|ALDH1A3|LCE2C|SFRP1|LCE2A|TXNIP|PFN1|CD44|SPRR2E|SPRR4|SPRR3|KCNE1|SPRR2G|SEMA3C|DLX6|SRF|SEMA3A|HOXB13|ASCL1|LCE3B|RDH10|SLIT2|SPRR2A|SPRR2B|WNT3|SPRR2D|CDSN|FOXF1|VEGFC|NR2F2|POU2F3|PBX1|TBX3|AGT|VEGFA|GDF7|DHRS9|WT1|LCE4A|ID2|ID3|SPRR1A|SPRR1B|NEUROG3
7267	cell-cell signaling	0.0012327	ACHE|NRP1|GABRB2|IFNA7|CXCL9|CHRM1|TNFAIP6|CGB7|CD80|ECE2|COMT|ADRA1A|CXCL5|WISP2|SMPD3|GJA1|GABRR1|FADS6|GRM8|NAMPT|ADORA1|DLGAP1|BSN|CCR5|DLGAP2|TP63|KLF10|GHSR|CHRNB4|SLC30A8|MME|WNT9B|TAAR5|OPRM1|SYN2|SSTR3|GREM1|GCHFR|OMP|MTNR1B|CEACAM6|IL1B|KCNQ2|KCNMA1|KCNQ5|CRB1|GRIA2|CCL13|CALCA|CHAT|ASIP|LTBP4|CACNA1A|STC1|TNFRSF11A|PTHLH|ART1|ATXN3|GALR3|NPBWR1|KCNMB1|CCL5|CCL3|KCNN1|DRD1|NPTX1|PCDH1|P…
55065	metal ion homeostasis	0.0014601	CCL14|RYR1|CCL13|CALCA|GPR26|C5AR1|HTR2B|LPAR1|CACNA1A|STC1|CXCR4|ATP2A1|CACNA1C|MCHR1|ADRA1A|CPN2|P2RY4|CCL5|CCL3|PROK2|BDKRB1|CCR7|DRD1|CCR5|CCR2|CD52|XCR1|GPR12|AVPR1B|SYPL2|MT4|MT3|IL2|AGT|CXCL12|IL1B|FXYD1|KCNMA1|AGTR1|F2RL1|NMUR2|IL6ST
10518	positive regulation of phospholipase activity	0.0014613	CALCA|GPR26|CHRM1|AVPR1B|GPR55|C5AR1|LPAR1|SELE|ADRA1A|LTB4R|RASGRP4|AGT|MC3R|P2RY4|AGTR1|NMUR2|DRD1|GPR139|MS4A2|MS4A1
6873	cellular ion homeostasis	0.001672	RYR1|GAL3ST1|GPR26|TFRC|HTR2B|ATP2A1|CLDN1|ADRA1A|MT2A|AIFM3|ADORA1|PROK2|BDKRB1|CCR7|CCR5|CCR2|SLC34A3|CD52|CHRNB4|SLC30A8|AVPR1B|SYPL2|OPRM1|KCNQ1|IL1B|KCNMA1|AGTR1|MAL|IL6ST|CCL14|CCL13|KCNE1|CALCA|C5AR1|LPAR1|ATP1A4|CACNA1A|STC1|CXCR4|CACNA1C|MCHR1|CLN6|KLK6|CHRND|GJC3|P2RY4|CNR1|CCL5|CCL3|DRD1|XCR1|SLC12A5|GPR12|LGI4|MT4|SOD2|MT3|IL2|AGT|NFASC|CXCL12|FXYD1|F2RL1|NMUR2|HAMP
6928	cellular component movement	0.0021759	ITGB1|ROPN1B|NRP1|NRP2|ITGAM|BTG1|CXCL8|HTR2B|PTPRK|CXCL3|ETS1|LTB4R|CX3CL1|GJA1|CFL1|DNER|ARHGDIB|ENPP2|TEKT2|LBP|PRSS3|FEZF2|CD34|EPHA4|SDS|ITGA2|NAV1|SCNN1G|CEACAM1|IL1B|SCNN1B|PPAP2B|AGTR1|CDH13|SCG2|GAS8|CD44|CALCA|SEMA3C|SRF|DNAH5|SEMA3A|ATP1A4|FPR1|FPR2|TNFRSF11A|MST1R|ASCL1|PTGS2|AKAP4|FUT8|CCL5|CCL3|OTX2|SLIT2|DRD1|OR1D2|VEGFC|FOXJ1|NR2F2|SELE|LYVE1|PTK2|VEGFA|GDF7|EXT1|NR4A2|KLF7|IL6|NF…
30003	cellular cation homeostasis	0.0022718	CCL14|RYR1|CCL13|CALCA|GPR26|TFRC|C5AR1|HTR2B|LPAR1|ATP1A4|CACNA1A|STC1|CXCR4|ATP2A1|CACNA1C|MCHR1|ADRA1A|CLN6|MT2A|P2RY4|CCL5|CCL3|PROK2|BDKRB1|CCR7|DRD1|CCR5|CCR2|CD52|XCR1|SLC12A5|SLC30A8|GPR12|AVPR1B|SYPL2|MT4|MT3|IL2|AGT|CXCL12|IL1B|FXYD1|KCNMA1|AGTR1|F2RL1|NMUR2|IL6ST|HAMP
55082	cellular chemical homeostasis	0.0026354	RYR1|GAL3ST1|GPR26|TFRC|HTR2B|ATP2A1|CLDN1|ADRA1A|MT2A|AIFM3|ADORA1|PROK2|BDKRB1|CCR7|CCR5|CCR2|SLC34A3|CD52|CHRNB4|SLC30A8|AVPR1B|SYPL2|OPRM1|KCNQ1|IL1B|KCNMA1|AGTR1|MAL|IL6ST|CCL14|CCL13|KCNE1|CALCA|C5AR1|LPAR1|ATP1A4|CACNA1A|STC1|CXCR4|CACNA1C|MCHR1|CLN6|KLK6|CHRND|GJC3|P2RY4|CNR1|CCL5|CCL3|DRD1|XCR1|SLC12A5|GPR12|LGI4|MT4|SOD2|MT3|IL2|AGT|NFASC|CXCL12|FXYD1|F2RL1|NMUR2|HAMP
50801	ion homeostasis	0.0027975	RYR1|GAL3ST1|GPR26|TFRC|HTR2B|ATP2A1|CLDN1|ADRA1A|MT2A|AIFM3|ADORA1|PROK2|BDKRB1|CCR7|CCR5|CCR2|SLC34A3|CD52|CHRNB4|SLC30A8|AVPR1B|SLC34A1|SYPL2|OPRM1|KCNQ1|IL1B|KCNMA1|AGTR1|MAL|IL6ST|CCL14|CCL13|KCNE1|CALCA|C5AR1|LPAR1|ATP1A4|CACNA1A|STC1|CXCR4|CACNA1C|MCHR1|CPN2|CLN6|KLK6|CHRND|GJC3|P2RY4|CNR1|CCL5|CCL3|DRD1|SLC17A2|AMELX|XCR1|SLC12A5|GPR12|LGI4|MT4|SOD2|MT3|IL2|AGT|NFASC|CXCL12|FXYD1|F2RL1|NM…
2687	positive regulation of leukocyte migration	0.0027975	CXCL10|IL6|CXCL12|ITGA2|WNT5A|SERPINE1|C5AR1|VEGFC|F2RL1|BDKRB1|SELE|VEGFA
48583	regulation of response to stimulus	0.0029829	FCN3|CXCL8|SERPINE2|CD80|SERPINE1|XYLT1|IL27|C8B|CD3E|SLC6A3|CX3CL1|SPN|MECOM|PLAU|ADORA1|CASP1|CD37|LBP|MAP3K5|MBL2|GHSR|DAXX|GPX2|ITGA2|WNT5A|AXIN1|GP1BA|OPRM1|TNFRSF1B|TNFRSF1A|GREM1|NCR1|IL1A|NPC1|IL1B|AGTR1|CDH13|IL6ST|TRIB1|MS4A2|CD46|MS4A1|TLR4|SCG2|CD44|C1QB|SERPINC1|C5AR1|CXCR4|TNFRSF11A|CD1D|PTGS2|RTN4|C3|CD79A|NT5E|CNR1|CLEC7A|CCL5|SLIT2|DRD1|CD276|SOCS5|AMBP|CMA1|PLA2G2A|VEGFC|FOXJ1|S…
50920	regulation of chemotaxis	0.0029829	CXCL8|ITGA2|WNT5A|SERPINE1|C5AR1|VEGFC|CXCR4|VEGFA|GREM1|CXCL10|IL6|CXCL12|F2RL1|CDH13|SLIT2|SCG2
10517	regulation of phospholipase activity	0.0030224	CALCA|GPR26|CHRM1|AVPR1B|GPR55|C5AR1|LPAR1|SELE|ADRA1A|LTB4R|RASGRP4|AGT|MC3R|P2RY4|AGTR1|NMUR2|DRD1|GPR139|MS4A2|MS4A1
50921	positive regulation of chemotaxis	0.0030427	CXCL8|ITGA2|WNT5A|SERPINE1|C5AR1|VEGFC|VEGFA|CXCL10|IL6|CXCL12|F2RL1|CDH13|SLIT2|SCG2
10574	regulation of vascular endothelial growth factor production	0.0034216	C3|IL1A|IL6|IL1B|C5AR1|IL6ST|PTGS2|HIF1A
7187	G-protein signaling, coupled to cyclic nucleotide second messenger	0.0034798	GPR26|ADCY4|FPR1|MCHR1|ADRA1A|CRHR1|PTHLH|GRK5|CNR1|HRH2|RGS1|GALR1|ADORA1|DRD1|XCR1|AVPR1B|AVPR2|GLP2R|OPRK1|GPR3|OPRM1|SSTR3|AGT|MC3R|MTNR1A|MTNR1B|MC5R
30216	keratinocyte differentiation	0.0037071	SPRR2E|SPRR4|SPRR3|SPRR2G|CDSN|POU2F3|LCE2B|LCE1B|LCE2C|LCE2A|LCE3B|LCE4A|TXNIP|SPRR2A|SPRR2B|SPRR1A|SPRR1B|SPRR2D
48520	positive regulation of behavior	0.003737	CXCL8|ITGA2|WNT5A|SERPINE1|C5AR1|VEGFC|VEGFA|CXCL10|IL6|CXCL12|CASP1|F2RL1|CDH13|SLIT2|SCG2
50795	regulation of behavior	0.0039184	CXCL8|ITGA2|WNT5A|SERPINE1|C5AR1|VEGFC|CXCR4|VEGFA|GREM1|CXCL10|IL6|CXCL12|CNR1|CASP1|F2RL1|CDH13|SLIT2|DRD1|SCG2
2688	regulation of leukocyte chemotaxis	0.0042592	GREM1|CXCL10|IL6|CXCL12|WNT5A|SERPINE1|C5AR1|VEGFC|F2RL1|SLIT2|VEGFA
2682	regulation of immune system process	0.0047291	FCN3|CD80|SERPINE1|IL27|CBLB|RORA|C8B|CD3E|ETS1|ORM2|SPN|ADORA1|BDKRB1|CD37|LBP|MBL2|KLF10|GPX2|ITGA2|WNT5A|RUNX1|TGFBR2|GREM1|NCR1|ITPKB|IL1B|IL6ST|MS4A2|CD46|MS4A1|TLR4|CD44|C1QB|CALCA|C5AR1|CD1D|HIF1A|C3|CD79A|CNR1|CLEC7A|CCL5|SLAMF7|TNFRSF14|SLIT2|CD276|SOCS5|AMBP|MOG|GPR55|LIF|VEGFC|FOXJ1|SELE|IL2|VEGFA|NFKBIA|CXCL10|IL6|VNN1|CXCL12|FAP|ID2|CFHR5|F2RL1|IL7R|INHA|BCAR1|LAT|C1QC
60193	positive regulation of lipase activity	0.0047291	CALCA|GPR26|CHRM1|AVPR1B|GPR55|C5AR1|LPAR1|SELE|ADRA1A|LTB4R|RASGRP4|AGT|MC3R|P2RY4|AGTR1|NMUR2|DRD1|GPR139|MS4A2|MS4A1
51674	localization of cell	0.0047291	ITGB1|ROPN1B|NRP1|NRP2|ITGAM|BTG1|CXCL8|HTR2B|PTPRK|CXCL3|ETS1|CX3CL1|GJA1|CFL1|DNER|TEKT2|LBP|PRSS3|CD34|SDS|NAV1|SCNN1G|CEACAM1|IL1B|SCNN1B|PPAP2B|AGTR1|CDH13|SCG2|GAS8|CD44|CALCA|SEMA3C|SRF|DNAH5|ATP1A4|TNFRSF11A|ASCL1|AKAP4|FUT8|CCL5|SLIT2|DRD1|VEGFC|FOXJ1|NR2F2|SELE|PTK2|VEGFA|NR4A2|IL6|FAP|TNP2|BCAR1|CDK5R1
48870	cell motility	0.0047291	ITGB1|ROPN1B|NRP1|NRP2|ITGAM|BTG1|CXCL8|HTR2B|PTPRK|CXCL3|ETS1|CX3CL1|GJA1|CFL1|DNER|TEKT2|LBP|PRSS3|CD34|SDS|NAV1|SCNN1G|CEACAM1|IL1B|SCNN1B|PPAP2B|AGTR1|CDH13|SCG2|GAS8|CD44|CALCA|SEMA3C|SRF|DNAH5|ATP1A4|TNFRSF11A|ASCL1|AKAP4|FUT8|CCL5|SLIT2|DRD1|VEGFC|FOXJ1|NR2F2|SELE|PTK2|VEGFA|NR4A2|IL6|FAP|TNP2|BCAR1|CDK5R1
6874	cellular calcium ion homeostasis	0.0047323	CCL14|RYR1|CCL13|CALCA|GPR26|C5AR1|HTR2B|LPAR1|CACNA1A|STC1|CXCR4|ATP2A1|CACNA1C|MCHR1|ADRA1A|P2RY4|CCL5|CCL3|PROK2|BDKRB1|CCR7|DRD1|CCR5|CCR2|CD52|XCR1|GPR12|AVPR1B|SYPL2|IL2|CXCL12|IL1B|FXYD1|AGTR1|F2RL1|NMUR2|IL6ST
42060	wound healing	0.0047991	SPRR3|SERPINC1|SRF|SERPINE1|TFPI|HIF1A|CX3CL1|KLK6|GJA1|ADAMTS13|CDH3|PLAU|SERPINB2|MME|F10|ITGA2|IFNGR2|WNT5A|TFPI2|NRG1|GP1BA|TM4SF4|OPRM1|GP5|POU2F3|DCN|DCBLD2|TREML1|IL22RA1|IL1A|SCNN1G|IL6|KLF6|LOX|MMRN1|NINJ2|IL1B|SCNN1B|CD44
7204	elevation of cytosolic calcium ion concentration	0.0049336	RYR1|CALCA|GPR26|C5AR1|HTR2B|LPAR1|CACNA1A|CXCR4|CACNA1C|MCHR1|ADRA1A|P2RY4|PROK2|BDKRB1|CCR7|DRD1|CCR5|CCR2|CD52|XCR1|AVPR1B|IL2|IL1B|AGTR1|F2RL1|NMUR2
9888	tissue development	0.0053073	ERRFI1|EHF|UPK2|SERPINE1|ARHGAP35|LCE1B|GJA1|PLAU|CFL1|TP63|SOX5|GHSR|POSTN|SDS|KRT4|WNT5B|WNT5A|TM4SF4|LCE2B|LCE2C|MYL6|SFRP1|LCE2A|NINJ2|TXNIP|HOXB3|TRIM15|PFN1|SPRR2E|KCNE1|SPRR2G|DLX6|CHAT|KLK5|HOXB13|HIF1A|KLK6|RDH10|SPRR2A|SPRR2B|AMELX|AMELY|WNT3|SPRR2D|CDSN|TIPARP|FOXF1|LIF|PRG1|NR2F2|POU2F3|PBX1|GDF7|SMAD7|EXT1|CYP26A1|RCAN1|COL1A2|ID2|SNAI2|ID3|SPRR1A|SPRR1B|NRP1|NRP2|HTR2B|LAMC2|SPN|UPK…
2237	response to molecule of bacterial origin	0.005771	SERPINE1|C5AR1|TNFRSF11A|AQP2|COMT|PTGS2|THPO|CNR1|CCL5|CASP1|BDKRB1|LBP|WNT5A|DIO2|FMO1|OPRM1|SELE|DCN|ASS1|TNFRSF1A|NFKBIA|IL1A|CXCL10|IL6|TG|IL1B|TRIB1|TLR4
31347	regulation of defense response	0.006474	SERPINC1|SERPINE1|IL27|TNFRSF11A|CD1D|PTGS2|CX3CL1|SPN|C3|NT5E|CNR1|CLEC7A|CCL5|ADORA1|LBP|CD276|GHSR|GPX2|CMA1|ITGA2|PLA2G2A|TNFRSF1B|SELE|IL2|AGT|TNFRSF1A|NCR1|NFKBIA|IL6|IL1B|AGTR1|IL6ST|TLR4
32496	response to lipopolysaccharide	0.0073114	SERPINE1|TNFRSF11A|AQP2|COMT|PTGS2|THPO|CNR1|CCL5|CASP1|BDKRB1|LBP|WNT5A|DIO2|FMO1|OPRM1|SELE|DCN|ASS1|TNFRSF1A|NFKBIA|IL1A|CXCL10|TG|IL1B|TRIB1|TLR4
19935	cyclic-nucleotide-mediated signaling	0.0073114	GPR26|ADCY4|FPR1|MCHR1|ADRA1A|CRHR1|PTHLH|PDZD3|GRK5|CNR1|HRH2|RGS1|GALR1|ADORA1|DRD1|XCR1|AVPR1B|AVPR2|GLP2R|OPRK1|GPR3|OPRM1|SSTR3|AGT|MC3R|MTNR1A|MTNR1B|MC5R
48584	positive regulation of response to stimulus	0.0073114	C1QB|FCN3|CXCL8|SERPINE1|C5AR1|TNFRSF11A|CD1D|C8B|PTGS2|CD3E|CX3CL1|C3|CD79A|CNR1|CLEC7A|CCL5|CASP1|SLIT2|LBP|MBL2|GHSR|ITGA2|WNT5A|PLA2G2A|AXIN1|VEGFC|OPRM1|AGT|TNFRSF1A|VEGFA|HIPK2|NFKBIA|IL1A|CXCL10|IL6|CXCL12|BRE|IL1B|AGTR1|CFHR5|F2RL1|CDH13|IL6ST|CD46|TLR4|SCG2|BCAR1|C1QC
10575	positive regulation vascular endothelial growth factor production	0.0073257	C3|IL1A|IL1B|C5AR1|IL6ST|PTGS2|HIF1A
32102	negative regulation of response to external stimulus	0.0073415	GHSR|GPX2|SERPINC1|SERPINE1|XYLT1|TNFRSF1B|IL2|SLC6A3|SPN|GREM1|NT5E|NPC1|ADORA1|SLIT2|DRD1|CD276
51480	cytosolic calcium ion homeostasis	0.0075117	RYR1|CALCA|GPR26|C5AR1|HTR2B|LPAR1|CACNA1A|CXCR4|CACNA1C|MCHR1|ADRA1A|P2RY4|PROK2|BDKRB1|CCR7|DRD1|CCR5|CCR2|CD52|XCR1|AVPR1B|IL2|IL1B|AGTR1|F2RL1|NMUR2|IL6ST
2675	positive regulation of acute inflammatory response	0.0077003	C3|IL6|CNR1|IL1B|CCL5|TNFRSF11A|IL6ST|PTGS2
9913	epidermal cell differentiation	0.0081107	SPRR2E|SPRR4|SPRR3|SPRR2G|CDSN|POU2F3|LCE2B|LCE1B|LCE2C|LCE2A|LCE3B|LCE4A|TXNIP|SPRR2A|SPRR2B|SPRR1A|SPRR1B|SPRR2D
40012	regulation of locomotion	0.0081463	CHRM1|CXCL8|LAMA2|SERPINE2|SEMA3A|SERPINE1|C5AR1|CXCR4|PTPRK|PTGS2|HIF1A|RTN4|PLAU|ADORA1|ENPP2|BDKRB1|SLIT2|DRD1|WNT5B|F10|FOXF1|ITGA2|IGFBP3|WNT5A|VEGFC|NR2F2|PODN|SELE|MMP9|AGT|VEGFA|SMAD7|GREM1|CXCL10|IL6|CXCL12|ABI3|F2RL1|CDH13|IL6ST|TRIB1|CBLL1|SCG2|BCAR1
55074	calcium ion homeostasis	0.0086107	CCL14|RYR1|CCL13|CALCA|GPR26|C5AR1|HTR2B|LPAR1|CACNA1A|STC1|CXCR4|ATP2A1|CACNA1C|MCHR1|ADRA1A|P2RY4|CCL5|CCL3|PROK2|BDKRB1|CCR7|DRD1|CCR5|CCR2|CD52|XCR1|GPR12|AVPR1B|SYPL2|IL2|CXCL12|IL1B|FXYD1|AGTR1|F2RL1|NMUR2|IL6ST
55080	cation homeostasis	0.0089409	RYR1|GPR26|TFRC|HTR2B|ATP2A1|ADRA1A|MT2A|PROK2|BDKRB1|CCR7|CCR5|CCR2|CD52|SLC30A8|AVPR1B|SYPL2|IL1B|KCNMA1|AGTR1|IL6ST|CCL14|CCL13|CALCA|C5AR1|LPAR1|ATP1A4|CACNA1A|STC1|CXCR4|CACNA1C|MCHR1|CPN2|CLN6|P2RY4|CCL5|CCL3|DRD1|XCR1|SLC12A5|GPR12|MT4|SOD2|MT3|IL2|AGT|CXCL12|FXYD1|F2RL1|NMUR2|HAMP
60326	cell chemotaxis	0.010801	CALCA|SDS|ITGAM|CXCL8|TNFRSF11A|CXCL3|CX3CL1|VEGFA|IL6|IL1B|CCL5|AGTR1|LBP|SCG2
30334	regulation of cell migration	0.011167	LAMA2|SERPINE2|SEMA3A|SERPINE1|C5AR1|PTPRK|PTGS2|HIF1A|RTN4|PLAU|ADORA1|ENPP2|BDKRB1|SLIT2|DRD1|WNT5B|F10|FOXF1|ITGA2|IGFBP3|WNT5A|VEGFC|NR2F2|PODN|SELE|MMP9|AGT|VEGFA|SMAD7|GREM1|CXCL10|IL6|CXCL12|ABI3|F2RL1|CDH13|IL6ST|TRIB1|CBLL1|BCAR1
30595	leukocyte chemotaxis	0.011554	CALCA|SDS|ITGAM|CXCL8|TNFRSF11A|CXCL3|CX3CL1|VEGFA|IL6|IL1B|CCL5|LBP|SCG2
51270	regulation of cellular component movement	0.012508	NRP1|SP100|LAMA2|SERPINE2|SEMA3A|SERPINE1|C5AR1|PTPRK|PTGS2|ETS1|HIF1A|RTN4|PLAU|ADORA1|ENPP2|BDKRB1|SLIT2|DRD1|WNT5B|F10|FOXF1|ITGA2|IGFBP3|WNT5A|VEGFC|NR2F2|PODN|SELE|MMP9|AGT|VEGFA|SMAD7|GREM1|CXCL10|IL6|CXCL12|ABI3|F2RL1|CDH13|IL6ST|TRIB1|CBLL1|BCAR1
31349	positive regulation of defense response	0.013016	ITGA2|PLA2G2A|SERPINE1|TNFRSF11A|CD1D|PTGS2|AGT|CX3CL1|TNFRSF1A|C3|NFKBIA|IL6|CNR1|CLEC7A|IL1B|CCL5|AGTR1|LBP|IL6ST|TLR4
30005	cellular di-, tri-valent inorganic cation homeostasis	0.014073	CCL14|RYR1|CCL13|CALCA|GPR26|TFRC|C5AR1|HTR2B|LPAR1|CACNA1A|STC1|CXCR4|ATP2A1|CACNA1C|MCHR1|ADRA1A|MT2A|P2RY4|CCL5|CCL3|PROK2|BDKRB1|CCR7|DRD1|CCR5|CCR2|CD52|XCR1|SLC30A8|GPR12|AVPR1B|SYPL2|IL2|CXCL12|IL1B|FXYD1|AGTR1|F2RL1|NMUR2|IL6ST|HAMP
45766	positive regulation of angiogenesis	0.014205	BTG1|WNT5A|SERPINE1|C5AR1|PTGS2|HIF1A|CX3CL1|TNFRSF1A|VEGFA|RUNX1|C3|IL1A|IL1B
2690	positive regulation of leukocyte chemotaxis	0.014205	CXCL10|IL6|CXCL12|WNT5A|SERPINE1|C5AR1|VEGFC|F2RL1|VEGFA
30001	metal ion transport	0.014779	RYR1|KCNK6|STEAP3|SLC23A1|HTR2B|ATP2A3|ATP2A1|ADRA1A|SLC39A5|SLC34A3|SLC13A2|KCNH4|TRPC5|SLC30A8|SLC34A1|KCNK16|KCNK17|DNM2|SCNN1G|TMEM37|KCNQ1|SCNN1B|KCNQ2|KCNMA1|KCNA10|SGK1|SCN4B|KCTD15|CAMK2B|KCNE1|TTYH1|KCNA2|ATP1A4|SLC5A12|CACNA1A|ITPR2|CACNA1C|ATP2C2|SLC5A2|KCTD21|KCNMB1|KCNN1|CLCA1|SLC38A9|SLC38A8|SLC17A1|MSC|SLC17A2|SLC38A2|CACNG3|CACNG4|CACNG5|KCNJ4|SLC10A6|XCR1|SLC12A5|SLC10A1|KCNJ12|S…
7586	digestion	0.016527	CHRM3|PRSS1|SLC15A1|NPY4R|CTRB2|CTRB1|AKR1D1|AQP5|MUC3A|PGC|PGA5|CAPN9|CLPS|CTRL|FAP|GALR1|KCNMA1|TFF1|PRSS3|PRSS2|TLR4
2684	positive regulation of immune system process	0.018118	C1QB|FCN3|CD80|SERPINE1|C5AR1|CBLB|CD1D|C8B|CD3E|SPN|C3|CD79A|CNR1|CLEC7A|BDKRB1|CD37|LBP|CD276|MBL2|SOCS5|MOG|ITGA2|WNT5A|VEGFC|FOXJ1|SELE|IL2|VEGFA|TGFBR2|ITPKB|NFKBIA|CXCL10|IL6|VNN1|CXCL12|IL1B|CFHR5|F2RL1|IL6ST|IL7R|MS4A2|CD46|MS4A1|TLR4|BCAR1|C1QC
60191	regulation of lipase activity	0.018941	CALCA|GPR26|CHRM1|AVPR1B|GPR55|C5AR1|LPAR1|SELE|ADRA1A|LTB4R|RASGRP4|AGT|MC3R|P2RY4|APOC1|AGTR1|NMUR2|DRD1|GPR139|MS4A2|MS4A1
42127	regulation of cell proliferation	0.019878	CHRM1|CD80|SERPINE1|CBLB|GRPR|COMT|ETS1|GJA1|CCND2|PLAU|ZMIZ1|NAMPT|ADORA1|TNFRSF8|TP63|PROK1|RPS9|KRT4|IGFBP3|GML|WNT5A|FLT3LG|BTC|SFRP1|AGTR1|TXNIP|IL6ST|TRIB1|SCG2|SKAP2|DLX6|CCL3L3|TNFRSF11A|MST1R|HIF1A|THPO|TNFRSF14|UTP20|IGFBP7|S100A11|CD276|EGR4|FOXF1|ST8SIA1|LIF|NR2F2|PBX1|IL2|FOSL1|NFKBIA|CXCL10|IL3|IL6|ID2|IL9|SP6|TCF4|FGFR2|NRP1|BTG1|CXCL8|HTR2B|IL27|CXCL1|PTPRK|CD3E|ADRA1A|CXCL5|WISP2…
19932	second-messenger-mediated signaling	0.020631	CALCA|GPR26|CHRM1|CXCL8|HTR2B|ADCY4|FPR1|MCHR1|ADRA1A|LTB4R|CRHR1|PTHLH|PDZD3|GRK5|P2RY4|CNR1|HRH2|RGS1|GALR1|ADORA1|DRD1|GPR139|XCR1|AVPR1B|AVPR2|GLP2R|OPRK1|GPR3|OPRM1|SELE|SSTR3|AGT|TREML1|MC3R|RCAN1|MTNR1A|MTNR1B|MC5R|AGTR1|NMUR2|LAT
50900	leukocyte migration	0.020734	CALCA|SDS|ITGAM|CXCL8|FOXJ1|TNFRSF11A|CXCL3|SELE|CX3CL1|VEGFA|IL6|IL1B|CCL5|LBP|CD34|SCG2
7154	cell communication	0.021443	CHRM1|CD80|FZD10|AQP2|COMT|CLDN1|GJA1|FADS6|NAMPT|ADORA1|BSN|TP63|GHSR|CHRNB4|SLC30A8|WNT5B|WNT5A|TAAR5|OMP|MTNR1B|KCNQ2|MAL|KCNQ5|GRIA2|CALCA|CHAT|LTBP4|CACNA1A|STC1|TNFRSF11A|KLK6|ART1|ATXN3|GJC3|LDHA|INPP5A|GALR3|NPBWR1|KCNMB1|KCNN1|DRD1|NPTX1|ASIC2|WNT3|NTSR1|EGR3|SRD5A2|PTK2|IL2|FOSL1|NR4A2|CXCL10|IL3|IL6|PNOC|PCDHB6|SNAI2|NMUR2|FGF11|ACHE|NRP1|GABRB2|IFNA7|CXCL9|GAL3ST1|TNFAIP6|CGB7|ECE2|AD…
30817	regulation of cAMP biosynthetic process	0.022551	CALCA|GPR26|GPR65|AVPR2|ADCY4|OPRK1|GPR3|OPRM1|MCHR1|CRHR1|PTHLH|MRAP|MC3R|GALR3|RGS1|GNG7|GALR1|MC5R|GRM8|ADORA1|OXER1|DRD1|MRAP2|CCR2
43589	skin morphogenesis	0.023165	ERRFI1|COL1A2|ITGA2|TP63
55066	di-, tri-valent inorganic cation homeostasis	0.024872	CCL14|RYR1|CCL13|CALCA|GPR26|TFRC|C5AR1|HTR2B|LPAR1|CACNA1A|STC1|CXCR4|ATP2A1|CACNA1C|MCHR1|ADRA1A|MT2A|P2RY4|CCL5|CCL3|PROK2|BDKRB1|CCR7|DRD1|CCR5|CCR2|CD52|XCR1|SLC30A8|GPR12|AVPR1B|SYPL2|SOD2|IL2|CXCL12|IL1B|FXYD1|AGTR1|F2RL1|NMUR2|IL6ST|HAMP
30802	regulation of cyclic nucleotide biosynthetic process	0.025861	CALCA|GPR26|GPR65|ADCY4|MCHR1|CRHR1|PTHLH|PDZD3|GALR3|RGS1|GNG7|GALR1|GRM8|ADORA1|OXER1|DRD1|CCR2|AVPR2|OPRK1|GPR3|OPRM1|MRAP|MC3R|MC5R|MRAP2
30808	regulation of nucleotide biosynthetic process	0.025861	CALCA|GPR26|GPR65|ADCY4|MCHR1|CRHR1|PTHLH|PDZD3|GALR3|RGS1|GNG7|GALR1|GRM8|ADORA1|OXER1|DRD1|CCR2|AVPR2|OPRK1|GPR3|OPRM1|MRAP|MC3R|MC5R|MRAP2
16477	cell migration	0.027776	ITGB1|NRP1|NRP2|CALCA|ITGAM|BTG1|CXCL8|SEMA3C|SRF|HTR2B|TNFRSF11A|PTPRK|ASCL1|CXCL3|CX3CL1|GJA1|FUT8|CCL5|CFL1|DNER|SLIT2|DRD1|LBP|PRSS3|CD34|SDS|VEGFC|FOXJ1|NAV1|NR2F2|SELE|PTK2|VEGFA|NR4A2|SCNN1G|IL6|CEACAM1|FAP|IL1B|SCNN1B|PPAP2B|AGTR1|CDH13|SCG2|BCAR1|CD44|CDK5R1
30814	regulation of cAMP metabolic process	0.027776	CALCA|GPR26|GPR65|AVPR2|ADCY4|OPRK1|GPR3|OPRM1|MCHR1|CRHR1|PTHLH|MRAP|MC3R|GALR3|RGS1|GNG7|GALR1|MC5R|GRM8|ADORA1|OXER1|DRD1|MRAP2|CCR2
19725	cellular homeostasis	0.02828	RYR1|GAL3ST1|GPR26|TFRC|HTR2B|ATP2A1|AQP2|CLDN1|ADRA1A|MT2A|AIFM3|ADORA1|PROK2|BDKRB1|SH3BGRL3|CCR7|CCR5|CCR2|SLC34A3|CD52|CHRNB4|SLC30A8|AVPR1B|SYPL2|OPRM1|KCNQ1|IL1B|KCNMA1|AGTR1|MAL|IL6ST|CCL14|CCL13|KCNE1|CALCA|SRF|C5AR1|LPAR1|ATP1A4|CACNA1A|STC1|CXCR4|CACNA1C|MCHR1|CLN6|KLK6|CHRND|GJC3|P2RY4|CNR1|LARGE|CCL5|CCL3|TXNDC2|DRD1|EGLN2|XCR1|SLC12A5|GPR12|LGI4|MT4|SOD2|MT3|IL2|AGT|NFASC|CXCL12|FXYD…
80134	regulation of response to stress	0.029165	SERPINE2|SERPINE1|XYLT1|IL27|CX3CL1|SPN|MECOM|PLAU|ADORA1|LBP|MAP3K5|GHSR|DAXX|GPX2|ITGA2|WNT5A|AXIN1|GP1BA|TNFRSF1B|TNFRSF1A|NCR1|IL1A|NPC1|IL1B|AGTR1|IL6ST|TLR4|SCG2|CD44|SERPINC1|TNFRSF11A|CD1D|PTGS2|RTN4|C3|NT5E|CNR1|CLEC7A|CCL5|CD276|AMBP|CMA1|PLA2G2A|SELE|IL2|AGT|HIPK2|NFKBIA|IL6|PROC|BRE|F2RL1
7565	female pregnancy	0.031763	CALCA|CSH2|CSH1|PZP|PRL|AQP2|COMT|PTGS2|CRHR1|PTHLH|PLAU|CNR1|EPYC|IGFBP7|GHSR|AMBP|IL11RA|GPX3|FSHB|LIF|FOSL1|IL1B|PAPPA|PSG7|SCG2
40017	positive regulation of locomotion	0.032708	CXCL8|SERPINE1|C5AR1|PTGS2|HIF1A|BDKRB1|SLIT2|DRD1|WNT5B|F10|FOXF1|ITGA2|WNT5A|VEGFC|SELE|MMP9|AGT|VEGFA|CXCL10|IL6|CXCL12|F2RL1|CDH13|IL6ST|CBLL1|SCG2|BCAR1
8544	epidermis development	0.034346	SPRR2E|SPRR4|ERRFI1|SPRR3|SPRR2G|KLK5|LAMC2|HOXB13|PTGS2|PTHLH|LCE1B|LCE3B|FLOT2|KRTAP5-1|SPRR2A|SPRR2B|TP63|SPRR2D|KRTAP5-9|CDSN|ITGA2|KLK14|KRT34|POU2F3|LCE2B|LCE2C|COL1A2|LCE2A|LCE4A|KRT16|TXNIP|KRTAP21-1|SPRR1A|SPRR1B
30799	regulation of cyclic nucleotide metabolic process	0.034965	CALCA|GPR26|GPR65|ADCY4|MCHR1|CRHR1|PTHLH|PDZD3|GALR3|RGS1|GNG7|GALR1|GRM8|ADORA1|OXER1|DRD1|CCR2|AVPR2|OPRK1|GPR3|OPRM1|MRAP|MC3R|MC5R|MRAP2
7188	G-protein signaling, coupled to cAMP nucleotide second messenger	0.038563	GPR26|AVPR1B|AVPR2|GLP2R|ADCY4|FPR1|OPRK1|GPR3|OPRM1|MCHR1|ADRA1A|CRHR1|PTHLH|MC3R|GRK5|RGS1|GALR1|ADORA1|DRD1
31620	regulation of fever	0.040543	CNR1|IL1B|CCL5|TNFRSF11A|PTGS2
31622	positive regulation of fever	0.040543	CNR1|IL1B|CCL5|TNFRSF11A|PTGS2
48878	chemical homeostasis	0.04064	RYR1|GAL3ST1|GPR26|TFRC|SERPINE1|HTR2B|ATP2A1|SLC2A4|CLDN1|ADRA1A|MT2A|AIFM3|ADORA1|PROK2|BDKRB1|CCR7|CCR5|CCR2|SLC34A3|CD52|CHRNB4|SLC30A8|AVPR1B|SLC34A1|SYPL2|OPRM1|NPC1|KCNQ1|IL1B|KCNMA1|MALL|AGTR1|MAL|IL6ST|CCL14|CCL13|KCNE1|CALCA|EPAS1|C5AR1|LPAR1|ATP1A4|CACNA1A|STC1|CXCR4|CACNA1C|MCHR1|HIF1A|CPN2|CLN6|KLK6|CHRND|GJC3|P2RY4|CNR1|CCL5|CCL3|DRD1|SLC17A2|AMELX|RPH3AL|XCR1|SLC12A5|GPR12|LGI4|MT4…
48585	negative regulation of response to stimulus	0.042571	SERPINC1|SERPINE1|XYLT1|RTN4|SLC6A3|SPN|NT5E|MECOM|ADORA1|SLIT2|DRD1|CD276|GHSR|GPX2|AMBP|FOXJ1|TNFRSF1B|IL2|GREM1|NPC1|IL1B|TRIB1|IL7R|SCG2|CD44
2673	regulation of acute inflammatory response	0.042757	SPN|C3|IL6|CNR1|IL1B|CCL5|TNFRSF11A|IL6ST|PTGS2
1944	vasculature development	0.046298	NRP1|ERRFI1|COL15A1|CALCA|CXCL8|SEMA3C|EPAS1|SRF|CXCL17|HOXB13|RTN4|CX3CL1|ZFP36L1|GJA1|FOXS1|PLAU|ZMIZ1|ANPEP|PROK2|SLIT2|TIPARP|FOXF1|MMP2|LIF|VEGFC|NR2F2|HSPG2|TBX3|PTK2|AGT|VEGFA|SMAD7|TGFBR2|CEACAM1|COL1A2|ADAM15|LOX|FAP|WT1|PPAP2B|CDH13|HOXB3|TCF4|SCG2|CD44
32844	regulation of homeostatic process	0.047035	RYR1|CALCA|HTR2B|TNFRSF11B|TNFRSF11A|PTGS2|ETS1|HIF1A|CNR1|CCL5|BDKRB1|DRD1|XCR1|SLC30A8|AVPR1B|IL2|AGT|VEGFA|SMAD7|BTC|P2RX2|IL1B|AGTR1|MS4A2|MS4A1|CD44

## Sheet: Down-Regulated Process Terms
GO-ID	Biological Process Term	FDR p-value	Genes in test set
44237	cellular metabolic process	8.4552e-37	POP5|UXS1|ATP5C1|EHMT1|LSM10|PSMD8|PREX1|PSMD4|AKT2|ALKBH1|AKT1|PRKACA|GABARAPL2|PRKAB2|CSNK2A2|ISL1|DDX39B|MTHFD2|DDIT3|UQCRC1|TBPL1|ATF3|ATF4|TSTA3|MTMR3|AASDH|SHMT2|SHMT1|BAZ2A|MRPL14|OAZ1|C12ORF65|PRPSAP1|FIGNL1|AFMID|PIP5K1A|LTA4H|ABCA1|CREBBP|PMM1|EIF2AK1|MRPL28|EIF2AK4|MRPL21|SNUPN|MRPL22|MRPL30|QARS|TDP2|FASN|NMT2|DZIP3|RNF220|PIGP|RPLP0|PRKAG1|MRPL34|PIGX|MRPL41|CHAF1A|OLR1|LRRC47|DUSP5|…
8152	metabolic process	1.1609e-24	POP5|OSGEPL1|UXS1|ATP5C1|EHMT1|ALKBH6|LSM10|PSMD8|PREX1|ALKBH5|PSMD4|AKT2|ALKBH1|AKT1|PRKACA|GABARAPL2|PRKAB2|CSNK2A2|ISL1|DDX39B|MTHFD2|DDIT3|UQCRC1|TBPL1|ATF3|ATF4|TSTA3|MTMR3|AASDH|SHMT2|SHMT1|BAZ2A|MRPL14|OAZ1|C12ORF65|PRPSAP1|FIGNL1|AFMID|PIP5K1A|LTA4H|ABCA1|GSTM3|CREBBP|PMM1|EIF2AK1|MRPL28|EIF2AK4|MRPL21|SNUPN|MRPL22|MRPL30|UCK1|QARS|TDP2|FASN|NMT2|DZIP3|RNF220|PIGP|RPLP0|PRKAG1|OSBPL11|MRP…
44260	cellular macromolecule metabolic process	3.9437e-23	POP5|RPL3|RPL32|RPL31|EHMT1|EPRS|DCAF7|LSM10|PSMD8|NUB1|RNF115|PSMD4|AKT2|ALKBH1|AKT1|PLCE1|RPL35|PRKACA|JUNB|PRKCI|PRKCD|CSNK2A2|MED4|CLPX|DDX39B|WDR82|DDIT3|TBPL1|RPL24|TARS2|RPL27|PRKD1|ASF1A|MTMR3|ANAPC16|CTBP1|PRKDC|HSPA4L|XPA|BAZ2A|XPC|MRPL14|PRKCZ|C12ORF65|PTPMT1|ST3GAL3|ABCA1|CREBBP|EIF2AK1|PLK2|NFATC3|MRPL28|EIF2AK4|MRPL21|SNUPN|WDR55|MRPL22|MRPL30|PPP5C|NPLOC4|QARS|TDP2|HNRNPF|PPT1|NMT2…
44238	primary metabolic process	1.1901e-19	POP5|OSGEPL1|ATP5C1|EHMT1|LSM10|PSMD8|PSMD4|AKT2|ALKBH1|AKT1|PRKACA|PRKAB2|CSNK2A2|DDX39B|DDIT3|UQCRC1|TBPL1|ATF3|ATF4|TSTA3|MTMR3|AASDH|SHMT2|SHMT1|BAZ2A|MRPL14|OAZ1|C12ORF65|PRPSAP1|FIGNL1|AFMID|PIP5K1A|LTA4H|ABCA1|CREBBP|PMM1|EIF2AK1|MRPL28|EIF2AK4|MRPL21|SNUPN|MRPL22|MRPL30|QARS|TDP2|FASN|NMT2|DZIP3|RNF220|PIGP|RPLP0|PRKAG1|OSBPL11|MRPL34|PIGX|MRPL41|CHAF1A|OLR1|LRRC47|DUSP5|RMI2|ARG2|DFFA|CN…
34641	cellular nitrogen compound metabolic process	1.4957e-18	POP5|PANK2|SMARCB1|ATP5C1|NUDT5|EPRS|LSM10|RPS14|SNRPD2|RPS19|ALKBH1|AKT1|ARL6IP4|SNRPD3|JUNB|MCCC2|ATP6V0E1|TINF2|CIRBP|NSMCE1|CSNK1D|IMP4|CSNK1E|MED4|MIF4GD|KARS|DDX39B|RRAGC|DDIT3|KCTD13|TBPL1|CD2BP2|TARS2|ASF1A|ATF4|TSTA3|DHX8|SHMT2|PRKDC|SHMT1|XPA|BAZ2A|XPC|ATP5I|RTF1|OAZ1|PRPSAP1|CHTF8|FIGNL1|AFMID|HLTF|SYMPK|HMOX2|RBM10|CDT1|APOBEC3F|APOBEC3G|GADD45A|XRCC3|NFATC3|SNUPN|WDR55|ALDH6A1|PPP5C|…
6996	organelle organization	9.1736e-18	SMARCB1|EHMT1|RPS14|PREX1|CDC23|OPHN1|AKT1|KAT8|PLCE1|PRKACA|ATXN7L3|TSPYL2|SMARCC1|PRKCI|CXADR|SMARCC2|LIMCH1|COG4|TINF2|ACTN4|MIF|NISCH|DAAM1|WDR82|KCTD13|TBPL1|RPL24|TRIM16|EZR|OPTN|ASF1A|LLGL1|PFN2|ANAPC16|PRKDC|CDCA5|STXBP1|BAZ2A|RTF1|PRKCZ|PRDX3|DSN1|NUAK2|BLOC1S1|EPB41L2|HLTF|INPP5K|HIST1H3I|HIST1H3D|BBS2|ABCA1|CREBBP|JUN|SETDB1|GADD45A|NCAPH2|RCC2|SETDB2|FHDC1|SMARCA2|ZWINT|SMARCA4|PPP5C|…
6139	nucleobase, nucleoside, nucleotide and nucleic acid metabolic process	2.32e-17	POP5|PANK2|SMARCB1|ATP5C1|NUDT5|EPRS|LSM10|RPS14|SNRPD2|RPS19|ALKBH1|ARL6IP4|SNRPD3|JUNB|ATP6V0E1|TINF2|CIRBP|NSMCE1|CSNK1D|IMP4|CSNK1E|MED4|MIF4GD|KARS|DDX39B|RRAGC|DDIT3|KCTD13|TBPL1|CD2BP2|TARS2|ASF1A|TSTA3|DHX8|PRKDC|SHMT1|XPA|BAZ2A|XPC|ATP5I|RTF1|PRPSAP1|CHTF8|FIGNL1|HLTF|SYMPK|RBM10|CDT1|APOBEC3F|APOBEC3G|GADD45A|XRCC3|NFATC3|SNUPN|WDR55|ALDH6A1|PPP5C|QARS|FUBP3|TDP2|HNRNPF|PPT1|INTS4|HNRNP…
9987	cellular process	4.638e-16	POP5|UXS1|ATP5C1|EHMT1|F11R|LSM10|PSMD8|PREX1|PSMD4|AKT2|ALKBH1|AKT1|PRKACA|GABARAPL2|PRKAB2|CXADR|CSNK2A2|RFX3|ISL1|SCAMP3|SND1|EID1|DDX39B|MTHFD2|DDIT3|RUFY3|UQCRC1|TBPL1|ATF3|OPTN|NGEF|ATF4|TSTA3|MTMR3|AASDH|SHMT2|ABCB7|CDCA5|SHMT1|BAZ2A|MRPL14|ZNF24|OAZ1|C12ORF65|PRPSAP1|DYNC2LI1|RHOT1|EPB41L2|FIGNL1|PRKAR2A|AFMID|MYO6|PIP5K1A|LTA4H|EXPH5|ABCA1|GSTM3|CREBBP|JUN|CADM4|PMM1|EIF2AK1|NCAPH2|MRPL2…
6807	nitrogen compound metabolic process	5.8214e-16	POP5|ATP5C1|EPRS|LSM10|ALKBH1|AKT1|JUNB|MED4|DDX39B|MTHFD2|DDIT3|TBPL1|TARS2|ASF1A|ATF4|TSTA3|SHMT2|PRKDC|SHMT1|XPA|BAZ2A|XPC|OAZ1|PRPSAP1|FIGNL1|AFMID|HMOX2|EIF2AK1|NFATC3|SNUPN|WDR55|PPP5C|QARS|TDP2|HNRNPF|PPT1|HNRNPC|ADA|BTG2|ASH2L|ING5|CHAF1A|RFK|TK2|HELLS|RMI2|ARG2|DFFA|CNOT6L|TPI1|RMI1|TERF2|SIRT1|WDR33|MRPL44|DDB1|RNF168|SLC7A5|KAT2A|IVD|MED20|ADSSL1|MOCS1|TRUB2|SF3B5|XRCC6BP1|ATP5A1|RPL11…
43170	macromolecule metabolic process	1.0353e-15	POP5|RPL3|OSGEPL1|RPL32|RPL31|EHMT1|EPRS|DCAF7|LSM10|PSMD8|NUB1|RNF115|PSMD4|AKT2|ALKBH1|AKT1|PLCE1|RPL35|PRKACA|JUNB|PRKCI|PRKCD|CSNK2A2|MED4|CLPX|DDX39B|WDR82|DDIT3|CLPP|UQCRC1|TBPL1|RPL24|YME1L1|TARS2|RPL27|PRKD1|ASF1A|MTMR3|ANAPC16|CTBP1|PRKDC|HSPA4L|XPA|BAZ2A|XPC|MRPL14|PRKCZ|C12ORF65|PTPMT1|LTA4H|ST3GAL3|ABCA1|CREBBP|EIF2AK1|PLK2|NFATC3|MRPL28|EIF2AK4|MRPL21|SNUPN|WDR55|MRPL22|MRPL30|PPP5C|…
16043	cellular component organization	9.529e-15	CYFIP1|EHMT1|EPRS|PREX1|AKT1|AP1S1|PLCE1|PRKACA|TSPYL2|PRKCI|CXADR|PIH1D1|MED4|NISCH|DAAM1|DDX39B|WDR82|TBPL1|RPL24|OPTN|ASF1A|ANAPC16|PRKDC|CDCA5|SHMT1|BAZ2A|PRKCZ|C12ORF65|GJC1|DYNC2LI1|PRDX3|BLOC1S1|EPB41L2|PRKAR2A|MYO6|ABCA1|CREBBP|JUN|ABCA5|NCAPH2|FHDC1|SNUPN|PPP5C|EHD4|NPLOC4|QARS|H2AFY2|PPT1|PRKAG1|CLTA|ASH2L|FMN2|LYST|MRC2|ING5|CHAF1A|TRIM4|TK2|HELLS|DFFA|EPS15L1|TERF2|SIRT1|SIRT2|CIT|RNF…
90304	nucleic acid metabolic process	1.0487e-14	POP5|SMARCB1|EPRS|LSM10|RPS14|SNRPD2|RPS19|ALKBH1|ARL6IP4|SNRPD3|JUNB|TINF2|CIRBP|NSMCE1|CSNK1D|IMP4|CSNK1E|MED4|MIF4GD|KARS|DDX39B|RRAGC|DDIT3|KCTD13|TBPL1|CD2BP2|TARS2|ASF1A|DHX8|PRKDC|XPA|BAZ2A|XPC|RTF1|CHTF8|HLTF|SYMPK|RBM10|CDT1|APOBEC3F|APOBEC3G|GADD45A|XRCC3|NFATC3|SNUPN|WDR55|PPP5C|QARS|FUBP3|TDP2|HNRNPF|PPT1|INTS4|HNRNPC|AARS|RPAIN|BTG2|FEN1|INTS10|ASH2L|ING5|CHAF1A|PCF11|TK2|HELLS|PRMT5…
44249	cellular biosynthetic process	1.2686e-14	EIF4A2|PANK2|RPL3|CMAS|RPL32|RPL31|ATP5C1|EPRS|ENO2|NFU1|RPS14|RPL18A|RPS19|RPS18|AKT1|PLCE1|RPL35|RPS11|RPS10|JUNB|PRKAB2|ATP6V0E1|MRPS18A|MIF|MED4|KARS|RRAGC|MTHFD2|DDIT3|KCTD13|TBPL1|RPL24|TARS2|RPL27|ATF3|PI4K2A|ATF4|TSTA3|SHMT1|MGST2|MRPL14|ATP5I|RTF1|LIAS|OAZ1|C12ORF65|PRPSAP1|CHTF8|HLTF|PIP5K1A|LTA4H|ST3GAL3|ABCA1|CDT1|APOBEC3F|APOBEC3G|PMM1|EIF2AK1|NFATC3|MRPL28|MCAT|MRPL21|MRPL22|MRPL30|…
44267	cellular protein metabolic process	4.324e-13	EIF4A2|RPL3|RPL32|RPL31|EHMT1|UBE2L6|EPRS|DCAF7|HERC5|PSMD8|RPS14|RPS6KA6|NUB1|RNF115|CDC23|TRIM28|RPL18A|RPS19|PSMD4|RPS18|AKT2|RPS6KA1|AKT1|KAT8|PLCE1|RPL35|PRKACA|FBXO8|RPS11|ATXN7L3|RPS10|SIL1|PDK2|HERC6|TRIM23|SEC63|PRKCI|PRKCD|CSNK2A2|MRPS18A|CSNK1D|CSNK1E|MAPK8IP3|CLPX|KARS|WDR82|KCTD13|RPL24|TARS2|ULK1|RPL27|TRIM16|PRKD1|TTLL12|MTMR3|ANAPC16|CTBP1|PRKDC|HSPA4L|BAZ2A|MRPL14|RTF1|UBE2J2|PRK…
9058	biosynthetic process	5.5369e-13	EIF4A2|PANK2|RPL3|CMAS|RPL32|RPL31|ATP5C1|EPRS|ENO2|NFU1|RPS14|RPL18A|RPS19|RPS18|AKT1|PLCE1|RPL35|RPS11|RPS10|JUNB|PRKAB2|ATP6V0E1|MRPS18A|MIF|MED4|KARS|RRAGC|MTHFD2|DDIT3|KCTD13|TBPL1|RPL24|TARS2|RPL27|ATF3|PI4K2A|ATF4|TSTA3|SHMT1|MGST2|MRPL14|ATP5I|RTF1|LIAS|OAZ1|C12ORF65|PRPSAP1|CHTF8|HLTF|PIP5K1A|LTA4H|ST3GAL3|ABCA1|CDT1|APOBEC3F|APOBEC3G|PMM1|EIF2AK1|NFATC3|MRPL28|MCAT|MRPL21|MRPL22|MRPL30|…
6412	translation	1.5772e-11	EIF4A2|MRPS16|RPL3|RPL32|GFM2|RPL31|MRPS11|RPLP0|EPRS|RPL10A|MRPL34|EEF1B2|RPS4X|MRPL41|RPS14|RPL7A|RPL18A|RPS19|RPS18|RPL35|MRPL9|RPS11|RPS10|LRRC47|RPS9|WARS|RPS8|PABPC4|RPS5|DHPS|MRPL49|SARS|MRPS18A|RPL9P7|MRPS7|TUFM|EEF1G|DALRD3|POLG2|KARS|EEF1D|RPL24|TARS2|RPL27|MRPS36|RPL12|RPL11|MRPL14|RRBP1|EGFR|C12ORF65|PDF|ICT1|RPL13|HARS|RPS2|EIF4B|RPL19|YARS|EIF2B3|EIF2AK1|MRPL28|RPL35A|EEF2|MRPL21|MR…
16568	chromatin modification	2.4886e-11	SMARCB1|KDM1A|KDM1B|JADE1|EHMT1|ASH2L|ARRB1|CHD4|TTF1|ING5|HMGN5|VPS72|H2AFJ|GSG2|RUVBL2|DNMT3B|KAT8|HMG20B|HMG20A|KMT5A|WHSC1|PRKACA|ATXN7L3|HMGN3|CPA3|TSPYL2|HELLS|PRMT5|SMARCC1|SMARCC2|KDM2B|H2AFY|USP3|TERF2|SIRT1|SIRT2|MSL1|RNF168|KAT2B|KAT2A|WDR82|KAT6A|TRIM16|ASF1A|DNMT1|SMARCD2|HDAC1|RNF8|CXXC1|BAZ2A|RTF1|HDAC6|TAF5L|PAK1|RBBP4|RBBP5|HLTF|UBN1|SMYD3|DMAP1|SUDS3|CPA4|MBD3|SUZ12|CREBBP|CENPV…
10467	gene expression	3.4646e-11	EIF4A2|POP5|RPL3|RPL32|RPL31|EPRS|LSM10|RPS14|SNRPD2|RPL18A|RPS19|RPS18|RPL35|ARL6IP4|SNRPD3|RPS11|RPS10|MRPS18A|IMP4|MED4|KARS|DDX39B|RRAGC|DDIT3|TBPL1|CD2BP2|RPL24|TARS2|RPL27|DHX8|MRPL14|RTF1|C12ORF65|HLTF|SYMPK|RBM10|APOBEC3F|APOBEC3G|EIF2AK1|NFATC3|MRPL28|MRPL21|SNUPN|WDR55|MRPL22|MRPL30|PPP5C|QARS|FUBP3|RPS29|HNRNPF|RPL27A|INTS4|HNRNPC|AARS|MRPS16|GFM2|MRPS11|RPLP0|INTS10|ASH2L|MRPL34|MRPL4…
6325	chromatin organization	6.558e-11	SMARCB1|KDM1A|KDM1B|JADE1|EHMT1|ARID4A|TTF1|HMGN5|RUVBL2|KAT8|KMT5A|PRKACA|ATXN7L3|HMGN3|CPA3|TSPYL2|SMARCC1|SMARCC2|KDM2B|USP3|CDYL|WDR82|KAT6A|TRIM16|ASF1A|DNMT1|BAZ2A|RTF1|TAF5L|HLTF|H1FX|SMYD3|HIST1H3I|DMAP1|SUDS3|HIST1H3D|CPA4|CREBBP|CBX6|SETDB1|CBX4|SETDB2|CBX1|SUPT5H|SMARCA2|SMARCA4|H1F0|H2AFY2|FAM175A|TADA3|TADA1|HIST1H4I|TCF3|HIST1H4C|RCOR1|MAP3K12|ASH2L|ARRB1|CHD4|CHD2|ING5|CHAF1A|VPS72…
34645	cellular macromolecule biosynthetic process	7.5569e-11	EIF4A2|RPL3|CMAS|RPL32|RPL31|EPRS|RPS14|RPL18A|RPS19|RPS18|RPL35|RPS11|RPS10|JUNB|MRPS18A|MED4|KARS|RRAGC|DDIT3|KCTD13|TBPL1|RPL24|TARS2|RPL27|MRPL14|RTF1|C12ORF65|CHTF8|HLTF|ST3GAL3|ABCA1|CDT1|APOBEC3F|APOBEC3G|EIF2AK1|NFATC3|MRPL28|MRPL21|MRPL22|MRPL30|PPP5C|QARS|FUBP3|RPS29|RPL27A|NMT2|AARS|RPAIN|FEN1|MRPS16|GFM2|MRPS11|PIGP|RPLP0|ASH2L|MRPL34|PIGX|MRPL41|ING5|CHAF1A|SERP1|TK2|NANS|LRRC47|RMI2…
51276	chromosome organization	1.4758e-10	SMARCB1|KDM1A|KDM1B|JADE1|EHMT1|ARID4A|TTF1|CDC23|HMGN5|RUVBL2|NUSAP1|KAT8|KMT5A|PRKACA|ATXN7L3|HMGN3|CPA3|TSPYL2|SMARCC1|SMARCC2|KDM2B|USP3|TINF2|CDYL|WDR82|KAT6A|TRIM16|ASF1A|DNMT1|PRKDC|CDCA5|BAZ2A|RTF1|TAF5L|HLTF|H1FX|SMYD3|HIST1H3I|DMAP1|SUDS3|HIST1H3D|CPA4|CREBBP|CBX6|SETDB1|CBX4|NCAPH2|SETDB2|CBX1|SUPT5H|SMARCA2|ZWINT|SMARCA4|H1F0|H2AFY2|FAM175A|TADA3|CDK1|TADA1|HIST1H4I|TCF3|HIST1H4C|RCOR…
9059	macromolecule biosynthetic process	5.0154e-10	EIF4A2|RPL3|CMAS|RPL32|RPL31|EPRS|RPS14|RPL18A|RPS19|RPS18|RPL35|RPS11|RPS10|JUNB|MRPS18A|MED4|KARS|RRAGC|DDIT3|KCTD13|TBPL1|RPL24|TARS2|RPL27|MRPL14|RTF1|C12ORF65|CHTF8|HLTF|ST3GAL3|ABCA1|CDT1|APOBEC3F|APOBEC3G|EIF2AK1|NFATC3|MRPL28|MRPL21|MRPL22|MRPL30|PPP5C|QARS|FUBP3|RPS29|RPL27A|NMT2|AARS|RPAIN|FEN1|MRPS16|GFM2|MRPS11|PIGP|RPLP0|ASH2L|MRPL34|PIGX|MRPL41|ING5|CHAF1A|SERP1|TK2|NANS|LRRC47|RMI2…
6259	DNA metabolic process	7.7449e-09	SMARCB1|KDM1B|CDC14B|EME1|ALKBH1|RUVBL2|PIM1|JUNB|FBXO18|SWAP70|USP3|TINF2|NSMCE1|CSNK1D|WRNIP1|CSNK1E|CDC25C|RBX1|POLG2|KCTD13|ASF1A|DNMT1|RNASEH2A|PRKDC|XPA|BAZ2A|XPC|CHTF8|ORC1|DMAP1|FANCI|UVRAG|CDT1|FANCM|GADD45A|XRCC3|FANCA|FANCC|CDK7|TDP2|FAM175A|CDK2|JMY|PPT1|TCF3|RPAIN|BTG2|FEN1|MCM10|TNFAIP1|ING5|CHAF1A|EXO1|TOP1MT|DNMT3B|TK2|POLL|POLE|POLH|HELLS|RMI2|DFFA|RFC1|PARP1|RMI1|RFC2|PARP2|TOP3…
6091	generation of precursor metabolites and energy	4.1191e-08	PYGB|NDUFA13|ACADVL|NDUFA11|COX4I1|NDUFA10|ATP5C1|ETFA|ETFB|COX6A1|ATP5G2|ENO2|COX7C|HK1|DHTKD1|PPP1CC|LEPR|GYG2|FADS1|COX8A|ATP6V0B|TPI1|ATP6V0E1|GLRX2|SDHA|ISL1|SDHB|OXA1L|NDUFS8|SDHAF2|NDUFS7|CAT|NDUFS4|ATP6V1B2|UQCRC1|SUCLG2|NDUFS2|NDUFS1|ALDOC|STEAP2|PPARD|FH|FRRS1|COX15|NDUFB11|NDUFB5|ATP5A1|ETFDH|DLST|NDUFB1|ATP5I|PDHB|UQCRH|SLC25A27|NDUFV1|ATP6V1D|ATP6V1F|CYB5A|NDUFA8|NDUFA7|SURF1|PDHA1|I…
19538	protein metabolic process	4.1781e-08	RPL3|OSGEPL1|RPL32|RPL31|EHMT1|EPRS|DCAF7|PSMD8|NUB1|RNF115|PSMD4|AKT2|AKT1|PLCE1|RPL35|PRKACA|PRKCI|PRKCD|CSNK2A2|CLPX|WDR82|CLPP|UQCRC1|RPL24|YME1L1|TARS2|RPL27|PRKD1|MTMR3|ANAPC16|CTBP1|PRKDC|HSPA4L|BAZ2A|MRPL14|PRKCZ|C12ORF65|PTPMT1|LTA4H|ST3GAL3|ABCA1|CREBBP|EIF2AK1|PLK2|MRPL28|EIF2AK4|MRPL21|MRPL22|MRPL30|PPP5C|NPLOC4|QARS|PPT1|NMT2|DZIP3|RNF220|CDK16|BTG2|CDKN1A|PIGP|RPLP0|PRKAG1|ASH2L|MRP…
51186	cofactor metabolic process	6.0029e-08	PANK2|ALAS1|HIBADH|MTR|ALDH1L2|NFU1|MCEE|UROD|FPGS|DBT|ME1|TMEM14C|CBR1|TPI1|GPX1|GPX4|DCAKD|GLRX2|SDHA|PGD|SDHB|MTHFD2|CAT|SUCLG2|BLVRB|ACOT1|HAGH|MOCS1|BLVRA|ISCU|GLYR1|PDXK|FH|H6PD|COX15|SHMT1|IREB2|DLST|MGST2|PDHB|LIAS|MTHFSD|HMGCL|NADK|HMOX2|CBR3|GCH1|TPK1|EIF2AK1|IDH1|GSR|IDH2|COQ7|ACADSB|COQ5|COQ3|PPT1
6414	translational elongation	3.9202e-07	RPL3|RPL32|RPL31|RPL12|RPLP0|RPL11|RPL10A|EEF1B2|RPS4X|RPS14|RPL7A|RPL18A|RPS19|RPS18|RPL35|RPL13|RPS2|RPS11|RPS10|RPL19|RPS9|RPS8|RPS5|RPL35A|RPL9P7|EEF2|TUFM|EEF1G|EEF1D|RPS29|RPL27A|RPL24|RPL27|FAU
16569	covalent chromatin modification	5.6083e-07	KDM1A|HDAC1|KDM1B|RNF8|CXXC1|JADE1|EHMT1|BAZ2A|ASH2L|ARRB1|RTF1|HDAC6|TAF5L|ING5|PAK1|RBBP5|RUVBL2|DNMT3B|KAT8|DMAP1|PRKACA|ATXN7L3|CPA4|MBD3|CPA3|SUZ12|HELLS|PRMT5|CREBBP|TAF12|USP3|HUWE1|SIRT1|SIRT2|RNF168|KAT2B|KAT2A|WDR82|KAT6A|TADA3|TADA1|TRIM16|SMAP2|MAP3K12
44281	small molecule metabolic process	6.79e-07	PANK2|AHCYL1|ATP5C1|EHMT1|NUDT5|EPRS|ENO2|ALKBH1|PLCE1|PDK2|MCCC2|PRKAB2|ATP6V0E1|ACSL1|MIF|KARS|MTHFD2|WDR82|TBPL1|ACOT1|TARS2|ATF3|ATF4|TSTA3|AASDH|SHMT2|SHMT1|MGST2|BAZ2A|ATP5I|LIAS|OAZ1|PRPSAP1|SGPL1|FIGNL1|AFMID|SCAP|LTA4H|ABCA1|PMM1|MCAT|ACADSB|ALDH6A1|QARS|FASN|ADA|AARS|PYGB|BTG2|HIBADH|PRKAG1|ASH2L|NANP|SPTLC2|GUK1|RFK|PHGDH|TK2|AASS|SREBF1|HELLS|CBR1|PRMT5|ARG2|ATP6V0B|TPI1|WARS|ELOVL4|P…
44085	cellular component biogenesis	1.0547e-06	CYFIP1|TTF1|EPRS|TOMM22|RPS14|PREX1|FBL|TUBB6|BAIAP2L1|OPHN1|SNRPD2|RPS19|PIM1|SNRPD3|TXNL4A|TSPYL2|DIMT1|COG4|PIH1D1|TINF2|ATG9A|CIRBP|ACOT13|IMP4|TSC1|ACTN4|MIF|MED4|GTF2F1|FTSJ3|OXA1L|PRPF6|DDX39B|KAT6A|KCTD13|TBPL1|CD2BP2|RPL24|SNRPC|SNRNP200|EZR|ASF1A|LLGL1|SNRPB|CD151|COX15|SHMT1|COX18|LIN7A|ITPR3|RTF1|PRKCZ|UQCRH|GTF2E2|GJC1|MED30|PRKAR2A|MYO6|H1FX|HIST1H3I|HIST1H3D|BBS2|ABCA1|CREBBP|SURF1…
33554	cellular response to stress	1.9365e-06	CDC14B|EME1|ALKBH1|RUVBL2|PIM1|FADS1|FBXO18|USP3|ATG9A|NSMCE1|CSNK1D|WRNIP1|CSNK1E|MAPK8IP3|RBX1|POLG2|DDIT3|TIMELESS|ASF1A|ATF4|PRKDC|XPA|XPC|PRDX3|NUAK2|MYO6|SCAP|KIAA1804|FANCI|UVRAG|TRAP1|JUN|EIF2B3|FANCM|GADD45A|EIF2AK1|XRCC3|FANCA|ASNS|FANCC|EIF2AK4|COQ7|DAP|CDK7|TDP2|FAM175A|JMY|CDK1|MAP3K12|RPAIN|BTG2|CDKN1A|FEN1|MRPS11|DUSP19|CTSV|TRIAP1|CHAF1A|EXO1|POLL|POLE|POLH|SREBF1|MRPS26|GPX1|RFC1…
6732	coenzyme metabolic process	2.3499e-06	PANK2|PDXK|FH|H6PD|HIBADH|SHMT1|DLST|MGST2|MTR|PDHB|LIAS|ALDH1L2|MTHFSD|HMGCL|MCEE|FPGS|DBT|ME1|NADK|CBR3|TPI1|GPX1|GCH1|GPX4|TPK1|DCAKD|IDH1|GSR|IDH2|GLRX2|SDHA|PGD|SDHB|COQ7|ACADSB|COQ5|COQ3|MTHFD2|CAT|SUCLG2|ACOT1|HAGH|MOCS1|GLYR1
16570	histone modification	2.4818e-06	KDM1A|HDAC1|KDM1B|RNF8|CXXC1|JADE1|EHMT1|BAZ2A|ASH2L|ARRB1|RTF1|HDAC6|TAF5L|ING5|PAK1|RBBP5|RUVBL2|KAT8|DMAP1|PRKACA|ATXN7L3|CPA4|MBD3|CPA3|SUZ12|PRMT5|CREBBP|TAF12|USP3|HUWE1|SIRT1|SIRT2|RNF168|KAT2B|KAT2A|WDR82|KAT6A|TADA3|TADA1|TRIM16|SMAP2|MAP3K12
43687	post-translational protein modification	3.0829e-06	EHMT1|UBE2L6|DCAF7|RPS6KA6|NUB1|RNF115|CDC23|TRIM28|RPS6KA1|AKT1|KAT8|PLCE1|PRKACA|ATXN7L3|PDK2|TRIM23|PRKCI|PRKCD|CSNK2A2|CSNK1D|CSNK1E|MAPK8IP3|WDR82|KCTD13|ULK1|TRIM16|PRKD1|MTMR3|ANAPC16|CTBP1|PRKDC|BAZ2A|RTF1|UBE2J2|PRKCZ|NUAK2|PTPMT1|KIAA1804|CREBBP|EIF2AK1|PLK2|EIF2AK4|PPP5C|NMT2|DZIP3|RNF220|CDK16|BTG2|CDKN1A|PTPRQ|PRKAG1|ASH2L|IKBKAP|PTPRF|PPP3CA|ING5|GSG2|DUSP5|PRMT5|ANXA1|PARP1|PRMT2|P…
6281	DNA repair	3.971e-06	RPAIN|BTG2|FEN1|CDC14B|CHAF1A|EME1|EXO1|ALKBH1|RUVBL2|POLL|POLE|POLH|FBXO18|RFC1|PARP1|RFC2|PARP2|USP3|NSMCE1|CSNK1D|RAD23A|WRNIP1|CSNK1E|KIF22|SMC1A|SENP2|SIRT1|WDR33|RBX1|DDB1|RNF168|RRM2B|POLG2|ASF1A|XRCC6BP1|UHRF1|PRKDC|USP10|RNF8|XPA|XPC|SLX4|RECQL5|POLD2|RAD54L|ZSWIM7|PMS1|FANCI|UVRAG|FANCM|GADD45A|XRCC3|FANCA|RPA1|RPA2|FANCC|GTF2H3|APTX|GTF2H5|SMUG1|CDK7|RAD51|ERCC3|TDP2|ERCC2|FAM175A|JMY|…
10468	regulation of gene expression	4.9804e-06	ZNF174|EHMT1|AKT2|ALKBH1|ZXDC|HOXA3|AKT1|ADNP2|PRKACA|JUNB|ZNF287|TSPYL2|ZNF284|ZNF283|PRKCD|MED8|RFX3|HCFC2|MED4|ISL1|ZNF14|SND1|DKK3|EID1|DDIT3|ZSCAN21|RFX5|TBPL1|ATF3|ASF1A|ATF4|ZNF277|ZNF28|ZBTB8A|CTBP1|PRKDC|ZNF391|SHOX2|CDCA7|BAZ2A|ZNF24|ZNF25|PRDX3|MYO6|ZSCAN12|ZNF266|HEXIM1|CREBBP|JUN|NDFIP2|ZNF142|JUND|ZNF382|ZNF140|EIF2AK1|NFATC3|PBX2|MRPL28|NR1D2|EIF2AK4|TADA2B|H2AFY2|HNRNPF|GTF2IRD1|Z…
65003	macromolecular complex assembly	5.8023e-06	TTF1|EPRS|TOMM22|RPS14|PREX1|TUBB6|SNRPD2|PIM1|SNRPD3|TXNL4A|TSPYL2|COG4|PIH1D1|CIRBP|ACOT13|TSC1|MIF|MED4|GTF2F1|OXA1L|PRPF6|DDX39B|KAT6A|TBPL1|CD2BP2|RPL24|SNRPC|SNRNP200|ASF1A|LLGL1|SNRPB|COX15|SHMT1|COX18|LIN7A|ITPR3|RTF1|PRKCZ|UQCRH|GTF2E2|MED30|PRKAR2A|H1FX|HIST1H3I|HIST1H3D|ABCA1|CREBBP|SURF1|FANCA|FANCC|SNUPN|H1F0|PPP5C|CDK7|OCLN|QARS|H2AFY2|CDK5|UBE2S|DLG4|CDK1|GRB2|MDM4|HIST1H4I|NDUFAF1…
16070	RNA metabolic process	6.3043e-06	POP5|PDCD7|ARID4A|TTF1|EPRS|RPL10A|THG1L|LSM10|EFTUD2|RPS14|FBL|SNRPD2|RPS19|ALKBH1|SNIP1|ARL6IP4|CIR1|SNRPD3|SNRNP35|TXNL4A|JUNB|SNRPN|DIMT1|CIRBP|SSU72|SARS|IMP4|MED4|GTF2F1|MIF4GD|FTSJ3|PRPF4|PRPF6|POLG2|KARS|DDX39B|RRAGC|DDIT3|RPP21|TBPL1|CD2BP2|TARS2|PPIG|SNRPC|SNRNP200|SNRPA|SNRPB|KHDRBS1|RNASEH2A|DHX8|CNP|RBM8A|RTF1|PRPF8|TAF5L|GTF2E2|MED30|DVL2|SYMPK|RBM10|YARS|APOBEC3F|APOBEC3G|CPSF1|NFA…
22607	cellular component assembly	7.9711e-06	CYFIP1|TTF1|EPRS|TOMM22|RPS14|PREX1|TUBB6|BAIAP2L1|OPHN1|SNRPD2|PIM1|SNRPD3|TXNL4A|TSPYL2|COG4|PIH1D1|TINF2|ATG9A|CIRBP|ACOT13|TSC1|ACTN4|MIF|MED4|GTF2F1|OXA1L|PRPF6|DDX39B|KAT6A|KCTD13|TBPL1|CD2BP2|RPL24|SNRPC|SNRNP200|EZR|ASF1A|LLGL1|SNRPB|CD151|COX15|SHMT1|COX18|LIN7A|ITPR3|RTF1|PRKCZ|UQCRH|GTF2E2|GJC1|MED30|PRKAR2A|MYO6|H1FX|HIST1H3I|HIST1H3D|BBS2|ABCA1|CREBBP|SURF1|FANCA|FANCC|SNUPN|H1F0|PPP…
43933	macromolecular complex subunit organization	1.039e-05	TTF1|EPRS|TOMM22|RPS14|PREX1|TUBB6|SNRPD2|PIM1|SNRPD3|TXNL4A|TSPYL2|COG4|PIH1D1|CIRBP|ACOT13|TSC1|MIF|MED4|GTF2F1|OXA1L|PRPF6|DDX39B|KAT6A|TBPL1|CD2BP2|RPL24|SNRPC|SNRNP200|ASF1A|LLGL1|SNRPB|COX15|SHMT1|COX18|LIN7A|ITPR3|RTF1|PRKCZ|UQCRH|GTF2E2|C12ORF65|MED30|PRKAR2A|H1FX|HIST1H3I|HIST1H3D|ABCA1|CREBBP|SURF1|ABCA5|FANCA|FANCC|SNUPN|H1F0|PPP5C|CDK7|OCLN|QARS|H2AFY2|CDK5|UBE2S|DLG4|CDK1|GRB2|MDM4|H…
278	mitotic cell cycle	1.0848e-05	CDKN1A|KIF11|KIF15|LSM10|PSMD8|PPP3CA|CDC23|PSMD4|PIM1|NUSAP1|AKT1|KMT5A|NEK3|TXNL4A|SKP2|POLE|HELLS|DYNLT1|USP3|HAUS4|KIF22|CDC25C|SMC1A|CKAP5|SIRT2|CDC25B|CIT|DNM2|TUBB2B|CLIP1|PSRC1|LATS2|INCENP|KIFC1|TIMELESS|BIRC5|RPL24|ANAPC5|KIF2C|MAPRE3|ARHGEF2|KHDRBS1|ANAPC16|CDCA5|MIS12|RNF8|KATNB1|PPM1D|EGFR|PSMB6|DSN1|PSMB5|HAUS7|CLTCL1|E2F1|NUP43|NEK9|DYNC1H1|CENPV|NEK4|SPAG5|GADD45A|PLK2|RCC2|NDE1|M…
6974	response to DNA damage stimulus	1.2631e-05	RPAIN|BTG2|CDKN1A|FEN1|MRPS11|TRIAP1|CDC14B|CHAF1A|EME1|EXO1|ALKBH1|RUVBL2|POLL|POLE|POLH|MRPS26|FBXO18|RFC1|PARP1|RFC2|PARP2|USP3|NSMCE1|CSNK1D|RAD23A|WRNIP1|CSNK1E|KIF22|SMC1A|SENP2|TERF2|SIRT1|WDR33|RBX1|DDB1|RNF168|RRM2B|POLG2|DDIT3|TIMELESS|TERF2IP|ASF1A|MCM2|XRCC6BP1|UHRF1|PRKDC|USP10|RNF8|XPA|XPC|SLX4|RECQL5|POLD2|MYO6|MAPK1|RAD54L|ZSWIM7|PMS1|FANCI|UVRAG|FANCM|GADD45A|XRCC3|FANCA|RPA1|RPA…
43412	macromolecule modification	2.26e-05	EHMT1|UBE2L6|DCAF7|HERC5|RPS6KA6|NUB1|RNF115|CDC23|TRIM28|AKT2|ALKBH1|RPS6KA1|AKT1|KAT8|PLCE1|PRKACA|ATXN7L3|PDK2|HERC6|TRIM23|PRKCI|PRKCD|CSNK2A2|CSNK1D|CSNK1E|MAPK8IP3|WDR82|KCTD13|ULK1|TRIM16|PRKD1|TTLL12|MTMR3|ANAPC16|CTBP1|PRKDC|BAZ2A|RTF1|UBE2J2|PRKCZ|NUAK2|PTPMT1|KIAA1804|ST3GAL3|ABCA1|CREBBP|APOBEC3F|APOBEC3G|EIF2AK1|PLK2|EIF2AK4|PPP5C|PPT1|NMT2|DZIP3|RNF220|CDK16|BTG2|CDKN1A|PTPRQ|PIGP|P…
60255	regulation of macromolecule metabolic process	3.1406e-05	ZNF174|EHMT1|PSMD8|PSMD4|AKT2|ALKBH1|ZXDC|HOXA3|AKT1|ADNP2|PRKACA|JUNB|ZNF287|TSPYL2|ZNF284|ZNF283|PRKCD|MED8|RFX3|HCFC2|MED4|ISL1|ZNF14|SND1|DKK3|EID1|DDIT3|ZSCAN21|RFX5|TBPL1|ATF3|ASF1A|ATF4|ZNF277|ZNF28|ZBTB8A|CTBP1|PRKDC|ZNF391|SHOX2|CDCA7|BAZ2A|ZNF24|ZNF25|PRKCZ|PRDX3|PRKAR2A|MYO6|ZSCAN12|ZNF266|HEXIM1|CREBBP|JUN|NDFIP2|ZNF142|JUND|ZNF382|ZNF140|EIF2AK1|NFATC3|PBX2|MRPL28|NR1D2|EIF2AK4|TADA2…
45333	cellular respiration	3.6953e-05	FH|COX15|NDUFB5|NDUFA10|DLST|NDUFB1|PDHB|UQCRH|NDUFV1|NDUFA8|NDUFA7|SURF1|IDH1|IDH2|NDUFA2|NFATC3|SDHA|SDHB|COQ7|OXA1L|NDUFS8|SDHAF2|NDUFS7|CAT|NDUFS4|UQCRC1|SUCLG2|NDUFS2|NDUFS1|NDUFAF1
46907	intracellular transport	5.1259e-05	NDUFA13|ATP5C1|TOMM20|TOMM22|GOLGA3|KPNA6|AKT1|AP1S1|SIL1|SEC63|GABARAPL2|PRKCI|TRAPPC2L|COG4|AP1B1|AIP|IMP4|TSC1|SCAMP3|DDX39B|HGS|CDC37|RAB35|ERP29|STEAP2|OPTN|COPA|ATP5I|PRKCZ|SYNGR1|RHOT1|ORC1|KIF3B|BLOC1S1|MYO6|CLTCL1|SNX9|RAB6B|TXNDC5|EXPH5|TRAPPC2|ABCA1|TRAPPC3|JUN|SNAPIN|ANKRD27|TRAPPC4|M6PR|AP4B1|SNUPN|APPBP2|CDK5|KIF4A|RPAIN|SLC25A1|CLTB|CLTA|ARRB1|AP2A1|LYST|AP2A2|DUSP16|HK1|PPP3CA|SEC…
16192	vesicle-mediated transport	5.1259e-05	GOLGA3|OPHN1|AP1S1|SH3GL1|UNC13B|NSF|GABARAPL2|PRKCI|TRAPPC2L|COG4|VPS33B|AP1B1|MAPK8IP3|SCAMP3|HGS|RAB35|ULK1|KDELR3|KIF20A|STEAP2|OPTN|PI4K2A|LLGL1|COPA|STXBP1|LIN7A|ARHGAP17|PLD2|SNX3|BLOC1S1|MYO6|CLTCL1|S100A13|STXBP6|RAB6B|TXNDC5|TRAPPC2|ABCA1|TRAPPC3|SNAPIN|ANKRD27|TRAPPC4|M6PR|AP4B1|IGF2R|MARCH2|EHD4|CDK5|DLG4|PPT1|GRB2|PI4KB|USP33|CLTB|CLTA|ARRB1|AP2A1|ARRB2|LYST|AP2A2|HK1|GHR|MRC2|SCRN1|…
51641	cellular localization	5.2894e-05	NDUFA13|ATP5C1|TOMM20|TOMM22|GOLGA3|CDC23|KPNA6|NUSAP1|AKT1|AP1S1|SIL1|SEC63|UNC13B|GABARAPL2|PRKCI|TRAPPC2L|USP4|COG4|TINF2|VPS33B|AP1B1|AIP|IMP4|TSC1|SCAMP3|OXA1L|DDX39B|HGS|CDC37|RAB35|ERP29|KDELR3|EZR|STEAP2|OPTN|PI4K2A|LLGL1|COPA|CDCA5|COX18|STXBP1|LTBP4|LIN7A|ATP5I|ARHGAP17|PRKCZ|SYNGR1|RHOT1|ORC1|KIF3B|BLOC1S1|MYO6|CLTCL1|S100A13|SNX9|RAB6B|TXNDC5|EXPH5|BBS2|TRAPPC2|ABCA1|TRAPPC3|JUN|SNAPI…
51649	establishment of localization in cell	5.2894e-05	NDUFA13|ATP5C1|TOMM20|TOMM22|GOLGA3|CDC23|KPNA6|NUSAP1|AKT1|AP1S1|SIL1|SEC63|UNC13B|GABARAPL2|PRKCI|TRAPPC2L|COG4|VPS33B|AP1B1|AIP|IMP4|TSC1|SCAMP3|DDX39B|HGS|CDC37|RAB35|ERP29|STEAP2|OPTN|PI4K2A|LLGL1|COPA|CDCA5|STXBP1|LTBP4|LIN7A|ATP5I|ARHGAP17|PRKCZ|SYNGR1|RHOT1|ORC1|KIF3B|BLOC1S1|MYO6|CLTCL1|S100A13|SNX9|RAB6B|TXNDC5|EXPH5|BBS2|TRAPPC2|ABCA1|TRAPPC3|JUN|SNAPIN|ANKRD27|TRAPPC4|M6PR|AP4B1|SNUPN…
15980	energy derivation by oxidation of organic compounds	5.2894e-05	PYGB|FH|ACADVL|COX15|NDUFB5|NDUFA10|DLST|NDUFB1|PDHB|UQCRH|PPP1CC|LEPR|GYG2|NDUFV1|NDUFA8|NDUFA7|SURF1|IDH1|GFPT2|IDH2|GFPT1|NDUFA2|NFATC3|SDHA|SDHB|COQ7|OXA1L|NDUFS8|SDHAF2|CPS1|NDUFS7|CAT|NDUFS4|UQCRC1|SUCLG2|NDUFS2|NDUFS1|NDUFAF1|CRAT
9056	catabolic process	5.2894e-05	FBXO27|FBXO21|NUDT5|ENO2|ALDH1L2|PSMD8|NUB1|CDC23|PSMD4|PIM1|AKT1|PLCE1|FBXO8|HADH|JUNB|MCCC2|GABARAPL2|MYLIP|USP7|IAH1|USP4|USP3|USP2|ATG9A|UBE4B|SDHA|PGD|SDHB|CLPX|RBX1|PLA2G16|KCTD13|SUCLG2|YME1L1|ANAPC5|GLYR1|CUL7|TSG101|RNASEH2A|H6PD|CNP|RBM8A|SHMT1|XPA|UBR3|XPC|PLD3|PLD2|PRDX3|SGPL1|AFMID|PLCG1|HMOX2|UBE2H|PDHA1|IDH1|IDH2|ALDH6A1|CDK7|NPLOC4|CPS1|CDK5|UBE2S|PPT1|CDK1|ADA|PYGB|RNF11|FEN1|ACA…
10556	regulation of macromolecule biosynthetic process	6.9318e-05	ZNF174|EHMT1|AKT2|ZXDC|HOXA3|AKT1|ADNP2|PRKACA|JUNB|ZNF287|TSPYL2|ZNF284|ZNF283|MED8|RFX3|HCFC2|MED4|ISL1|ZNF14|SND1|DKK3|EID1|DDIT3|ZSCAN21|RFX5|TBPL1|ATF3|ASF1A|ATF4|ZNF277|ZNF28|ZBTB8A|CTBP1|PRKDC|ZNF391|SHOX2|CDCA7|BAZ2A|ZNF24|ZNF25|PRDX3|MYO6|ZSCAN12|ZNF266|HEXIM1|CREBBP|JUN|ZNF142|JUND|ZNF382|ZNF140|EIF2AK1|NFATC3|PBX2|MRPL28|NR1D2|EIF2AK4|TADA2B|GTF2IRD1|ZNF138|BTG2|RARG|ZNF492|PHF20|ATF7I…
22900	electron transport chain	7.525e-05	NDUFA13|FRRS1|NDUFA11|COX15|NDUFB11|NDUFB5|NDUFA10|ETFDH|NDUFB1|ETFA|ETFB|UQCRH|NDUFV1|FADS1|CYB5A|NDUFA8|NDUFA7|TXNRD1|NDUFA2|CYBRD1|GLRX2|SDHA|SDHB|COQ7|NDUFS8|SDHAF2|NDUFS7|NDUFS4|UQCRC1|NDUFS2|NDUFS1|NDUFAF1|STEAP2
87	M phase of mitotic cell cycle	7.7193e-05	KIF11|KIF15|CDC23|NUSAP1|KMT5A|NEK3|TXNL4A|HELLS|DYNLT1|HAUS4|KIF22|CDC25C|SMC1A|CKAP5|SIRT2|CDC25B|CIT|TUBB2B|CLIP1|PSRC1|LATS2|INCENP|KIFC1|TIMELESS|BIRC5|RPL24|ANAPC5|KIF2C|MAPRE3|ARHGEF2|ANAPC16|CDCA5|MIS12|RNF8|KATNB1|DSN1|HAUS7|CLTCL1|NUP43|NEK9|CENPV|NEK4|SPAG5|RCC2|NDE1|MPP6|ZWINT|KLHL9|MAD2L2|PPP5C|UBE2S|CCNG1|CDK2|CDK1|MAD2L1
8104	protein localization	0.00010612	RAB3B|NDUFA13|NUP188|CD81|TOMM20|TOMM22|PALM|KPNA6|AKT1|AP1S1|SIL1|VPS39|SEC63|NSF|GABARAPL2|CADPS2|PRKCI|NUP210|USP4|COG4|TINF2|VPS33B|ATG9A|AP1B1|AIP|IMP4|ACTN4|MAPK8IP3|SCAMP3|OXA1L|RAB30|HGS|CDC37|RAB35|ERP29|ULK1|KDELR3|KIF20A|EZR|OPTN|COPA|TSG101|RAB5C|COX18|STXBP1|LIN7A|SNX3|SYNGR1|RAB11FIP1|MYO6|CLTCL1|S100A13|SNX9|SNX7|RAB6B|SNX8|SNX5|EXPH5|BBS2|ABCA1|JUN|SNAPIN|AP4B1|SNUPN|APPBP2|CDK5|P…
70727	cellular macromolecule localization	0.00010612	RPAIN|NDUFA13|CLTB|CLTA|AP2A1|AP2A2|DUSP16|TOMM20|TOMM22|PPP3CA|SEC61A1|HHEX|KPNA6|AKT1|AP1S1|SIL1|SEC63|SUN1|PRKCI|SEC13|DYNLT1|USP4|TINF2|AP1B1|AIP|IMP4|ARFGAP3|TERF2|OXA1L|HGS|CDC37|ATG4C|ERP29|TERF2IP|ARHGEF2|KDELR3|OPTN|COPA|SEC23A|STAU1|STX17|STX16|UNC93B1|COX18|TIMM9|RPL11|HTT|KATNB1|TRAK1|EGFR|HDAC6|STX10|GGA2|AP3M2|GGA1|SYNGR1|LMNA|MYO6|CLTCL1|MAPK1|FLNA|STX4|SNX9|STX2|EXPH5|BBS2|TIMM8A|…
7049	cell cycle	0.00010612	SMARCB1|LSM10|PSMD8|PPP1CC|CDC23|PSMD4|PIM1|NUSAP1|AKT1|KMT5A|NEK3|TXNL4A|SKP2|USP3|USP2|CDC25C|CDC25B|EID1|ILF3|CLIP1|DDIT3|SPECC1L|TIMELESS|RPL24|ANAPC5|KHDRBS1|TSG101|ANAPC16|CDCA5|CREBL2|DSN1|CHTF8|CLTCL1|FANCI|NEK9|CDT1|NEK4|GADD45A|PLK2|RCC2|FANCA|SUPT5H|ZWINT|PPP5C|UBE2S|CDK4|CDK2|JMY|CDK1|PIN1|MDM4|TCF3|CDKN1A|KIF11|FMN2|ING1|PKD1|KIF15|SEPT8|MRPL41|PPP3CA|SEPT9|HHEX|SEPT6|CHAF1A|SENP5|EX…
9650	UV protection	0.00010653	SCARA3|FEN1|GPX1|ERCC3|CAT|ERCC2|SDF4|ERCC5
80090	regulation of primary metabolic process	0.00011084	ZNF174|EHMT1|PSMD8|PSMD4|AKT2|ZXDC|HOXA3|AKT1|ADNP2|PRKACA|JUNB|ZNF287|TSPYL2|GABARAPL2|PRKAB2|ZNF284|ZNF283|PRKCD|MED8|RFX3|HCFC2|MED4|ISL1|ZNF14|SND1|DKK3|EID1|DDIT3|ZSCAN21|RFX5|TBPL1|ATF3|ASF1A|ATF4|ZNF277|ZNF28|ZBTB8A|CTBP1|PRKDC|ZNF391|SHOX2|CDCA7|BAZ2A|ZNF24|ZNF25|ARPP19|PRKCZ|PRDX3|PRKAR2A|MYO6|ZSCAN12|ZNF266|HEXIM1|ABCA1|CREBBP|JUN|NDFIP2|ZNF142|JUND|ZNF382|ZNF140|EIF2AK1|NFATC3|PBX2|MRP…
6464	protein modification process	0.00011435	EHMT1|UBE2L6|DCAF7|HERC5|RPS6KA6|NUB1|RNF115|CDC23|TRIM28|AKT2|RPS6KA1|AKT1|KAT8|PLCE1|PRKACA|ATXN7L3|PDK2|HERC6|TRIM23|PRKCI|PRKCD|CSNK2A2|CSNK1D|CSNK1E|MAPK8IP3|WDR82|KCTD13|ULK1|TRIM16|PRKD1|TTLL12|MTMR3|ANAPC16|CTBP1|PRKDC|BAZ2A|RTF1|UBE2J2|PRKCZ|NUAK2|PTPMT1|KIAA1804|ST3GAL3|ABCA1|CREBBP|EIF2AK1|PLK2|EIF2AK4|PPP5C|PPT1|NMT2|DZIP3|RNF220|CDK16|BTG2|CDKN1A|PTPRQ|PIGP|PRKAG1|ASH2L|IKBKAP|PTPRF|…
15031	protein transport	0.00012021	RAB3B|NDUFA13|NUP188|TOMM20|TOMM22|KPNA6|AKT1|AP1S1|SIL1|VPS39|SEC63|NSF|GABARAPL2|CADPS2|PRKCI|NUP210|COG4|VPS33B|ATG9A|AP1B1|AIP|IMP4|ACTN4|SCAMP3|RAB30|HGS|CDC37|RAB35|ERP29|KDELR3|KIF20A|OPTN|COPA|TSG101|RAB5C|STXBP1|LIN7A|SNX3|SYNGR1|RAB11FIP1|MYO6|CLTCL1|S100A13|SNX9|SNX7|RAB6B|SNX8|SNX5|EXPH5|ABCA1|JUN|SNAPIN|AP4B1|SNUPN|APPBP2|CDK5|PPT1|CHMP2A|ISY1|RPAIN|GDI1|SNX12|CLTB|CLTA|ARRB1|AP2A1|A…
55114	oxidation reduction	0.00012819	PECR|OXNAD1|NDUFA13|KDM1A|NDUFA11|KDM1B|NDUFA10|ALKBH6|ALDH1L2|ALKBH5|AKR7A2|ALKBH1|HADH|FADS1|KDM2B|SDHA|PGD|SDHB|OXA1L|MTHFD2|UQCRC1|ALDH7A1|STEAP2|GLYR1|TSTA3|H6PD|COX15|NDUFB11|CTBP1|UQCRH|PRDX3|DHRS7B|NDUFV1|HMOX2|VAT1|SURF1|PDHA1|SRD5A1|IDH1|IDH2|MICAL3|CYBRD1|COQ7|ACADSB|QDPR|ALDH6A1|CPS1|FASN|CRYL1|NDUFAF1|DHCR7|DHRS12|DHRS13|ACADVL|HIBADH|ETFA|ETFB|DHTKD1|CYP4V2|ME1|PHGDH|HIF1AN|AASS|CBR…
34613	cellular protein localization	0.00013489	RPAIN|NDUFA13|CLTB|CLTA|AP2A1|AP2A2|DUSP16|TOMM20|TOMM22|PPP3CA|SEC61A1|HHEX|KPNA6|AKT1|AP1S1|SIL1|SEC63|SUN1|PRKCI|SEC13|DYNLT1|USP4|TINF2|AP1B1|AIP|IMP4|ARFGAP3|TERF2|OXA1L|HGS|CDC37|ATG4C|ERP29|TERF2IP|ARHGEF2|KDELR3|OPTN|COPA|SEC23A|STX17|STX16|UNC93B1|COX18|TIMM9|RPL11|HTT|KATNB1|TRAK1|EGFR|HDAC6|STX10|GGA2|AP3M2|GGA1|SYNGR1|LMNA|MYO6|CLTCL1|MAPK1|FLNA|STX4|SNX9|STX2|EXPH5|BBS2|TIMM8A|JUN|PE…
45184	establishment of protein localization	0.00015334	RAB3B|NDUFA13|NUP188|TOMM20|TOMM22|KPNA6|AKT1|AP1S1|SIL1|VPS39|SEC63|NSF|GABARAPL2|CADPS2|PRKCI|NUP210|COG4|VPS33B|ATG9A|AP1B1|AIP|IMP4|ACTN4|SCAMP3|RAB30|HGS|CDC37|RAB35|ERP29|KDELR3|KIF20A|OPTN|COPA|TSG101|RAB5C|STXBP1|LIN7A|SNX3|SYNGR1|RAB11FIP1|MYO6|CLTCL1|S100A13|SNX9|SNX7|RAB6B|SNX8|SNX5|EXPH5|ABCA1|JUN|SNAPIN|AP4B1|SNUPN|APPBP2|CDK5|PPT1|CHMP2A|ISY1|RPAIN|GDI1|SNX12|CLTB|CLTA|ARRB1|AP2A1|A…
31326	regulation of cellular biosynthetic process	0.00016213	ZNF174|EHMT1|AKT2|ZXDC|HOXA3|AKT1|ADNP2|PRKACA|JUNB|ZNF287|TSPYL2|ZNF284|ZNF283|MED8|RFX3|HCFC2|MED4|ISL1|ZNF14|SND1|DKK3|EID1|DDIT3|ZSCAN21|RFX5|TBPL1|ATF3|ASF1A|ATF4|ZNF277|ZNF28|ZBTB8A|CTBP1|PRKDC|ZNF391|SHOX2|CDCA7|BAZ2A|ZNF24|ZNF25|ARPP19|PRDX3|MYO6|ZSCAN12|ZNF266|HEXIM1|ABCA1|CREBBP|JUN|ZNF142|JUND|ZNF382|ZNF140|EIF2AK1|NFATC3|PBX2|MRPL28|NR1D2|EIF2AK4|TADA2B|GTF2IRD1|ZNF138|BTG2|RARG|ZNF49…
16573	histone acetylation	0.0001846	MBD3|CPA3|CREBBP|TAF12|JADE1|ARRB1|TAF5L|KAT2B|ING5|KAT2A|KAT6A|RUVBL2|TADA3|KAT8|TADA1|TRIM16|DMAP1|SMAP2|CPA4
70647	protein modification by small protein conjugation or removal	0.00020668	RNF11|UBE3C|USP32|USP33|FBXO25|ARRB1|TNFAIP1|ARRB2|DCAF7|NUB1|RNF115|CDC23|AKT1|CIR1|ATXN7L3|TRIM23|MYLIP|USP7|USP4|USP3|USP2|UBE4B|LMO7|SENP2|RBX1|RNF41|DDB1|RNF168|KAT2A|UBE2R2|KCTD13|ANAPC5|TSG101|ANAPC16|USP10|USP11|RNF8|CBL|PCNP|VHL|DCAF10|DCAF12|SUZ12|UBE2H|MAP3K1|HUWE1|KLHL9|UBE2S|ZNF738|UBE2T|TTC3|RLIM|ERCC8|SAE1|DZIP3|RNF220
16567	protein ubiquitination	0.0002228	RNF11|TSG101|UBE3C|ANAPC16|FBXO25|RNF8|ARRB1|TNFAIP1|ARRB2|CBL|DCAF7|PCNP|NUB1|RNF115|CDC23|AKT1|CIR1|VHL|DCAF10|DCAF12|TRIM23|SUZ12|MYLIP|UBE2H|MAP3K1|HUWE1|UBE4B|LMO7|RBX1|RNF41|DDB1|KLHL9|RNF168|UBE2R2|UBE2S|ZNF738|UBE2T|TTC3|KCTD13|RLIM|ERCC8|ANAPC5|SAE1|DZIP3|RNF220
45449	regulation of transcription	0.00025915	RSC1A1|SMARCB1|ZNF174|EHMT1|RPS14|TRIM28|ZNF607|AKT2|ZNF726|ZXDC|HOXA3|KAT8|ZNF844|ADNP2|ATXN7L3|JUNB|ZNF287|TSPYL2|SMARCC1|SMARCC2|ZNF284|ZNF283|ZFP2|MED8|RFX3|MIF|HCFC2|MED4|ISL1|ZNF14|SND1|DKK3|EID1|CARHSP1|THAP7|DDIT3|ZSCAN21|RFX5|ZNF713|TBPL1|TRIM16|ATF3|ASF1A|ATF4|ZNF277|ZNF28|ZBTB8A|CTBP1|PRKDC|ZNF391|SHOX2|CDCA7|TWIST2|BAZ2A|RTF1|ZNF24|ZNF25|MED12L|GMCL1|PRDX3|HLTF|MYO6|ZSCAN12|ZNF701|SCA…
9889	regulation of biosynthetic process	0.0002622	ZNF174|EHMT1|AKT2|ZXDC|HOXA3|AKT1|ADNP2|PRKACA|JUNB|ZNF287|TSPYL2|ZNF284|ZNF283|MED8|RFX3|HCFC2|MED4|ISL1|ZNF14|SND1|DKK3|EID1|DDIT3|ZSCAN21|RFX5|TBPL1|ATF3|ASF1A|ATF4|ZNF277|ZNF28|ZBTB8A|CTBP1|PRKDC|ZNF391|SHOX2|CDCA7|BAZ2A|ZNF24|ZNF25|ARPP19|PRDX3|MYO6|ZSCAN12|ZNF266|HEXIM1|ABCA1|CREBBP|JUN|ZNF142|JUND|ZNF382|ZNF140|EIF2AK1|NFATC3|PBX2|MRPL28|NR1D2|EIF2AK4|TADA2B|GTF2IRD1|ZNF138|BTG2|RARG|ZNF49…
6289	nucleotide-excision repair	0.00027775	RFC1|RFC2|XPA|RPA1|RPA2|XPC|FANCC|RAD23A|GTF2H3|GTF2H5|DDB1|CDK7|SLX4|ERCC3|POLD2|ERCC2|ERCC8|ERCC5|POLL|POLE
44248	cellular catabolic process	0.00029313	FBXO21|NUDT5|ALDH1L2|PSMD8|NUB1|CDC23|PSMD4|PIM1|FBXO8|HADH|JUNB|MCCC2|GABARAPL2|MYLIP|USP7|USP4|USP3|USP2|ATG9A|UBE4B|SDHA|SDHB|CLPX|RBX1|KCTD13|SUCLG2|ANAPC5|CUL7|TSG101|RNASEH2A|CNP|RBM8A|SHMT1|XPA|UBR3|XPC|PLD2|PRDX3|SGPL1|AFMID|PLCG1|HMOX2|UBE2H|IDH1|IDH2|ALDH6A1|CDK7|NPLOC4|CPS1|CDK5|UBE2S|PPT1|CDK1|ADA|RNF11|FEN1|ACADVL|UBXN1|USP32|USP33|ARRB1|TNFAIP1|ARRB2|ARIH1|AASS|DFFA|GPX1|GPX4|NCBP2|…
51301	cell division	0.00030882	PIK3CB|KIF11|FMN2|PPP1CC|SEPT9|SEPT6|CDC23|SENP5|NUSAP1|KMT5A|NEK3|TXNL4A|HELLS|DYNLT1|HAUS4|CDC25C|SMC1A|CKAP5|SIRT2|CDC25B|CIT|PSRC1|LATS2|INCENP|KIFC1|RAB35|SPECC1L|TIMELESS|BIRC5|ANAPC5|KIF2C|MAPRE3|ARHGEF2|TSG101|ROCK1|ANAPC16|CDCA5|MIS12|RNF8|KATNB1|DSN1|HAUS7|NUP43|STX2|NEK9|CENPV|NEK4|SPAG5|RCC2|NDE1|HN1|ZWINT|KLHL9|MAD2L2|CDK7|CDK5|UBE2S|PRC1|CDK4|ERCC2|CCNG1|CDK2|CDK1|CENPO|MAD2L1
19222	regulation of metabolic process	0.00030905	ZNF174|EHMT1|PSMD8|PSMD4|AKT2|ALKBH1|ZXDC|HOXA3|AKT1|ADNP2|PLCE1|PRKACA|JUNB|CDK5RAP3|ZNF287|TSPYL2|GABARAPL2|PRKAB2|ZNF284|ZNF283|PRKCD|MED8|RFX3|HCFC2|MED4|ISL1|ZNF14|SND1|DKK3|EID1|DDIT3|ZSCAN21|RFX5|TBPL1|ATF3|ASF1A|ATF4|ZNF277|ZNF28|ZBTB8A|CTBP1|PRKDC|NPRL2|ZNF391|SHOX2|CDCA7|BAZ2A|ZNF24|ZNF25|ARPP19|PRKCZ|PRDX3|PRKAR2A|MYO6|ZSCAN12|ZNF266|HEXIM1|ABCA1|CREBBP|JUN|NDFIP2|ZNF142|JUND|ZNF382|ZN…
31323	regulation of cellular metabolic process	0.00040373	ZNF174|EHMT1|PSMD8|PSMD4|AKT2|ZXDC|HOXA3|AKT1|ADNP2|PLCE1|PRKACA|JUNB|CDK5RAP3|ZNF287|TSPYL2|GABARAPL2|PRKAB2|ZNF284|ZNF283|PRKCD|MED8|RFX3|HCFC2|MED4|ISL1|ZNF14|SND1|DKK3|EID1|DDIT3|ZSCAN21|RFX5|TBPL1|ATF3|ASF1A|ATF4|ZNF277|ZNF28|ZBTB8A|CTBP1|PRKDC|NPRL2|ZNF391|SHOX2|CDCA7|BAZ2A|ZNF24|ZNF25|ARPP19|PRKCZ|PRDX3|PRKAR2A|MYO6|ZSCAN12|ZNF266|HEXIM1|ABCA1|CREBBP|JUN|NDFIP2|ZNF142|JUND|ZNF382|ZNF140|EI…
7005	mitochondrion organization	0.0004254	GFM2|COX18|TIMM9|IFI6|HTRA2|HTT|CLU|TOMM20|TOMM22|PRDX3|CASP7|ICT1|MAN2A1|PIM1|AKT1|TK2|TIMM8A|JUN|CXADR|MAP3K1|GPX1|MTX2|AIP|COQ7|GGCT|OXA1L|NDUFS8|RRM2B|NDUFS7|TOMM70A|NDUFS4|TOMM7|BAX|TOMM5
48193	Golgi vesicle transport	0.00049708	COPA|SEC23A|STX16|HTT|CLTA|ARRB1|AP2A1|STX10|GOLGA3|BLOC1S1|AP1S1|STX4|RAB6B|RAB8A|TXNDC5|TRAPPC2|TRAPPC3|GABARAPL2|PRKCI|SEC13|TRAPPC2L|TRAPPC4|COG4|AP1B1|SCAMP3|ARCN1|DNM2|RER1|DNAJC6|GOPC|SEC24C|STEAP2|OPTN|SEC22C
6886	intracellular protein transport	0.00049708	RPAIN|NDUFA13|CLTB|CLTA|AP2A1|AP2A2|DUSP16|TOMM20|TOMM22|PPP3CA|SEC61A1|KPNA6|AKT1|AP1S1|SIL1|SEC63|PRKCI|SEC13|DYNLT1|AP1B1|AIP|IMP4|ARFGAP3|HGS|CDC37|ATG4C|ERP29|ARHGEF2|OPTN|COPA|SEC23A|STX17|STX16|UNC93B1|TIMM9|RPL11|HTT|KATNB1|TRAK1|HDAC6|STX10|GGA2|AP3M2|GGA1|SYNGR1|LMNA|MYO6|CLTCL1|MAPK1|STX4|SNX9|STX2|EXPH5|TIMM8A|JUN|PEX19|SNAPIN|MTX2|AP3D1|KLHL2|XPO7|PEX13|AP4B1|SNUPN|ARCN1|APPBP2|CDK5|…
280	nuclear division	0.00051036	KIF11|KIF15|CDC23|NUSAP1|KMT5A|NEK3|TXNL4A|HELLS|DYNLT1|HAUS4|KIF22|SMC1A|CKAP5|SIRT2|CDC25B|CIT|TUBB2B|CLIP1|PSRC1|LATS2|INCENP|KIFC1|TIMELESS|BIRC5|ANAPC5|KIF2C|MAPRE3|ARHGEF2|ANAPC16|CDCA5|MIS12|RNF8|KATNB1|DSN1|HAUS7|CLTCL1|NUP43|NEK9|CENPV|NEK4|SPAG5|RCC2|NDE1|ZWINT|KLHL9|MAD2L2|PPP5C|CCNG1|CDK2|CDK1|MAD2L1
7067	mitosis	0.00051036	KIF11|KIF15|CDC23|NUSAP1|KMT5A|NEK3|TXNL4A|HELLS|DYNLT1|HAUS4|KIF22|SMC1A|CKAP5|SIRT2|CDC25B|CIT|TUBB2B|CLIP1|PSRC1|LATS2|INCENP|KIFC1|TIMELESS|BIRC5|ANAPC5|KIF2C|MAPRE3|ARHGEF2|ANAPC16|CDCA5|MIS12|RNF8|KATNB1|DSN1|HAUS7|CLTCL1|NUP43|NEK9|CENPV|NEK4|SPAG5|RCC2|NDE1|ZWINT|KLHL9|MAD2L2|PPP5C|CCNG1|CDK2|CDK1|MAD2L1
6563	L-serine metabolic process	0.00051502	SRR|SHMT2|CBS|PSAT1|SHMT1|PHGDH|PGD
19219	regulation of nucleobase, nucleoside, nucleotide and nucleic acid metabolic process	0.00052323	ZNF174|EHMT1|AKT2|ZXDC|HOXA3|ADNP2|JUNB|ZNF287|TSPYL2|GABARAPL2|ZNF284|ZNF283|MED8|RFX3|HCFC2|MED4|ISL1|ZNF14|SND1|DKK3|EID1|DDIT3|ZSCAN21|RFX5|TBPL1|ATF3|ASF1A|ATF4|ZNF277|ZNF28|ZBTB8A|CTBP1|PRKDC|ZNF391|SHOX2|CDCA7|BAZ2A|ZNF24|ZNF25|PRDX3|MYO6|ZSCAN12|ZNF266|HEXIM1|ABCA1|CREBBP|JUN|ZNF142|JUND|ZNF382|ZNF140|NFATC3|PBX2|MRPL28|NR1D2|TADA2B|HNRNPF|GTF2IRD1|ZNF138|BTG2|RARG|ZNF492|PHF20|ATF7IP2|ME…
33036	macromolecule localization	0.00052662	RAB3B|NDUFA13|NUP188|ATP8A1|CD81|FMR1|CLU|TOMM20|TOMM22|OSBP|PALM|KPNA6|AKT1|AP1S1|SIL1|VPS39|SEC63|NSF|GABARAPL2|CADPS2|PRKCI|NUP210|USP4|COG4|TINF2|VPS33B|ATG9A|AP1B1|AIP|ATP11C|IMP4|TSC1|ATP11A|ACTN4|MAPK8IP3|SCAMP3|OXA1L|RAB30|DDX39B|HGS|CDC37|RAB35|ERP29|ULK1|KDELR3|KIF20A|EZR|OPTN|COPA|TSG101|RAB5C|RBM8A|COX18|STXBP1|LIN7A|SNX3|SYNGR1|RAB11FIP1|MYO6|CLTCL1|PSAP|S100A13|SNX9|SNX7|RAB6B|SNX8|…
51171	regulation of nitrogen compound metabolic process	0.00055535	ZNF174|EHMT1|AKT2|ZXDC|HOXA3|AKT1|ADNP2|JUNB|ZNF287|TSPYL2|GABARAPL2|ZNF284|ZNF283|MED8|RFX3|HCFC2|MED4|ISL1|ZNF14|SND1|DKK3|EID1|DDIT3|ZSCAN21|RFX5|TBPL1|ATF3|ASF1A|ATF4|ZNF277|ZNF28|ZBTB8A|CTBP1|PRKDC|ZNF391|SHOX2|CDCA7|BAZ2A|ZNF24|ZNF25|PRDX3|MYO6|ZSCAN12|ZNF266|HEXIM1|ABCA1|CREBBP|JUN|ZNF142|JUND|ZNF382|ZNF140|NFATC3|PBX2|MRPL28|NR1D2|TADA2B|HNRNPF|GTF2IRD1|ZNF138|BTG2|RARG|ZNF492|PHF20|ATF7I…
42180	cellular ketone metabolic process	0.00067792	PECR|EPRS|ENO2|ALDH1L2|UROD|FPGS|HADH|FADS1|MCCC2|PRKAB2|ACSL1|SARS|MIF|SDHA|PGD|SDHB|POLG2|KARS|MTHFD2|ACOT1|TARS2|ATF3|ATF4|AASDH|SHMT2|SHMT1|MGST2|LIAS|SGPL1|ORC1|AFMID|LTA4H|YARS|ATP8B1|IDH1|GFPT2|IDH2|GFPT1|ASNS|MCAT|COQ7|ACADSB|ACSF2|COQ5|QDPR|COQ3|ALDH6A1|QARS|CPS1|FASN|CRYL1|IARS|AARS|ACADVL|HIBADH|PRKAG1|MTR|GHR|NANP|SCPEP1|RNPEP|ME1|PHGDH|AASS|CBR1|ARG2|TPI1|WARS|ELOVL4|BCKDHB|AKR1A1|PT…
48285	organelle fission	0.00067792	KIF11|KIF15|CDC23|NUSAP1|KMT5A|NEK3|TXNL4A|HELLS|DYNLT1|HAUS4|KIF22|SMC1A|CKAP5|SIRT2|CDC25B|CIT|TUBB2B|CLIP1|PSRC1|LATS2|INCENP|KIFC1|TIMELESS|BIRC5|ANAPC5|KIF2C|MAPRE3|ARHGEF2|ANAPC16|CDCA5|MIS12|RNF8|KATNB1|DSN1|HAUS7|CLTCL1|NUP43|NEK9|CENPV|NEK4|SPAG5|RCC2|NDE1|ZWINT|KLHL9|MAD2L2|PPP5C|CCNG1|CDK2|CDK1|BAX|MAD2L1
6473	protein amino acid acetylation	0.00068124	MBD3|CPA3|CREBBP|TAF12|JADE1|ARRB1|TAF5L|KAT2B|ING5|KAT2A|KAT6A|RUVBL2|TADA3|KAT8|TADA1|TRIM16|DMAP1|SMAP2|CPA4
22403	cell cycle phase	0.000719	CDKN1A|KIF11|FMN2|KIF15|LSM10|PPP3CA|CDC23|EXO1|PIM1|NUSAP1|AKT1|KMT5A|NEK3|TXNL4A|SKP2|POLE|HELLS|DYNLT1|TOP3A|HAUS4|KIF22|CDC25C|SMC1A|TUBG1|CKAP5|SIRT2|CDC25B|CIT|DNM2|TUBB2B|ILF3|CLIP1|PSRC1|LATS2|INCENP|KIFC1|TIMELESS|BIRC5|RPL24|ANAPC5|KIF2C|MAPRE3|ARHGEF2|KHDRBS1|ANAPC16|CDCA5|MIS12|RNF8|KATNB1|PPM1D|EGFR|DSN1|HAUS7|CLTCL1|E2F1|RAD54L|NUP43|MBD3|NEK9|DYNC1H1|CENPV|NEK4|SPAG5|GADD45A|RCC2|N…
32446	protein modification by small protein conjugation	0.00080793	RNF11|TSG101|UBE3C|ANAPC16|FBXO25|RNF8|ARRB1|TNFAIP1|ARRB2|CBL|DCAF7|PCNP|NUB1|RNF115|CDC23|AKT1|CIR1|VHL|DCAF10|DCAF12|TRIM23|SUZ12|MYLIP|UBE2H|MAP3K1|HUWE1|UBE4B|LMO7|SENP2|RBX1|RNF41|DDB1|KLHL9|RNF168|UBE2R2|UBE2S|ZNF738|UBE2T|TTC3|KCTD13|RLIM|ERCC8|ANAPC5|SAE1|DZIP3|RNF220
6261	DNA-dependent DNA replication	0.00087824	RPAIN|FEN1|RFC1|PRIM1|TOP3A|RPA1|RPA2|CDC45|RAD51|RRM2B|POLG2|ORC1|TOP1MT|POLD2|MCM3|TK2|MCM5|MCM6|MCM2
6396	RNA processing	0.00091018	POP5|PDCD7|RPL10A|THG1L|LSM10|EFTUD2|RPS14|FBL|SNRPD2|RPS19|SNIP1|ARL6IP4|CIR1|SNRPD3|SNRNP35|TXNL4A|SNRPN|DIMT1|SSU72|SARS|IMP4|GTF2F1|FTSJ3|PRPF4|PRPF6|KARS|DDX39B|RRAGC|RPP21|CD2BP2|PPIG|SNRPC|SNRNP200|SNRPA|SNRPB|KHDRBS1|DHX8|RBM8A|PRPF8|SYMPK|RBM10|CPSF1|CWC15|LSM4|SNUPN|WDR55|LSM2|HNRNPF|INTS4|HNRNPC|AARS|ISY1|INTS10|ADAR|RBM3|SART3|SNRNP70|PCF11|PRMT5|CNOT6L|NCBP2|PABPC4|DDX56|DDX54|TFIP11…
6260	DNA replication	0.0010292	RPAIN|FEN1|RNASEH2A|PRIM1|MCM10|TNFAIP1|ING5|CHAF1A|CDC45|CHTF8|ORC1|RBBP4|TGS1|TOP1MT|POLD2|TK2|POLL|JUNB|POLE|POLH|CDT1|RMI2|RFC1|RMI1|RFC2|TOP3A|RPA1|RPA2|WRNIP1|CDC25C|TERF2|SIRT1|RAD51|RRM2B|POLG2|CDK2|KCTD13|MCM3|TERF2IP|MCM5|MCM6|MCM2
70271	protein complex biogenesis	0.0010734	PRKAG1|IKBKAP|TTF1|EPRS|TOMM22|SEPT9|PREX1|TUBB6|CHAF1A|TRIM4|PIM1|AASS|COG4|DHPS|ACOT13|TSC1|MIF|TUBG2|MED4|GTF2F1|TUBG1|OXA1L|TUBB2B|NDUFS8|NDUFS7|THRAP3|CAT|NDUFS4|TBPL1|ANG|ALDOC|DCTPP1|LLGL1|ATPAF1|GTF3C4|COX15|SHMT1|COX18|MIS12|LIN7A|ITPR3|RTF1|PRKCZ|HSD17B10|UQCRH|GTF2E2|SRR|MED30|POLR2A|PRKAR2A|POLR2E|TCEB2|FLNA|STX4|PCBD2|VHL|POLR2I|CBR4|CREBBP|SURF1|MAP3K1|GCH1|TAF12|GSS|FANCA|FANCC|TUB…
6461	protein complex assembly	0.0010734	PRKAG1|IKBKAP|TTF1|EPRS|TOMM22|SEPT9|PREX1|TUBB6|CHAF1A|TRIM4|PIM1|AASS|COG4|DHPS|ACOT13|TSC1|MIF|TUBG2|MED4|GTF2F1|TUBG1|OXA1L|TUBB2B|NDUFS8|NDUFS7|THRAP3|CAT|NDUFS4|TBPL1|ANG|ALDOC|DCTPP1|LLGL1|ATPAF1|GTF3C4|COX15|SHMT1|COX18|MIS12|LIN7A|ITPR3|RTF1|PRKCZ|HSD17B10|UQCRH|GTF2E2|SRR|MED30|POLR2A|PRKAR2A|POLR2E|TCEB2|FLNA|STX4|PCBD2|VHL|POLR2I|CBR4|CREBBP|SURF1|MAP3K1|GCH1|TAF12|GSS|FANCA|FANCC|TUB…
22904	respiratory electron transport chain	0.0018939	NDUFA8|NDUFA7|COX15|NDUFB5|NDUFA10|NDUFA2|NDUFB1|SDHA|SDHB|COQ7|UQCRH|NDUFS8|SDHAF2|NDUFS7|NDUFS4|UQCRC1|NDUFS2|NDUFS1|NDUFAF1|NDUFV1
6119	oxidative phosphorylation	0.0019432	COX15|NDUFB5|ATP5A1|NDUFA10|ATP5C1|NDUFB1|ATP5I|ATP5G2|UQCRH|NDUFV1|ATP6V1D|ATP6V1F|NDUFA8|NDUFA7|ATP6V0B|ATP6V0E1|NDUFA2|COQ7|NDUFS8|SDHAF2|NDUFS7|NDUFS4|ATP6V1B2|UQCRC1|NDUFS2|NDUFS1|NDUFAF1
46483	heterocycle metabolic process	0.0021887	ALAS1|ATP8A1|ATP5C1|MTR|NUDT5|ATP5G2|ALDH1L2|ADAL|GHR|UROD|GUK1|FPGS|TMEM14C|ATP6V0B|ATP6V0E1|ATP11C|NME4|ATP11A|ATP1B1|DCK|NME1|MTHFD2|RP2|ATP6V1B2|ADSSL1|TBPL1|BLVRB|NDUFS1|PDE5A|MOCS1|BLVRA|PDXK|CNP|FRRS1|COX15|SHMT1|ATP5A1|IREB2|AK1|ATP5I|ADCY1|ATP1A1|LIAS|PAPSS1|MTHFSD|FIGNL1|AFMID|MAPK1|PCBD2|ATP6V1D|NADK|HMOX2|ATP6V1F|GCH1|TPK1|ATP8B1|EIF2AK1|ATP2B4|NUDT9|SMUG1|QDPR|ALDH6A1|PSAT1|IMPDH2|ADA
51187	cofactor catabolic process	0.0022951	FH|IDH1|IDH2|DLST|PDHB|SDHA|ALDH1L2|SDHB|SUCLG2|BLVRB|HMOX2|BLVRA|CBR3
9057	macromolecule catabolic process	0.0022951	PYGB|RNF11|FEN1|UBXN1|USP32|FBXO27|USP33|ARRB1|TNFAIP1|ARRB2|FBXO21|PSMD8|NUB1|CDC23|PSMD4|PIM1|AKT1|ARIH1|FBXO8|JUNB|MYLIP|USP7|DFFA|USP4|NCBP2|PABPC4|USP3|USP2|USP45|UBE4B|RAD23A|CLPX|RBX1|PJA1|DDB1|KCTD13|YME1L1|DNASE2|ANAPC5|USP41|FH|CUL7|TSG101|RNASEH2A|RBM8A|USP10|USP11|XPA|UBR3|XPC|SPG7|HDAC6|PCNP|PSMB6|EXOSC7|ERLEC1|SLX4|PSMB5|PPP1R8|DROSHA|VHL|LDLR|UBE2H|MAP3K1|MGA|RPA1|RPA2|GTF2H3|MTOR|…
43543	protein amino acid acylation	0.0022951	MBD3|CPA3|CREBBP|TAF12|JADE1|ARRB1|TAF5L|KAT2B|ING5|KAT2A|KAT6A|RUVBL2|TADA3|NMT2|KAT8|TADA1|TRIM16|DMAP1|SMAP2|CPA4
22402	cell cycle process	0.0024015	LSM10|PSMD8|CDC23|PSMD4|PIM1|NUSAP1|AKT1|KMT5A|NEK3|TXNL4A|SKP2|CDC25C|CDC25B|ILF3|CLIP1|DDIT3|TIMELESS|RPL24|ANAPC5|KHDRBS1|TSG101|ANAPC16|CDCA5|DSN1|CLTCL1|NEK9|NEK4|GADD45A|RCC2|FANCA|ZWINT|PPP5C|UBE2S|CDK4|CDK2|JMY|CDK1|MDM4|TCF3|CDKN1A|KIF11|FMN2|PKD1|KIF15|PPP3CA|EXO1|WDR6|POLE|HELLS|DYNLT1|TOP3A|HAUS4|KIF22|SMC1A|TUBG1|CKAP5|SIRT2|CIT|DNM2|KAT2B|TUBB2B|PSRC1|LATS2|INCENP|KIFC1|BIRC5|KIF2C|…
718	nucleotide-excision repair, DNA damage removal	0.0024015	DDB1|CDK7|ERCC3|ERCC2|XPA|RPA1|RPA2|ERCC5|XPC|GTF2H3
279	M phase	0.0024407	KIF11|FMN2|KIF15|CDC23|EXO1|NUSAP1|KMT5A|NEK3|TXNL4A|HELLS|DYNLT1|TOP3A|HAUS4|KIF22|CDC25C|SMC1A|TUBG1|CKAP5|SIRT2|CDC25B|CIT|TUBB2B|ILF3|CLIP1|PSRC1|LATS2|INCENP|KIFC1|TIMELESS|BIRC5|RPL24|ANAPC5|KIF2C|MAPRE3|ARHGEF2|ANAPC16|CDCA5|MIS12|RNF8|KATNB1|DSN1|HAUS7|CLTCL1|RAD54L|NUP43|MBD3|NEK9|DYNC1H1|CENPV|NEK4|SPAG5|RCC2|NDE1|FANCA|RPA1|MPP6|ZWINT|KLHL9|MAD2L2|PPP5C|RAD51|UBE2S|PRC1|CCNG1|CDK2|CDK1…
8380	RNA splicing	0.0024462	ISY1|PDCD7|LSM10|EFTUD2|SNRPD2|SNRNP70|PCF11|ARL6IP4|CIR1|SNRPD3|SNRNP35|TXNL4A|PRMT5|SNRPN|NCBP2|TFIP11|SMC1A|GTF2F1|MSL1|PRPF4|PRPF6|PRPF18|DDX39B|RRAGC|SYF2|CD2BP2|LUC7L3|NAA38|PABPC1|PPIG|SNRPC|SNRNP200|SNRPA|SKIV2L2|SNRPB|SF3B5|DHX8|RBM8A|PRPF8|POLR2A|TGS1|PPP1R8|POLR2E|POLR2I|SF3B1|RBM10|HNRNPA0|SF3A2|CPSF1|CWC15|LSM4|SNUPN|LSM2|SNRNP40|HNRNPF|SNRNP48|HNRNPC
43436	oxoacid metabolic process	0.0024462	PECR|EPRS|ENO2|ALDH1L2|UROD|FPGS|HADH|FADS1|MCCC2|PRKAB2|ACSL1|SARS|MIF|SDHA|PGD|SDHB|POLG2|KARS|MTHFD2|ACOT1|TARS2|ATF3|ATF4|AASDH|SHMT2|SHMT1|MGST2|LIAS|SGPL1|ORC1|AFMID|LTA4H|YARS|ATP8B1|IDH1|GFPT2|IDH2|GFPT1|ASNS|MCAT|ACADSB|ACSF2|QDPR|ALDH6A1|QARS|CPS1|FASN|CRYL1|IARS|AARS|ACADVL|HIBADH|PRKAG1|MTR|GHR|NANP|SCPEP1|RNPEP|ME1|PHGDH|AASS|ARG2|TPI1|WARS|ELOVL4|BCKDHB|AKR1A1|PTGR1|HADHB|SLC7A5|DAL…
19752	carboxylic acid metabolic process	0.0024462	PECR|EPRS|ENO2|ALDH1L2|UROD|FPGS|HADH|FADS1|MCCC2|PRKAB2|ACSL1|SARS|MIF|SDHA|PGD|SDHB|POLG2|KARS|MTHFD2|ACOT1|TARS2|ATF3|ATF4|AASDH|SHMT2|SHMT1|MGST2|LIAS|SGPL1|ORC1|AFMID|LTA4H|YARS|ATP8B1|IDH1|GFPT2|IDH2|GFPT1|ASNS|MCAT|ACADSB|ACSF2|QDPR|ALDH6A1|QARS|CPS1|FASN|CRYL1|IARS|AARS|ACADVL|HIBADH|PRKAG1|MTR|GHR|NANP|SCPEP1|RNPEP|ME1|PHGDH|AASS|ARG2|TPI1|WARS|ELOVL4|BCKDHB|AKR1A1|PTGR1|HADHB|SLC7A5|DAL…
43414	macromolecule methylation	0.0026082	HELLS|PRMT5|BTG2|DNMT1|PRMT2|KDM1B|PRMT1|CXXC1|EHMT1|BAZ2A|ASH2L|MTR|FTSJ3|METTL14|WDR82|RBBP5|TGS1|DNMT3B|RAD54L|DMAP1|RAB6B
32259	methylation	0.0026082	HELLS|PRMT5|BTG2|DNMT1|PRMT2|KDM1B|PRMT1|CXXC1|EHMT1|BAZ2A|ASH2L|MTR|FTSJ3|METTL14|WDR82|RBBP5|TGS1|DNMT3B|RAD54L|DMAP1|RAB6B
42773	ATP synthesis coupled electron transport	0.0026616	NDUFA8|NDUFA7|COX15|NDUFB5|NDUFA10|NDUFA2|NDUFB1|COQ7|UQCRH|NDUFS8|SDHAF2|NDUFS7|NDUFS4|UQCRC1|NDUFS2|NDUFS1|NDUFAF1|NDUFV1
42775	mitochondrial ATP synthesis coupled electron transport	0.0026616	NDUFA8|NDUFA7|COX15|NDUFB5|NDUFA10|NDUFA2|NDUFB1|COQ7|UQCRH|NDUFS8|SDHAF2|NDUFS7|NDUFS4|UQCRC1|NDUFS2|NDUFS1|NDUFAF1|NDUFV1
9411	response to UV	0.0026616	RPAIN|CDKN1A|SCARA3|FEN1|GPX1|CIRBP|XPA|UBE4B|XPC|EGFR|CASP7|ERCC3|CAT|ERCC2|AKT1|SDF4|ERCC8|ERCC5|POLH
44419	interspecies interaction between organisms	0.0027869	EIF4A2|SMARCB1|CD81|RPLP0|F11R|IFIH1|SEPT6|ZC3H7B|TRIM23|USP7|CXADR|GPX1|DYNLT1|HLA-B|HLA-C|RAD23A|HLA-A|CDC25C|SIRT1|KCTD5|SND1|DDB1|KAT2B|KAT2A|KARS|DDX39B|MDFIC|FKBP8|MFGE8|SLC25A6|FH|TSG101|SLC22A5|CTBP1|HDAC1|FBLN1|EFNB2|PSMB6|PSMB5|UBN1|EIF4H|POLR2E|MAPK1|FYN|PLCG1|LDLR|SF3B1|SPEN|CREBBP|JUN|APOBEC3G|EIF2AK1|STAT2|STAT3|PSMB8|PSMB9|COPS6|ERCC3|VAPB|ERCC2|GRB2|TAF5|RCOR1
9060	aerobic respiration	0.0029205	FH|SURF1|IDH1|IDH2|DLST|PDHB|SDHA|SDHB|UQCRH|OXA1L|CAT|UQCRC1|SUCLG2
377	RNA splicing, via transesterification reactions with bulged adenosine as nucleophile	0.003073	PRMT5|SF3A2|NCBP2|CWC15|PRPF8|SNUPN|MSL1|LSM2|PRPF4|PRPF6|SNRPD2|DDX39B|SNRNP70|TGS1|CD2BP2|NAA38|SNRPD3|HNRNPC|TXNL4A|SNRPC|SNRNP200|SF3B1|SNRPA|SNRPB
398	nuclear mRNA splicing, via spliceosome	0.003073	PRMT5|SF3A2|NCBP2|CWC15|PRPF8|SNUPN|MSL1|LSM2|PRPF4|PRPF6|SNRPD2|DDX39B|SNRNP70|TGS1|CD2BP2|NAA38|SNRPD3|HNRNPC|TXNL4A|SNRPC|SNRNP200|SF3B1|SNRPA|SNRPB
55086	nucleobase, nucleoside and nucleotide metabolic process	0.0033011	PANK2|HIBADH|TPMT|ATP8A1|ATP5C1|NUDT5|ATP5G2|ADAL|GUK1|ME1|DNMT3B|TK2|ATP6V0B|TPI1|ATP6V0E1|DCAKD|ATP11C|NME4|ATP11A|PGD|ATP1B1|DCK|NME1|RRM2B|RP2|ATP6V1B2|ADSSL1|TBPL1|NDUFS1|PDE5A|DCTPP1|GLYR1|PRPS2|H6PD|CNP|SHMT1|GMPR2|ATP5A1|AK1|DLST|ATP5I|ADCY1|ATP1A1|PAPSS1|PRPSAP1|FIGNL1|MAPK1|ATP6V1D|NADK|ATP6V1F|GCH1|ATP8B1|IDH1|ATP2B4|NUDT9|SMUG1|ALDH6A1|IMPDH2|ADA
51716	cellular response to stimulus	0.0033011	CDC14B|EME1|AKT2|ALKBH1|RUVBL2|LEPR|PIM1|AKT1|SNIP1|PRKACA|JUNB|FADS1|SMARCC1|PRKCI|FBXO18|USP3|ATG9A|NSMCE1|AIP|CSNK1D|WRNIP1|CSNK1E|MIF|MAPK8IP3|RBX1|POLG2|DDIT3|TIMELESS|ASF1A|ATF4|PRKDC|XPA|XPC|CNN2|SOCS2|PRDX3|NUAK2|PRKAR2A|MYO6|SCAP|KIAA1804|WDTC1|FANCI|EGR1|UVRAG|TRAP1|JUN|EIF2B3|FANCM|GADD45A|EIF2AK1|XRCC3|FANCA|ASNS|FANCC|EIF2AK4|COQ7|DAP|CDK7|TDP2|GNB2|GNB1|FAM175A|JMY|CDK1|GRB2|MAP3K12…
16044	cellular membrane organization	0.0033964	USP33|CLTA|ARRB1|AP2A1|ARRB2|AP2A2|TOMM22|GHR|MRC2|SERP1|OPHN1|AP1S1|SNAP29|RAB8A|SH3GL1|PRKCI|SEC13|VPS33B|AP1B1|EPS15L1|DNM1|DNM2|NME1|OXA1L|DNAJC6|PLSCR4|ULK1|MFGE8|STEAP2|DOCK1|COPA|FH|SEC23A|LRP1|COX18|TIMM9|STXBP1|HTT|EGFR|PLD2|SNX3|CYTH2|BLOC1S1|LMNA|MYO6|CLTCL1|PSAP|BNIP1|STX4|STX2|LDLR|TXNDC5|ABCA1|TIMM8A|GCA|M6PR|MERTK|IGF2R|ARCN1|MARCH2|EHD4|NPLOC4|CDK5|SNX17|PPT1|TRIP10|CD9|BAX|GRB2|P…
6082	organic acid metabolic process	0.0035309	PECR|EPRS|ENO2|ALDH1L2|UROD|FPGS|HADH|FADS1|MCCC2|PRKAB2|ACSL1|SARS|MIF|SDHA|PGD|SDHB|POLG2|KARS|MTHFD2|ACOT1|TARS2|ATF3|ATF4|AASDH|SHMT2|SHMT1|MGST2|LIAS|SGPL1|ORC1|AFMID|LTA4H|YARS|ATP8B1|IDH1|GFPT2|IDH2|GFPT1|ASNS|MCAT|ACADSB|ACSF2|QDPR|ALDH6A1|QARS|CPS1|FASN|CRYL1|IARS|AARS|ACADVL|HIBADH|PRKAG1|MTR|GHR|NANP|SCPEP1|RNPEP|ME1|PHGDH|AASS|ARG2|TPI1|WARS|ELOVL4|BCKDHB|AKR1A1|PTGR1|HADHB|SLC7A5|DAL…
61024	membrane organization	0.0036306	USP33|CLTA|ARRB1|AP2A1|ARRB2|AP2A2|TOMM22|GHR|MRC2|SERP1|OPHN1|AP1S1|SNAP29|RAB8A|SH3GL1|PRKCI|SEC13|VPS33B|AP1B1|EPS15L1|DNM1|DNM2|NME1|OXA1L|DNAJC6|PLSCR4|ULK1|MFGE8|STEAP2|DOCK1|COPA|FH|SEC23A|LRP1|COX18|TIMM9|STXBP1|HTT|EGFR|PLD2|SNX3|CYTH2|BLOC1S1|LMNA|MYO6|CLTCL1|PSAP|BNIP1|STX4|STX2|LDLR|TXNDC5|ABCA1|TIMM8A|GCA|M6PR|MERTK|IGF2R|ARCN1|MARCH2|EHD4|NPLOC4|CDK5|SNX17|PPT1|TRIP10|CD9|BAX|GRB2|P…
10605	negative regulation of macromolecule metabolic process	0.0042325	NDUFA13|ZNF174|KDM1A|FMR1|EHMT1|ARID4A|TTF1|PSMD8|YY1|RPS14|PAIP2B|CDC23|TRIM28|PSMD4|AKT2|KAT8|SNIP1|CIR1|KMT5A|PRKACA|MAF1|TSPYL2|SMARCC2|USP4|PRKCD|USP2|TINF2|RFX3|TSC1|MIF|SND1|DKK3|EID1|ILF3|THAP7|KAT6A|RFX5|TIMELESS|ANAPC5|KHDRBS1|DNMT1|TSG101|CNP|CTBP1|TWIST2|BAZ2A|ZNF24|PRKCZ|INPP5K|DMAP1|SUDS3|WDTC1|HEXIM1|EGR1|CDT1|JUN|NDFIP2|EIF2B3|CBX4|ZBTB14|ATP8B1|EIF2AK1|EIF2AK4|SUPT5H|SMARCA2|SMAR…
6730	one-carbon metabolic process	0.0049757	BTG2|DNMT1|AHCY|AHCYL1|KDM1A|SHMT2|KDM1B|SHMT1|CXXC1|EHMT1|BAZ2A|ASH2L|MTR|ALDH1L2|METTL14|RBBP5|ALKBH1|TGS1|FPGS|DNMT3B|RAD54L|DMAP1|RAB6B|HELLS|PRMT5|PRMT2|PRMT1|FTSJ3|MTHFD2|WDR82
44265	cellular macromolecule catabolic process	0.0051171	RNF11|FEN1|UBXN1|USP32|USP33|ARRB1|TNFAIP1|ARRB2|FBXO21|PSMD8|NUB1|CDC23|PSMD4|PIM1|ARIH1|FBXO8|JUNB|MYLIP|USP7|DFFA|USP4|NCBP2|PABPC4|USP3|USP2|USP45|UBE4B|RAD23A|CLPX|RBX1|DDB1|KCTD13|DNASE2|ANAPC5|USP41|FH|CUL7|TSG101|RNASEH2A|RBM8A|USP10|USP11|XPA|UBR3|XPC|HDAC6|PCNP|PSMB6|EXOSC7|ERLEC1|SLX4|PSMB5|PPP1R8|DROSHA|LDLR|UBE2H|MAP3K1|RPA1|RPA2|GTF2H3|PSMB8|PSMB9|SMUG1|PSMC5|CDK7|NPLOC4|ERCC3|UBE2S…
9892	negative regulation of metabolic process	0.0051255	NDUFA13|ZNF174|KDM1A|FMR1|EHMT1|ARID4A|TTF1|PSMD8|YY1|RPS14|PAIP2B|CDC23|TRIM28|PSMD4|AKT2|PALM|AKT1|KAT8|SNIP1|CIR1|KMT5A|PRKACA|MAF1|TSPYL2|SMARCC2|USP4|PRKCD|USP2|TINF2|RFX3|TSC1|MIF|SND1|DKK3|EID1|ILF3|THAP7|KAT6A|RFX5|TIMELESS|ANAPC5|KHDRBS1|DNMT1|TSG101|CNP|CTBP1|TWIST2|BAZ2A|ZNF24|PRKCZ|INPP5K|SCAP|DMAP1|SUDS3|WDTC1|HEXIM1|EGR1|CDT1|JUN|NDFIP2|EIF2B3|CBX4|ZBTB14|ATP8B1|EIF2AK1|EIF2AK4|SUPT…
375	RNA splicing, via transesterification reactions	0.005366	PRPF8|SNRPD2|SNRNP70|TGS1|SNRPD3|TXNL4A|SF3B1|PRMT5|SF3A2|NCBP2|CWC15|SNUPN|MSL1|LSM2|PRPF4|SNRNP40|PRPF6|DDX39B|CD2BP2|NAA38|HNRNPC|SNRPC|SNRNP200|SNRPA|SNRPB
31324	negative regulation of cellular metabolic process	0.0055806	NDUFA13|ZNF174|KDM1A|FMR1|EHMT1|ARID4A|TTF1|PSMD8|YY1|RPS14|PAIP2B|CDC23|TRIM28|PSMD4|AKT2|PALM|AKT1|KAT8|CIR1|KMT5A|PRKACA|MAF1|TSPYL2|SMARCC2|USP4|PRKCD|USP2|TINF2|RFX3|TSC1|DKK3|EID1|ILF3|THAP7|KAT6A|RFX5|TIMELESS|ANAPC5|KHDRBS1|DNMT1|TSG101|CNP|CTBP1|TWIST2|BAZ2A|ZNF24|PRKCZ|INPP5K|DMAP1|SUDS3|WDTC1|HEXIM1|EGR1|CDT1|JUN|EIF2B3|CBX4|ZBTB14|ATP8B1|EIF2AK1|EIF2AK4|SUPT5H|SMARCA2|SMARCA4|DRAP1|DA…
6979	response to oxidative stress	0.0068098	PPP1R15B|XPA|ETFDH|PARK7|LIAS|CLU|EGFR|HDAC6|PLD2|PRDX3|ADRBK1|PIM1|OLR1|PRKACA|HMOX2|TRAP1|JUN|SCARA3|GPX1|GPX4|GSS|GPX8|ARNT|FANCC|GLRX2|APTX|COQ7|NDUFS8|RRM2B|ERCC3|STK25|DDIT3|PXDN|CAT|ERCC2|CDK1|ERCC8|NDUFS2|ADA
9117	nucleotide metabolic process	0.0068098	PANK2|HIBADH|ATP8A1|ATP5C1|NUDT5|ATP5G2|ADAL|GUK1|ME1|TK2|ATP6V0B|TPI1|ATP6V0E1|DCAKD|ATP11C|NME4|ATP11A|PGD|ATP1B1|DCK|NME1|RRM2B|RP2|ATP6V1B2|ADSSL1|TBPL1|NDUFS1|PDE5A|DCTPP1|GLYR1|PRPS2|H6PD|CNP|GMPR2|ATP5A1|AK1|DLST|ATP5I|ADCY1|ATP1A1|PAPSS1|PRPSAP1|FIGNL1|ATP6V1D|NADK|ATP6V1F|GCH1|ATP8B1|IDH1|ATP2B4|NUDT9|SMUG1|IMPDH2|ADA
6753	nucleoside phosphate metabolic process	0.0068098	PANK2|HIBADH|ATP8A1|ATP5C1|NUDT5|ATP5G2|ADAL|GUK1|ME1|TK2|ATP6V0B|TPI1|ATP6V0E1|DCAKD|ATP11C|NME4|ATP11A|PGD|ATP1B1|DCK|NME1|RRM2B|RP2|ATP6V1B2|ADSSL1|TBPL1|NDUFS1|PDE5A|DCTPP1|GLYR1|PRPS2|H6PD|CNP|GMPR2|ATP5A1|AK1|DLST|ATP5I|ADCY1|ATP1A1|PAPSS1|PRPSAP1|FIGNL1|ATP6V1D|NADK|ATP6V1F|GCH1|ATP8B1|IDH1|ATP2B4|NUDT9|SMUG1|IMPDH2|ADA
6333	chromatin assembly or disassembly	0.012666	ARID4A|CHD4|CHD2|CHAF1A|HIRIP3|H2AFJ|KAT8|H1FX|HIST1H3I|HIST1H3D|TSPYL2|HELLS|CENPV|SMARCC1|CBX6|SMARCC2|CBX4|H2AFY|CBX1|H2AFV|CDYL|NAP1L4|H1F0|H2AFY2|KAT6A|HIST1H4I|HIST1H4C|ASF1A|MCM2
6740	NADPH regeneration	0.012666	TPI1|H6PD|HIBADH|IDH1|PGD|GLYR1
7017	microtubule-based process	0.013265	MAFIP|CNP|HTT|KATNB1|KIF11|FMN2|PRKCZ|HK1|KIF15|TUBB6|RHOT1|KIF3B|HAUS7|KIF5C|NUSAP1|KIF21A|KIF1B|BBS2|DYNC1H1|DYNLT1|SPAG5|GADD45A|NDE1|HAUS4|RFX3|TUBE1|KIF22|TUBG2|SMC1A|TUBG1|PEX13|DYNLL2|CKAP5|ZWINT|TUBB2B|TPPP3|PSRC1|KIFC1|PRC1|KIF16B|KIF4A|TBCE|TUBGCP3|KIF2C|TUBGCP4|KIF20A|MAPT|DNAL4
44271	cellular nitrogen compound biosynthetic process	0.013422	ALAS1|ATP8A1|ATP5C1|MTR|ATP5G2|ADAL|SPTLC2|UROD|RFK|ME1|AKT1|PHGDH|TMEM14C|ARG2|ATP6V0B|ATP6V0E1|ATP11C|NME4|ATP11A|PGD|ATP1B1|NME1|RRM2B|DDAH2|RP2|ATP6V1B2|ADSSL1|TBPL1|MOCS1|PRPS2|CNP|COX15|SHMT1|ATP5A1|IREB2|HTT|ATP5I|ADCY1|ATP1A1|OAZ1|PAPSS1|PRPSAP1|SRR|ORC1|CBS|PCBD2|ATP6V1D|ATP6V1F|GCH1|TPK1|ATP8B1|ATP2B4|ASNS|QDPR|TMLHE|CPS1|ETNK2|PSAT1|IMPDH2|ADA
51188	cofactor biosynthetic process	0.015221	PANK2|PDXK|ALAS1|GCH1|COX15|TPK1|DCAKD|IREB2|MGST2|LIAS|COQ7|COQ5|MTHFSD|NFU1|COQ3|MTHFD2|UROD|FPGS|DBT|ME1|HAGH|MOCS1|ISCU|TMEM14C
6898	receptor-mediated endocytosis	0.015462	LRP1|M6PR|ARRB1|ARRB2|IGF2R|DNM1|PLD2|DNM2|GHR|SNX17|CLTCL1|PPT1|AP1S1|GRB2|ULK1|PI4KB
31327	negative regulation of cellular biosynthetic process	0.015634	NDUFA13|ZNF174|KDM1A|FMR1|EHMT1|ARID4A|TTF1|YY1|RPS14|PAIP2B|TRIM28|PALM|KAT8|CIR1|KMT5A|PRKACA|MAF1|TSPYL2|SMARCC2|USP2|TINF2|RFX3|TSC1|DKK3|EID1|ILF3|THAP7|KAT6A|RFX5|TIMELESS|KHDRBS1|DNMT1|TSG101|CTBP1|TWIST2|BAZ2A|ZNF24|DMAP1|SUDS3|WDTC1|HEXIM1|EGR1|CDT1|EIF2B3|CBX4|ZBTB14|ATP8B1|EIF2AK1|EIF2AK4|SUPT5H|SMARCA2|SMARCA4|DRAP1|MDM4|TCF3|NF2|CREBZF|RARG|ACADVL|LDB1|THRA|CBY1|PIGX|HHEX|VPS72|MLX|D…
6446	regulation of translational initiation	0.015983	EIF4A2|EIF2B3|NCBP2|EIF2AK1|FMR1|MTIF2|EIF2AK4|PAIP2B|EIF3K|EIF4H|EIF3H|EIF3E|PAIP2|EIF4B
9259	ribonucleotide metabolic process	0.017633	PRPS2|ATP8A1|ATP5A1|AK1|ATP5C1|ATP5I|ATP1A1|NUDT5|ATP5G2|ADAL|FIGNL1|ATP6V1D|NADK|ATP6V1F|ATP6V0B|ATP6V0E1|GCH1|ATP8B1|ATP2B4|ATP11C|NME4|ATP11A|ATP1B1|NME1|NUDT9|RP2|IMPDH2|ATP6V1B2|ADSSL1|NDUFS1|ADA
6350	transcription	0.01826	CREBZF|DIDO1|CALCOCO1|THRA|ARID4A|ASH2L|ARRB1|ARRB2|TTF1|AFF4|SNAPC3|ZNF768|PARP1|ARNT|MED4|GTF2F1|KAT2A|RRAGC|THRAP3|DDIT3|IRF1|MED20|POLR1E|TBPL1|ANG|GTF3C4|PRIM1|CREBL2|MLLT1|RTF1|TAF5L|GTF2E2|MED30|POLR2A|HLTF|DVL2|POLR2E|TCEB2|POLR2I|TCFL5|POLR2J3|TRAPPC2|APOBEC3F|APOBEC3G|TAF12|NFATC3|RPA1|RPA2|SUPT5H|GTF2H3|USF2|PSMC5|PPP5C|CDK7|ERCC3|FUBP3|POLR3D|ERCC2|POLR3E|ZNF217|TAF5|CKLF
10558	negative regulation of macromolecule biosynthetic process	0.018627	NDUFA13|ZNF174|KDM1A|FMR1|EHMT1|ARID4A|TTF1|YY1|RPS14|PAIP2B|TRIM28|KAT8|CIR1|KMT5A|PRKACA|MAF1|TSPYL2|SMARCC2|USP2|TINF2|RFX3|TSC1|DKK3|EID1|ILF3|THAP7|KAT6A|RFX5|TIMELESS|KHDRBS1|DNMT1|TSG101|CTBP1|TWIST2|BAZ2A|ZNF24|DMAP1|SUDS3|WDTC1|HEXIM1|EGR1|CDT1|EIF2B3|CBX4|ZBTB14|ATP8B1|EIF2AK1|EIF2AK4|SUPT5H|SMARCA2|SMARCA4|DRAP1|MDM4|TCF3|NF2|CREBZF|RARG|LDB1|THRA|CBY1|PIGX|HHEX|VPS72|MLX|DNMT3B|LMCD1|…
50789	regulation of biological process	0.019569	EHMT1|PSMD8|PREX1|PSMD4|AKT2|ALKBH1|AKT1|PRKACA|WLS|ZNF287|GABARAPL2|PRKAB2|CXADR|ZNF284|ZNF283|CSNK2A2|RFX3|ISL1|ZNF14|SND1|EID1|MYL5|DDIT3|RUFY3|RFX5|RABL3|TBPL1|ATF3|OPTN|NGEF|ATF4|ZNF277|ZNF28|ZBTB8A|NPRL2|SHOX2|CDCA7|BAZ2A|ZNF24|ZNF25|RHOT1|PRKAR2A|MYO6|PIP5K1A|ZNF266|HEXIM1|ABCA1|CREBBP|JUN|ABCA5|EIF2AK1|PBX2|MRPL28|EIF2AK4|ZNF492|ATF7IP2|PRKAG1|MED19|ZNF43|ECSIT|MED18|PIGX|PQBP1|MED11|EDRF…
9150	purine ribonucleotide metabolic process	0.020024	ATP8A1|ATP5A1|AK1|ATP5C1|ATP5I|ATP1A1|ATP5G2|ADAL|FIGNL1|ATP6V1D|NADK|ATP6V1F|ATP6V0B|ATP6V0E1|GCH1|ATP8B1|ATP2B4|ATP11C|NME4|ATP11A|ATP1B1|NME1|NUDT9|RP2|IMPDH2|ATP6V1B2|ADSSL1|NDUFS1|ADA
9141	nucleoside triphosphate metabolic process	0.020048	ATP8A1|ATP5A1|AK1|ATP5C1|ATP5I|ATP1A1|ATP5G2|FIGNL1|ATP6V1D|NADK|ATP6V1F|ATP6V0B|ATP6V0E1|GCH1|ATP8B1|ATP2B4|ATP11C|NME4|ATP11A|ATP1B1|NME1|RRM2B|RP2|ATP6V1B2|TBPL1|NDUFS1|DCTPP1|ADA
44283	small molecule biosynthetic process	0.020497	PECR|ATP8A1|PRKAG1|ATP5C1|MTR|ATP5G2|ENO2|ADAL|NANP|SPTLC2|RFK|RNPEP|ME1|PHGDH|FADS1|PRKAB2|ATP6V0B|TPI1|ATP6V0E1|ELOVL4|AKR1A1|SORD|ATP11C|NME4|ATP11A|MIF|PGD|ATP1B1|NME1|RRM2B|RP2|ATP6V1B2|ADSSL1|TBPL1|HAGH|ATF3|ATF4|PRPS2|TSTA3|ISYNA1|PDXK|CNP|SHMT1|ATP5A1|HTT|MGST2|ATP5I|ADCY1|ATP1A1|LIAS|AGPAT2|OAZ1|PAPSS1|PRPSAP1|HMGCL|SRR|GMDS|CBS|LTA4H|ATP6V1D|CBR4|ATP6V1F|PMM1|GCH1|TPK1|ATP8B1|ATP2B4|ASN…
9109	coenzyme catabolic process	0.020574	FH|IDH1|IDH2|DLST|SUCLG2|PDHB|SDHA|ALDH1L2|SDHB|CBR3
6308	DNA catabolic process	0.021991	DFFA|XPA|RPA1|RPA2|XPC|GTF2H3|DDB1|SMUG1|CDK7|SLX4|ERCC3|ERCC2|PPT1|BAX|ERCC5|DNASE2
6793	phosphorus metabolic process	0.021991	CD81|NDUFA10|ATP5C1|CDC14B|RPS6KA6|TRIM28|RPS6KA1|PIM1|AKT1|PLCE1|NEK3|PRKACA|PDK2|PRKCI|MAP2K2|ATP6V0E1|PRKCD|CSNK2A2|CSNK1D|OCRL|CSNK1E|ACYP1|CDC25C|MAPK8IP3|CDC25B|UQCRC1|ULK1|PRKD1|RAF1|CSNK1G2|CDKL1|MTMR3|COX15|CTBP1|PRKDC|ATP5I|STK4|PRKCZ|UQCRH|NUAK2|INPP5F|PTPMT1|GRK6|PIP5K1A|ABL2|KIAA1804|NDUFV1|ATP6V1D|NADK|MAP2K5|IP6K2|ATP6V1F|NEK9|NEK4|EIF2AK1|PLK2|EIF2AK4|COQ7|CLK2|PPP5C|CDK7|CDK5|STK…
6796	phosphate metabolic process	0.021991	CD81|NDUFA10|ATP5C1|CDC14B|RPS6KA6|TRIM28|RPS6KA1|PIM1|AKT1|PLCE1|NEK3|PRKACA|PDK2|PRKCI|MAP2K2|ATP6V0E1|PRKCD|CSNK2A2|CSNK1D|OCRL|CSNK1E|ACYP1|CDC25C|MAPK8IP3|CDC25B|UQCRC1|ULK1|PRKD1|RAF1|CSNK1G2|CDKL1|MTMR3|COX15|CTBP1|PRKDC|ATP5I|STK4|PRKCZ|UQCRH|NUAK2|INPP5F|PTPMT1|GRK6|PIP5K1A|ABL2|KIAA1804|NDUFV1|ATP6V1D|NADK|MAP2K5|IP6K2|ATP6V1F|NEK9|NEK4|EIF2AK1|PLK2|EIF2AK4|COQ7|CLK2|PPP5C|CDK7|CDK5|STK…
22613	ribonucleoprotein complex biogenesis	0.022144	LRP1|RPLP0|RPL11|EXOSC7|RPS14|RPL7A|FBL|EXOSC5|SNRPD2|RPS19|TGS1|DROSHA|SNRPD3|TXNL4A|EXOSC2|EXOSC1|PRMT5|SF3A2|DIMT1|NCBP2|PIH1D1|DDX56|CIRBP|RPL35A|IMP4|TSC1|SIRT1|SNUPN|WDR55|FTSJ3|PRPF6|DDX39B|TSR2|CD2BP2|RPL24|SNRPC|SNRNP200|RSL24D1|SNRPB
10608	posttranscriptional regulation of gene expression	0.022749	EIF4A2|PPP1R15B|NDUFA13|RBM8A|PRKDC|FMR1|IREB2|MTIF2|ELAVL1|RBM3|RPS4X|PAIP2B|EIF4H|AKT1|MAPK1|FLNA|SNIP1|VHL|PRKACA|PAIP2|EIF4B|GCN1|MYLIP|EIF2B3|USP4|NCBP2|EIF2AK1|USP3|RPS5|PRKCD|USP2|CIRBP|TSC1|EIF2AK4|APTX|MIF4GD|MTOR|SND1|IMPACT|EIF3K|EIF3H|EIF3E|MDM4|ANG|PABPC1|DSC2
34621	cellular macromolecular complex subunit organization	0.022994	GFM2|TTF1|TOMM22|RPS14|PREX1|TUBB6|CHAF1A|SNRPD2|H2AFJ|SNRPD3|TXNL4A|TSPYL2|HELLS|PRMT5|H2AFY|NCBP2|COG4|PIH1D1|CIRBP|H2AFV|TUBG2|TUBG1|OXA1L|TUBB2B|PRPF6|NDUFS8|DDX39B|NDUFS7|KAT6A|NDUFS4|CD2BP2|RPL24|KIF2C|ANG|SNRPC|SNRNP200|ASF1A|SNRPB|MCM2|COX15|COX18|MIS12|C12ORF65|ICT1|TGS1|FLNA|H1FX|HIST1H3I|HIST1H3D|CENPV|SURF1|SF3A2|TUBE1|PEX13|SNUPN|NAP1L4|H1F0|H2AFY2|ABI2|CDK5|UBE2S|HIST1H4I|HIST1H4C
45934	negative regulation of nucleobase, nucleoside, nucleotide and nucleic acid metabolic process	0.024343	CREBZF|RARG|NDUFA13|ZNF174|LDB1|KDM1A|THRA|CBY1|EHMT1|ARID4A|TTF1|PIGX|YY1|RPS14|HHEX|TRIM28|VPS72|AKT2|PALM|MLX|DNMT3B|KAT8|CIR1|KMT5A|MAF1|LMCD1|TSPYL2|HELLS|SMARCC2|USP2|TINF2|RFX3|SMC1A|SENP2|TERF2|SIRT1|SIRT2|DKK3|EID1|ILF3|THAP7|KAT6A|RFX5|IRF2|TIMELESS|TERF2IP|JDP2|PPARD|KHDRBS1|DNMT1|TSG101|ZNF350|CNP|LRP1|CTBP1|HDAC1|TWIST2|BAZ2A|ZNF24|CDC45|TCEAL1|E2F1|MSX1|VHL|DMAP1|SUDS3|WDTC1|HEXIM1|…
9890	negative regulation of biosynthetic process	0.024452	NDUFA13|ZNF174|KDM1A|FMR1|EHMT1|ARID4A|TTF1|YY1|RPS14|PAIP2B|TRIM28|PALM|KAT8|CIR1|KMT5A|PRKACA|MAF1|TSPYL2|SMARCC2|USP2|TINF2|RFX3|TSC1|DKK3|EID1|ILF3|THAP7|KAT6A|RFX5|TIMELESS|KHDRBS1|DNMT1|TSG101|CTBP1|TWIST2|BAZ2A|ZNF24|DMAP1|SUDS3|WDTC1|HEXIM1|EGR1|CDT1|EIF2B3|CBX4|ZBTB14|ATP8B1|EIF2AK1|EIF2AK4|SUPT5H|SMARCA2|SMARCA4|DRAP1|MDM4|TCF3|NF2|CREBZF|RARG|ACADVL|LDB1|THRA|CBY1|PIGX|HHEX|VPS72|MLX|D…
34622	cellular macromolecular complex assembly	0.02447	TOMM22|RPS14|PREX1|TUBB6|CHAF1A|SNRPD2|H2AFJ|SNRPD3|TXNL4A|TSPYL2|HELLS|PRMT5|H2AFY|NCBP2|COG4|PIH1D1|CIRBP|H2AFV|TUBG2|TUBG1|OXA1L|TUBB2B|PRPF6|NDUFS8|DDX39B|NDUFS7|KAT6A|NDUFS4|CD2BP2|RPL24|ANG|SNRPC|SNRNP200|ASF1A|SNRPB|MCM2|COX15|COX18|MIS12|TGS1|FLNA|H1FX|HIST1H3I|HIST1H3D|CENPV|SURF1|SF3A2|TUBE1|PEX13|SNUPN|NAP1L4|H1F0|H2AFY2|CDK5|UBE2S|HIST1H4I|HIST1H4C
7549	dosage compensation	0.024968	H2AFY|H2AFY2|H2AFJ|RLIM
7010	cytoskeleton organization	0.026257	SYNM|MAFIP|ARRB1|TNFAIP1|KIF11|FMN2|HK1|PREX1|OPHN1|PALM|NUSAP1|PLCE1|SUN1|PRKCI|DYNLT1|LIMCH1|HAUS4|ACTN4|MIF|SMC1A|TUBG1|CKAP5|ERBB2IP|NISCH|PSRC1|MRAS|DAAM1|KCTD13|KIF2C|ANG|ARHGEF2|MAPT|EZR|DBN1|LLGL1|PFN2|ROCK1|CNP|ARHGAP17|PRKCZ|FGD1|PLD2|ADD2|CNN2|CNN1|CYTH2|LIMA1|PAK1|NUAK2|HAUS7|EPB41L2|FLNA|INPP5K|FLNB|BBS2|DYNC1H1|SPAG5|GADD45A|NDE1|MYO9B|TUBE1|CDC42BPB|FHDC1|ZWINT|TPPP3|ABI2|CDK5|PRC1…
6520	cellular amino acid metabolic process	0.026587	HIBADH|FRRS1|SHMT2|SHMT1|HTT|MTR|EPRS|GHR|SRR|ORC1|CBS|AFMID|PHGDH|HARS|AASS|YARS|MCCC2|ARG2|WARS|GSS|GFPT2|GFPT1|BCKDHB|SARS|ASNS|PGD|GSTZ1|QDPR|SLC7A5|ALDH6A1|DALRD3|QARS|POLG2|KARS|DDAH1|CPS1|PSAT1|DDAH2|IVD|MARS|TARS2|IARS|ATF4|AARS
30163	protein catabolic process	0.028756	RNF11|UBXN1|USP32|FBXO27|USP33|ARRB1|TNFAIP1|ARRB2|FBXO21|PSMD8|NUB1|CDC23|PSMD4|PIM1|AKT1|ARIH1|FBXO8|MYLIP|USP7|USP4|USP3|USP2|USP45|UBE4B|RAD23A|CLPX|RBX1|PJA1|DDB1|KCTD13|YME1L1|ANAPC5|USP41|CUL7|TSG101|USP10|USP11|UBR3|SPG7|HDAC6|PCNP|PSMB6|ERLEC1|PSMB5|VHL|UBE2H|MAP3K1|MTOR|PSMB8|PSMB9|PSMC5|NPLOC4|UBE2S|TTC3|PPT1|RLIM|CDK1|ERCC8|BAX|MAD2L1
44275	cellular carbohydrate catabolic process	0.028756	PYGB|PDHA1|TPI1|H6PD|HIBADH|BAD|MGA|SORD|PDHB|NUDT5|PGD|ENO2|HK1|DHTKD1|PFKL|GNPDA1|CPS1|ALDOC|PFKP|GLYR1
9267	cellular response to starvation	0.028838	SREBF1|JUN|ATG9A|ASNS|EIF2AK4|CTSV|SIRT1|HDAC6|DAP|NUAK2|NBR1|ATG4C|FADS1
6120	mitochondrial electron transport, NADH to ubiquinone	0.028838	NDUFA8|NDUFA7|NDUFB5|NDUFA10|NDUFA2|NDUFB1|NDUFS8|NDUFS7|NDUFS4|NDUFS2|NDUFS1|NDUFAF1|NDUFV1
51172	negative regulation of nitrogen compound metabolic process	0.032193	CREBZF|RARG|NDUFA13|ZNF174|LDB1|KDM1A|THRA|CBY1|EHMT1|ARID4A|TTF1|PIGX|YY1|RPS14|HHEX|TRIM28|VPS72|AKT2|PALM|MLX|DNMT3B|KAT8|CIR1|KMT5A|MAF1|LMCD1|TSPYL2|HELLS|SMARCC2|USP2|TINF2|RFX3|SMC1A|SENP2|TERF2|SIRT1|SIRT2|DKK3|EID1|ILF3|THAP7|KAT6A|RFX5|IRF2|TIMELESS|TERF2IP|JDP2|PPARD|KHDRBS1|DNMT1|TSG101|ZNF350|CNP|LRP1|CTBP1|HDAC1|TWIST2|BAZ2A|ZNF24|CDC45|TCEAL1|E2F1|MSX1|VHL|DMAP1|SUDS3|WDTC1|HEXIM1|…
9108	coenzyme biosynthetic process	0.032637	PANK2|PDXK|GCH1|TPK1|DCAKD|MGST2|LIAS|COQ7|COQ5|MTHFSD|COQ3|MTHFD2|FPGS|DBT|ME1|HAGH|MOCS1
42542	response to hydrogen peroxide	0.032637	PPP1R15B|JUN|GPX1|GPX4|PARK7|GLRX2|APTX|HDAC6|PLD2|PRDX3|DDIT3|ADRBK1|PXDN|CAT|CDK1|OLR1|ADA
18105	peptidyl-serine phosphorylation	0.034113	MAP3K1|CDK5|PRKDC|ADRBK1|AKT1|PRKACA|STK4|PRKCZ|MTOR|MAP3K12
51289	protein homotetramerization	0.034113	SRR|SHMT1|DHPS|ACOT13|ALDOC|PCBD2|DCTPP1|HSD17B10|CBR4|PFKP
43038	amino acid activation	0.034718	YARS|WARS|SARS|EPRS|DALRD3|QARS|POLG2|KARS|MARS|TARS2|HARS|IARS|AARS
43039	tRNA aminoacylation	0.034718	YARS|WARS|SARS|EPRS|DALRD3|QARS|POLG2|KARS|MARS|TARS2|HARS|IARS|AARS
6418	tRNA aminoacylation for protein translation	0.034718	YARS|WARS|SARS|EPRS|DALRD3|QARS|POLG2|KARS|MARS|TARS2|HARS|IARS|AARS
9070	serine family amino acid biosynthetic process	0.034718	SRR|CBS|PSAT1|SHMT1|PHGDH|PGD
18209	peptidyl-serine modification	0.035268	MAP3K1|GALNT3|CDK5|PRKDC|GALNT2|ADRBK1|AKT1|PRKACA|STK4|PRKCZ|MTOR|MAP3K12
6760	folic acid and derivative metabolic process	0.03599	MTHFSD|GCH1|MTHFD2|SHMT1|FPGS|MTR|ALDH1L2
6417	regulation of translation	0.036495	EIF4A2|PPP1R15B|NDUFA13|RBM8A|FMR1|IREB2|MTIF2|RBM3|RPS4X|PAIP2B|EIF4H|AKT1|MAPK1|PRKACA|PAIP2|EIF4B|GCN1|EIF2B3|NCBP2|EIF2AK1|RPS5|CIRBP|TSC1|EIF2AK4|MIF4GD|MTOR|IMPACT|EIF3K|EIF3H|EIF3E|ANG
10629	negative regulation of gene expression	0.038375	CREBZF|RARG|NDUFA13|ZNF174|LDB1|KDM1A|THRA|CBY1|EHMT1|ARID4A|ADAR|TTF1|PIGX|RBM3|YY1|RPS14|HHEX|TRIM28|VPS72|MLX|DNMT3B|KAT8|SNIP1|CIR1|KMT5A|MAF1|LMCD1|HELLS|SMARCC2|NCBP2|USP2|RFX3|MIF|SENP2|SIRT1|SND1|SIRT2|DKK3|EID1|ILF3|THAP7|KAT6A|RFX5|IRF2|TIMELESS|JDP2|PPARD|KHDRBS1|DNMT1|TSG101|ZNF350|LRP1|CTBP1|HDAC1|TWIST2|BAZ2A|ZNF24|TCEAL1|E2F1|DROSHA|MSX1|VHL|DMAP1|SUDS3|WDTC1|HEXIM1|MBD3|SUZ12|IGBP…
71103	DNA conformation change	0.03858	CDCA5|HHEX|CHAF1A|H2AFJ|TOP1MT|NUSAP1|H1FX|HIST1H3I|HIST1H3D|TSPYL2|HELLS|CENPV|H2AFY|NCAPH2|TOP3A|H2AFV|NAP1L4|H1F0|RAD51|ERCC3|H2AFY2|KAT6A|CDK1|ACIN1|HIST1H4I|MCM6|HIST1H4C|ASF1A|MCM2
6163	purine nucleotide metabolic process	0.043618	CNP|ATP8A1|ATP5A1|AK1|ATP5C1|ATP5I|ADCY1|ATP1A1|ATP5G2|PAPSS1|ADAL|GUK1|FIGNL1|ATP6V1D|NADK|ATP6V1F|ATP6V0B|ATP6V0E1|GCH1|ATP8B1|ATP2B4|ATP11C|NME4|ATP11A|ATP1B1|NME1|NUDT9|RP2|IMPDH2|ATP6V1B2|ADSSL1|NDUFS1|PDE5A|ADA
50794	regulation of cellular process	0.045923	EHMT1|PSMD8|PREX1|PSMD4|AKT2|AKT1|PRKACA|WLS|ZNF287|GABARAPL2|PRKAB2|CXADR|ZNF284|ZNF283|CSNK2A2|RFX3|ISL1|ZNF14|SND1|EID1|DDIT3|RUFY3|RFX5|RABL3|TBPL1|ATF3|OPTN|NGEF|ATF4|ZNF277|ZNF28|ZBTB8A|NPRL2|SHOX2|CDCA7|BAZ2A|ZNF24|ZNF25|RHOT1|PRKAR2A|MYO6|PIP5K1A|ZNF266|HEXIM1|ABCA1|CREBBP|JUN|ABCA5|EIF2AK1|PBX2|MRPL28|EIF2AK4|ZNF492|ATF7IP2|PRKAG1|MED19|ZNF43|ECSIT|MED18|PIGX|PQBP1|MED11|EDRF1|CHAF1A|ZNF…
86	G2/M transition of mitotic cell cycle	0.046602	KHDRBS1|CDKN1A|GADD45A|CDK2|BIRC5|ANAPC5|PPM1D|DNM2
6098	pentose-phosphate shunt	0.047325	TPI1|H6PD|HIBADH|PGD|GLYR1

## Sheet: Modules
Module Number	Module 0	Module 1	Module 2	Module 3	Module 4	Module 5	Module 6	Module 7	Module 8	Module 9	Module 10	Module 11	Module 12	Module 13	Module 14
Category	Immune processes, angiogenesis, response to stimulus	Metabolic, biosynthetic, catabolic processes	Response to stimulus, would healing	Transcription, translation, DNA replication	Transport	Cell cycle	Transcription, translation, metabolic processes	Differentiation, vasculature development	Chromatin, histone modification	Ion homeostasis	Metabolic processes	Enzymatic activity	Energy derivation	G-protein signaling	Sensory perception
Down-regulated terms	regulation of biological process	carboxylic acid metabolic process	cellular response to stress	gene expression	protein transport	cellular component organization	regulation of gene expression		protein ubiquitination		pentose-phosphate shunt		energy derivation by oxidation of organic compounds
	regulation of cellular process	cellular nitrogen compound metabolic process	response to hydrogen peroxide	RNA metabolic process	vesicle-mediated transport	cellular membrane organization	regulation of macromolecule biosynthetic process		chromatin modification		purine nucleotide metabolic process		electron transport chain
		cellular ketone metabolic process	cellular response to stimulus	protein metabolic process	macromolecule localization	cell cycle process	negative regulation of macromolecule biosynthetic process		covalent chromatin modification		NADPH regeneration		respiratory electron transport chain
		oxoacid metabolic process	response to oxidative stress	protein catabolic process	cellular protein localization	cell cycle phase	negative regulation of macromolecule metabolic process		histone modification		nucleoside phosphate metabolic process		ATP synthesis coupled electron transport
		cellular metabolic process	cellular response to starvation	methylation	interspecies interaction between organisms	cellular component assembly	posttranscriptional regulation of gene expression		histone acetylation		nucleotide metabolic process		mitochondrial ATP synthesis coupled electron transport
		primary metabolic process	response to UV	cellular macromolecule biosynthetic process	establishment of protein localization	ribonucleoprotein complex biogenesis	negative regulation of gene expression		peptidyl-serine phosphorylation		nucleoside triphosphate metabolic process		cellular respiration
		cellular catabolic process	UV protection	RNA splicing, via transesterification reactions	intracellular transport	mitotic cell cycle	regulation of nucleobase, nucleoside, nucleotide and nucleic acid metabolic process		peptidyl-serine modification		purine ribonucleotide metabolic process		oxidation reduction
		cellular biosynthetic process		RNA splicing, via transesterification reactions with bulged adenosine as nucleophile	Golgi vesicle transport	M phase	regulation of metabolic process		protein modification by small protein conjugation		ribonucleotide metabolic process		generation of precursor metabolites and energy
		cellular nitrogen compound biosynthetic process		nuclear mRNA splicing, via spliceosome	cellular localization	nuclear division	regulation of cellular metabolic process		protein amino acid acylation				oxidative phosphorylation
		cellular carbohydrate catabolic process		amino acid activation	establishment of localization in cell	cellular macromolecular complex subunit organization	negative regulation of cellular metabolic process		post-translational protein modification				mitochondrial electron transport, NADH to ubiquinone
		small molecule metabolic process		tRNA aminoacylation	intracellular protein transport	cellular macromolecular complex assembly	regulation of cellular biosynthetic process		chromosome organization				phosphorus metabolic process
		small molecule biosynthetic process		macromolecule metabolic process	receptor-mediated endocytosis	macromolecular complex subunit organization	negative regulation of cellular biosynthetic process		chromatin organization				phosphate metabolic process
		heterocycle metabolic process		macromolecule modification	cellular macromolecule localization	cellular component biogenesis	regulation of transcription		chromatin assembly or disassembly				aerobic respiration
		cofactor metabolic process		macromolecule methylation	protein localization	organelle fission	negative regulation of nucleobase, nucleoside, nucleotide and nucleic acid metabolic process		protein modification process
		cofactor catabolic process		cellular macromolecule metabolic process		protein homotetramerization	regulation of nitrogen compound metabolic process		protein amino acid acetylation
		cofactor biosynthetic process		cellular macromolecule catabolic process		cell division	negative regulation of nitrogen compound metabolic process		protein modification by small protein conjugation or removal
		nucleobase, nucleoside and nucleotide metabolic process		cellular protein metabolic process		membrane organization	regulation of macromolecule metabolic process
		organic acid metabolic process		DNA metabolic process		protein complex assembly	regulation of translation
		nucleobase, nucleoside, nucleotide and nucleic acid metabolic process		DNA replication		macromolecular complex assembly	regulation of translational initiation
		cellular amino acid metabolic process		DNA-dependent DNA replication		organelle organization	dosage compensation
		L-serine metabolic process		DNA repair		mitochondrion organization	regulation of primary metabolic process
		one-carbon metabolic process		nucleotide-excision repair		cytoskeleton organization	regulation of biosynthetic process
		coenzyme metabolic process		DNA catabolic process		microtubule-based process	negative regulation of biosynthetic process
		folic acid and derivative metabolic process		transcription		protein complex biogenesis	negative regulation of metabolic process
		nitrogen compound metabolic process		RNA processing		cell cycle
		metabolic process		translation		mitosis
		catabolic process		translational elongation		DNA conformation change
		biosynthetic process		tRNA aminoacylation for protein translation		G2/M transition of mitotic cell cycle
		serine family amino acid biosynthetic process		response to DNA damage stimulus		M phase of mitotic cell cycle
		coenzyme biosynthetic process		nucleotide-excision repair, DNA damage removal		cellular process
		coenzyme catabolic process		RNA splicing
				nucleic acid metabolic process
				macromolecule catabolic process
				macromolecule biosynthetic process
Up-regulated terms	regulation of vascular endothelial growth factor production		cell migration		biological adhesion	cellular component movement	regulation of cyclic nucleotide metabolic process	vasculature development		cellular homeostasis		regulation of phospholipase activity		second-messenger-mediated signaling	cognition
	positive regulation vascular endothelial growth factor production		response to molecule of bacterial origin		signaling	cell communication	regulation of cyclic nucleotide biosynthetic process	keratinocyte differentiation		cellular cation homeostasis		positive regulation of phospholipase activity		cyclic-nucleotide-mediated signaling	sensory perception
	regulation of acute inflammatory response		immune system process		metal ion transport	cell adhesion	regulation of nucleotide biosynthetic process	epithelial cell differentiation		cellular di-, tri-valent inorganic cation homeostasis		positive regulation of phospholipase C activity		cell surface receptor linked signaling pathway	sensory perception of chemical stimulus
	positive regulation of acute inflammatory response		leukocyte chemotaxis		system process		regulation of cAMP metabolic process	keratinization		chemical homeostasis		regulation of lipase activity		G-protein coupled receptor protein signaling pathway	sensory perception of smell
	regulation of immune system process		response to lipopolysaccharide		multicellular organismal process		regulation of cAMP biosynthetic process	skin morphogenesis		ion homeostasis		positive regulation of lipase activity		G-protein signaling, coupled to cyclic nucleotide second messenger
	positive regulation of immune system process		wound healing		locomotion			epithelium development		cytosolic calcium ion homeostasis		activation of phospholipase C activity		G-protein signaling, coupled to cAMP nucleotide second messenger
	regulation of leukocyte migration		response to chemical stimulus		cell motility			epidermis development		metal ion homeostasis
	positive regulation of leukocyte migration		taxis		neurological system process			tissue development		di-, tri-valent inorganic cation homeostasis
	regulation of leukocyte chemotaxis		defense response to bacterium		localization of cell			epidermal cell differentiation		calcium ion homeostasis
	positive regulation of leukocyte chemotaxis		response to stimulus		multi-organism process					cation homeostasis
	regulation of cell migration		leukocyte migration		cell-cell signaling					cellular chemical homeostasis
	regulation of defense response		response to other organism		female pregnancy					cellular ion homeostasis
	positive regulation of defense response		cell chemotaxis		digestion					cellular calcium ion homeostasis
	regulation of fever		chemotaxis							cellular metal ion homeostasis
	positive regulation of fever		response to stress							elevation of cytosolic calcium ion concentration
	regulation of response to external stimulus		defense response
	negative regulation of response to external stimulus		inflammatory response
	positive regulation of response to external stimulus		immune response
	regulation of homeostatic process		cellular defense response
	regulation of locomotion		behavior
	positive regulation of locomotion		locomotory behavior
	regulation of cell proliferation		response to external stimulus
	positive regulation of angiogenesis		response to biotic stimulus
	positive regulation of behavior		response to wounding
	regulation of response to stimulus		response to bacterium
	positive regulation of response to stimulus
	negative regulation of response to stimulus
	regulation of inflammatory response
	positive regulation of inflammatory response
	regulation of behavior
	regulation of chemotaxis
	positive regulation of chemotaxis
	regulation of cellular component movement
	regulation of response to stress

## Sheet: Summary
Category	Module Number
Cell cycle	5
Chromatin, histone modification	8
Energy derivation	12
Metabolic processes	10
Metabolic, biosynthetic, catabolic processes	1
Transcription, translation, DNA replication	3
Transcription, translation, metabolic processes	6
Transport	4
Differentiation, vasculature development	7
Enzymatic activity	11
Immune processes, angiogenesis, response to stimulus	0
Ion homeostasis	9
Response to stimulus, would healing	2
Sensory perception	14
G-protein signaling	13
Legend:
UP regulated
DOWN regulated
Regulated in both directions

## Sheet: Manuscript and Author Info
Transcriptomic and functional analyses of 3D placental extravillous trophoblast spheroids
Supplementary Table S9
Michael K. Wong1, Mishquatul Wahed2, Sarah A. Shawky2, Anna Dvorkin-Gheva3, Sandeep Raha1,2*
1Graduate Program in Medical Sciences, McMaster University, Hamilton, Ontario, Canada, L8N 3Z5.
2Department of Pediatrics, McMaster University, Hamilton, Ontario, Canada, L8N 3Z5.
3McMaster Immunology Research Centre, McMaster University, Hamilton, ON, Canada, L8N 3Z5.
* Corresponding author email: rahas@mcmaster.ca
